# Supplementary material for: The circular economy can have oligarchic tendencies in socially-unequal countries: evidence from Chile.
Source: Research Square preprint supplement (doi:10.21203/rs.3.rs-1208887/v1), 2022-01-05
Supplement: Supplementary file 1 [file 941ac4449c18ea95f553e57e.xlsx]

## Sheet: DataforConcentration
Company type	Company name	Year	Waste Management	Tons	Related to Politics
Generation company	. J V DIEGO PORTALES	2016	Elimination	10.42	No
Generation company	2D ELECTONICA SA	2019	Valorization	5.38	No
Generation company	2D ELECTONICA SA	2018	Valorization	9	No
Generation company	2D ELECTONICA SA	2016	Valorization	9.2	No
Generation company	2D ELECTONICA SA	2015	Valorization	12	No
Generation company	2D ELECTONICA SA	2015	Valorization	12	No
Generation company	2D ELECTONICA SA	2018	Valorization	22	No
Generation company	2D ELECTONICA SA	2016	Valorization	37.98	No
Generation company	2D ELECTONICA SA	2017	Valorization	48	No
Generation company	2D ELECTONICA SA	2017	Valorization	57	No
Generation company	2D ELECTONICA SA	2018	Valorization	85	No
Generation company	2D ELECTONICA SA	2019	Valorization	113.61	No
Generation company	3M CHILE S A	2017	Elimination	0.04	No
Generation company	3M CHILE S A	2017	Elimination	0.11	No
Generation company	3M CHILE S A	2014	Elimination	0.15	No
Generation company	3M CHILE S A	2015	Elimination	0.35	No
Generation company	3M CHILE S A	2014	Elimination	1.45	No
Generation company	3M CHILE S A	2014	Elimination	3.04	No
Generation company	3M CHILE S A	2016	Elimination	29	No
Generation company	3M CHILE S A	2015	Elimination	56.39	No
Generation company	3M CHILE S A	2019	Elimination	61.21	No
Generation company	3M CHILE S A	2018	Elimination	82.29	No
Generation company	3M CHILE S A	2017	Elimination	119.14	No
Generation company	3M CHILE S A	2014	Valorization	0.01	No
Generation company	3M CHILE S A	2016	Valorization	0.02	No
Generation company	3M CHILE S A	2019	Valorization	0.02	No
Generation company	3M CHILE S A	2014	Valorization	0.02	No
Generation company	3M CHILE S A	2014	Valorization	0.03	No
Generation company	3M CHILE S A	2016	Valorization	0.08	No
Generation company	3M CHILE S A	2014	Valorization	0.24	No
Generation company	3M CHILE S A	2014	Valorization	0.24	No
Generation company	3M CHILE S A	2019	Valorization	0.42	No
Generation company	3M CHILE S A	2019	Valorization	0.7	No
Generation company	3M CHILE S A	2014	Valorization	0.89	No
Generation company	3M CHILE S A	2018	Valorization	4.82	No
Generation company	A B ARRIENDOS S A	2019	Elimination	0.2	No
Generation company	A B ARRIENDOS S A	2018	Valorization	1.45	No
Generation company	A B ARRIENDOS S A	2017	Valorization	4	No
Generation company	A G SERVICIOS Y COMPANIA LIMITADA	2016	Elimination	8.3	No
Generation company	A G SERVICIOS Y COMPANIA LIMITADA	2015	Elimination	47.9	No
Generation company	A G SERVICIOS Y COMPANIA LIMITADA	2019	Valorization	1.65	No
Generation company	A G SERVICIOS Y COMPANIA LIMITADA	2019	Valorization	55.59	No
Generation company	A G SERVICIOS Y COMPANIA LIMITADA	2019	Valorization	78.77	No
Generation company	A G SERVICIOS Y COMPANIA LIMITADA	2019	Valorization	86.32	No
Generation company	A IMPRESORES SA	2016	Valorization	26	No
Generation company	A IMPRESORES SA	2016	Valorization	48.38	No
Generation company	A J Broom Y Cia Sac	2017	Elimination	29.82	No
Generation company	A J Broom Y Cia Sac	2015	Elimination	34.2	No
Generation company	A J Broom Y Cia Sac	2016	Elimination	40	No
Generation company	A J Broom Y Cia Sac	2014	Elimination	50	No
Generation company	A MAYER REFRIGERACION INDUSTRIAL SA	2018	Valorization	15	No
Generation company	A Y B SERVICIOS GASTRONOMICOS S. A.	2014	Valorization	12	No
Generation company	A Y D EMBALAJES LIMITADA	2014	Valorization	1.27	No
Generation company	A Y D EMBALAJES LIMITADA	2014	Valorization	2.15	No
Generation company	A Y D EMBALAJES LIMITADA	2015	Valorization	14.7	No
Generation company	A Y D EMBALAJES LIMITADA	2014	Valorization	14.97	No
Generation company	A Y D EMBALAJES LIMITADA	2019	Valorization	23.59	No
Generation company	A Y D EMBALAJES LIMITADA	2014	Valorization	25.58	No
Generation company	A.G. Servicos y Cia Ltda.	2019	Elimination	20.3	No
Generation company	A.G. Servicos y Cia Ltda.	2014	Elimination	24.6	No
Generation company	A.G. Servicos y Cia Ltda.	2017	Elimination	58.8	No
Generation company	A.G. Servicos y Cia Ltda.	2015	Elimination	188.9	No
Generation company	A.G. Servicos y Cia Ltda.	2016	Elimination	246.4	No
Generation company	A.G. Servicos y Cia Ltda.	2014	Valorization	15.9	No
Generation company	A.G. Servicos y Cia Ltda.	2015	Valorization	25.4	No
Generation company	A.G. Servicos y Cia Ltda.	2019	Valorization	29	No
Generation company	A.G. Servicos y Cia Ltda.	2017	Valorization	120	No
Generation company	A.G. Servicos y Cia Ltda.	2018	Valorization	200.95	No
Generation company	AA Comercial Recauchajes Limitada	2017	Valorization	4.38	No
Generation company	AA Comercial Recauchajes Limitada	2019	Valorization	11.25	No
Generation company	ABARROTES ECONOMICOS SA	2017	Elimination	0.22	No
Generation company	ABARROTES ECONOMICOS SA	2018	Elimination	0.93	No
Generation company	ABARROTES ECONOMICOS SA	2017	Elimination	1.6	No
Generation company	ABARROTES ECONOMICOS SA	2019	Elimination	1.61	No
Generation company	ABARROTES ECONOMICOS SA	2018	Elimination	1.89	No
Generation company	ABARROTES ECONOMICOS SA	2018	Elimination	1.91	No
Generation company	ABARROTES ECONOMICOS SA	2018	Elimination	1.93	No
Generation company	ABARROTES ECONOMICOS SA	2018	Elimination	1.94	No
Generation company	ABARROTES ECONOMICOS SA	2018	Elimination	2.05	No
Generation company	ABARROTES ECONOMICOS SA	2018	Elimination	2.23	No
Generation company	ABARROTES ECONOMICOS SA	2018	Elimination	2.29	No
Generation company	ABARROTES ECONOMICOS SA	2018	Elimination	2.42	No
Generation company	ABARROTES ECONOMICOS SA	2018	Elimination	2.42	No
Generation company	ABARROTES ECONOMICOS SA	2018	Elimination	2.44	No
Generation company	ABARROTES ECONOMICOS SA	2018	Elimination	2.49	No
Generation company	ABARROTES ECONOMICOS SA	2018	Elimination	2.49	No
Generation company	ABARROTES ECONOMICOS SA	2018	Elimination	2.52	No
Generation company	ABARROTES ECONOMICOS SA	2018	Elimination	2.56	No
Generation company	ABARROTES ECONOMICOS SA	2018	Elimination	2.6	No
Generation company	ABARROTES ECONOMICOS SA	2018	Elimination	2.63	No
Generation company	ABARROTES ECONOMICOS SA	2018	Elimination	2.76	No
Generation company	ABARROTES ECONOMICOS SA	2018	Elimination	2.77	No
Generation company	ABARROTES ECONOMICOS SA	2018	Elimination	2.79	No
Generation company	ABARROTES ECONOMICOS SA	2018	Elimination	2.8	No
Generation company	ABARROTES ECONOMICOS SA	2018	Elimination	2.85	No
Generation company	ABARROTES ECONOMICOS SA	2018	Elimination	2.86	No
Generation company	ABARROTES ECONOMICOS SA	2018	Elimination	2.87	No
Generation company	ABARROTES ECONOMICOS SA	2018	Elimination	2.88	No
Generation company	ABARROTES ECONOMICOS SA	2018	Elimination	2.92	No
Generation company	ABARROTES ECONOMICOS SA	2018	Elimination	2.96	No
Generation company	ABARROTES ECONOMICOS SA	2018	Elimination	2.97	No
Generation company	ABARROTES ECONOMICOS SA	2018	Elimination	2.97	No
Generation company	ABARROTES ECONOMICOS SA	2018	Elimination	2.98	No
Generation company	ABARROTES ECONOMICOS SA	2018	Elimination	3	No
Generation company	ABARROTES ECONOMICOS SA	2018	Elimination	3.04	No
Generation company	ABARROTES ECONOMICOS SA	2018	Elimination	3.04	No
Generation company	ABARROTES ECONOMICOS SA	2018	Elimination	3.05	No
Generation company	ABARROTES ECONOMICOS SA	2018	Elimination	3.07	No
Generation company	ABARROTES ECONOMICOS SA	2018	Elimination	3.1	No
Generation company	ABARROTES ECONOMICOS SA	2018	Elimination	3.13	No
Generation company	ABARROTES ECONOMICOS SA	2018	Elimination	3.15	No
Generation company	ABARROTES ECONOMICOS SA	2018	Elimination	3.17	No
Generation company	ABARROTES ECONOMICOS SA	2018	Elimination	3.19	No
Generation company	ABARROTES ECONOMICOS SA	2018	Elimination	3.22	No
Generation company	ABARROTES ECONOMICOS SA	2018	Elimination	3.24	No
Generation company	ABARROTES ECONOMICOS SA	2018	Elimination	3.27	No
Generation company	ABARROTES ECONOMICOS SA	2018	Elimination	3.3	No
Generation company	ABARROTES ECONOMICOS SA	2019	Elimination	3.3	No
Generation company	ABARROTES ECONOMICOS SA	2018	Elimination	3.32	No
Generation company	ABARROTES ECONOMICOS SA	2018	Elimination	3.32	No
Generation company	ABARROTES ECONOMICOS SA	2018	Elimination	3.32	No
Generation company	ABARROTES ECONOMICOS SA	2018	Elimination	3.33	No
Generation company	ABARROTES ECONOMICOS SA	2018	Elimination	3.35	No
Generation company	ABARROTES ECONOMICOS SA	2018	Elimination	3.35	No
Generation company	ABARROTES ECONOMICOS SA	2018	Elimination	3.36	No
Generation company	ABARROTES ECONOMICOS SA	2018	Elimination	3.38	No
Generation company	ABARROTES ECONOMICOS SA	2018	Elimination	3.39	No
Generation company	ABARROTES ECONOMICOS SA	2018	Elimination	3.5	No
Generation company	ABARROTES ECONOMICOS SA	2018	Elimination	3.52	No
Generation company	ABARROTES ECONOMICOS SA	2018	Elimination	3.53	No
Generation company	ABARROTES ECONOMICOS SA	2018	Elimination	3.58	No
Generation company	ABARROTES ECONOMICOS SA	2018	Elimination	3.59	No
Generation company	ABARROTES ECONOMICOS SA	2018	Elimination	3.61	No
Generation company	ABARROTES ECONOMICOS SA	2018	Elimination	3.61	No
Generation company	ABARROTES ECONOMICOS SA	2018	Elimination	3.62	No
Generation company	ABARROTES ECONOMICOS SA	2018	Elimination	3.63	No
Generation company	ABARROTES ECONOMICOS SA	2018	Elimination	3.68	No
Generation company	ABARROTES ECONOMICOS SA	2018	Elimination	3.74	No
Generation company	ABARROTES ECONOMICOS SA	2018	Elimination	3.75	No
Generation company	ABARROTES ECONOMICOS SA	2018	Elimination	3.76	No
Generation company	ABARROTES ECONOMICOS SA	2018	Elimination	3.78	No
Generation company	ABARROTES ECONOMICOS SA	2018	Elimination	3.79	No
Generation company	ABARROTES ECONOMICOS SA	2018	Elimination	3.94	No
Generation company	ABARROTES ECONOMICOS SA	2018	Elimination	3.95	No
Generation company	ABARROTES ECONOMICOS SA	2018	Elimination	3.98	No
Generation company	ABARROTES ECONOMICOS SA	2018	Elimination	4.02	No
Generation company	ABARROTES ECONOMICOS SA	2018	Elimination	4.05	No
Generation company	ABARROTES ECONOMICOS SA	2018	Elimination	4.07	No
Generation company	ABARROTES ECONOMICOS SA	2018	Elimination	4.14	No
Generation company	ABARROTES ECONOMICOS SA	2018	Elimination	4.17	No
Generation company	ABARROTES ECONOMICOS SA	2018	Elimination	4.22	No
Generation company	ABARROTES ECONOMICOS SA	2018	Elimination	4.26	No
Generation company	ABARROTES ECONOMICOS SA	2018	Elimination	4.27	No
Generation company	ABARROTES ECONOMICOS SA	2018	Elimination	4.27	No
Generation company	ABARROTES ECONOMICOS SA	2018	Elimination	4.28	No
Generation company	ABARROTES ECONOMICOS SA	2018	Elimination	4.29	No
Generation company	ABARROTES ECONOMICOS SA	2018	Elimination	4.36	No
Generation company	ABARROTES ECONOMICOS SA	2018	Elimination	4.44	No
Generation company	ABARROTES ECONOMICOS SA	2018	Elimination	4.47	No
Generation company	ABARROTES ECONOMICOS SA	2018	Elimination	4.53	No
Generation company	ABARROTES ECONOMICOS SA	2018	Elimination	4.53	No
Generation company	ABARROTES ECONOMICOS SA	2018	Elimination	4.64	No
Generation company	ABARROTES ECONOMICOS SA	2018	Elimination	4.68	No
Generation company	ABARROTES ECONOMICOS SA	2017	Elimination	4.75	No
Generation company	ABARROTES ECONOMICOS SA	2018	Elimination	4.8	No
Generation company	ABARROTES ECONOMICOS SA	2018	Elimination	4.86	No
Generation company	ABARROTES ECONOMICOS SA	2018	Elimination	4.88	No
Generation company	ABARROTES ECONOMICOS SA	2018	Elimination	4.91	No
Generation company	ABARROTES ECONOMICOS SA	2018	Elimination	4.92	No
Generation company	ABARROTES ECONOMICOS SA	2018	Elimination	4.94	No
Generation company	ABARROTES ECONOMICOS SA	2018	Elimination	4.95	No
Generation company	ABARROTES ECONOMICOS SA	2018	Elimination	4.97	No
Generation company	ABARROTES ECONOMICOS SA	2017	Elimination	4.97	No
Generation company	ABARROTES ECONOMICOS SA	2018	Elimination	5.05	No
Generation company	ABARROTES ECONOMICOS SA	2019	Elimination	5.12	No
Generation company	ABARROTES ECONOMICOS SA	2018	Elimination	5.17	No
Generation company	ABARROTES ECONOMICOS SA	2018	Elimination	5.17	No
Generation company	ABARROTES ECONOMICOS SA	2018	Elimination	5.23	No
Generation company	ABARROTES ECONOMICOS SA	2018	Elimination	5.24	No
Generation company	ABARROTES ECONOMICOS SA	2018	Elimination	5.24	No
Generation company	ABARROTES ECONOMICOS SA	2018	Elimination	5.27	No
Generation company	ABARROTES ECONOMICOS SA	2018	Elimination	5.28	No
Generation company	ABARROTES ECONOMICOS SA	2018	Elimination	5.31	No
Generation company	ABARROTES ECONOMICOS SA	2018	Elimination	5.35	No
Generation company	ABARROTES ECONOMICOS SA	2018	Elimination	5.37	No
Generation company	ABARROTES ECONOMICOS SA	2018	Elimination	5.45	No
Generation company	ABARROTES ECONOMICOS SA	2017	Elimination	5.45	No
Generation company	ABARROTES ECONOMICOS SA	2018	Elimination	5.53	No
Generation company	ABARROTES ECONOMICOS SA	2018	Elimination	5.53	No
Generation company	ABARROTES ECONOMICOS SA	2018	Elimination	5.57	No
Generation company	ABARROTES ECONOMICOS SA	2019	Elimination	5.59	No
Generation company	ABARROTES ECONOMICOS SA	2018	Elimination	5.61	No
Generation company	ABARROTES ECONOMICOS SA	2018	Elimination	5.67	No
Generation company	ABARROTES ECONOMICOS SA	2018	Elimination	5.69	No
Generation company	ABARROTES ECONOMICOS SA	2018	Elimination	5.7	No
Generation company	ABARROTES ECONOMICOS SA	2018	Elimination	5.73	No
Generation company	ABARROTES ECONOMICOS SA	2018	Elimination	5.8	No
Generation company	ABARROTES ECONOMICOS SA	2018	Elimination	5.9	No
Generation company	ABARROTES ECONOMICOS SA	2019	Elimination	5.9	No
Generation company	ABARROTES ECONOMICOS SA	2018	Elimination	5.91	No
Generation company	ABARROTES ECONOMICOS SA	2018	Elimination	5.95	No
Generation company	ABARROTES ECONOMICOS SA	2018	Elimination	5.96	No
Generation company	ABARROTES ECONOMICOS SA	2018	Elimination	5.98	No
Generation company	ABARROTES ECONOMICOS SA	2018	Elimination	6.03	No
Generation company	ABARROTES ECONOMICOS SA	2019	Elimination	6.18	No
Generation company	ABARROTES ECONOMICOS SA	2018	Elimination	6.34	No
Generation company	ABARROTES ECONOMICOS SA	2018	Elimination	6.38	No
Generation company	ABARROTES ECONOMICOS SA	2018	Elimination	6.49	No
Generation company	ABARROTES ECONOMICOS SA	2018	Elimination	6.57	No
Generation company	ABARROTES ECONOMICOS SA	2018	Elimination	6.65	No
Generation company	ABARROTES ECONOMICOS SA	2019	Elimination	6.73	No
Generation company	ABARROTES ECONOMICOS SA	2018	Elimination	6.76	No
Generation company	ABARROTES ECONOMICOS SA	2018	Elimination	6.78	No
Generation company	ABARROTES ECONOMICOS SA	2018	Elimination	6.79	No
Generation company	ABARROTES ECONOMICOS SA	2017	Elimination	6.84	No
Generation company	ABARROTES ECONOMICOS SA	2018	Elimination	6.96	No
Generation company	ABARROTES ECONOMICOS SA	2018	Elimination	6.98	No
Generation company	ABARROTES ECONOMICOS SA	2018	Elimination	6.99	No
Generation company	ABARROTES ECONOMICOS SA	2018	Elimination	7.11	No
Generation company	ABARROTES ECONOMICOS SA	2017	Elimination	7.12	No
Generation company	ABARROTES ECONOMICOS SA	2018	Elimination	7.16	No
Generation company	ABARROTES ECONOMICOS SA	2018	Elimination	7.22	No
Generation company	ABARROTES ECONOMICOS SA	2018	Elimination	7.28	No
Generation company	ABARROTES ECONOMICOS SA	2018	Elimination	7.28	No
Generation company	ABARROTES ECONOMICOS SA	2018	Elimination	7.51	No
Generation company	ABARROTES ECONOMICOS SA	2018	Elimination	7.52	No
Generation company	ABARROTES ECONOMICOS SA	2018	Elimination	7.58	No
Generation company	ABARROTES ECONOMICOS SA	2018	Elimination	7.6	No
Generation company	ABARROTES ECONOMICOS SA	2017	Elimination	7.6	No
Generation company	ABARROTES ECONOMICOS SA	2018	Elimination	7.92	No
Generation company	ABARROTES ECONOMICOS SA	2018	Elimination	7.95	No
Generation company	ABARROTES ECONOMICOS SA	2018	Elimination	7.97	No
Generation company	ABARROTES ECONOMICOS SA	2018	Elimination	7.98	No
Generation company	ABARROTES ECONOMICOS SA	2019	Elimination	7.99	No
Generation company	ABARROTES ECONOMICOS SA	2018	Elimination	8.15	No
Generation company	ABARROTES ECONOMICOS SA	2018	Elimination	8.63	No
Generation company	ABARROTES ECONOMICOS SA	2019	Elimination	8.72	No
Generation company	ABARROTES ECONOMICOS SA	2018	Elimination	8.94	No
Generation company	ABARROTES ECONOMICOS SA	2018	Elimination	8.98	No
Generation company	ABARROTES ECONOMICOS SA	2018	Elimination	9.07	No
Generation company	ABARROTES ECONOMICOS SA	2019	Elimination	9.26	No
Generation company	ABARROTES ECONOMICOS SA	2018	Elimination	9.55	No
Generation company	ABARROTES ECONOMICOS SA	2019	Elimination	9.94	No
Generation company	ABARROTES ECONOMICOS SA	2019	Elimination	9.98	No
Generation company	ABARROTES ECONOMICOS SA	2018	Elimination	10.53	No
Generation company	ABARROTES ECONOMICOS SA	2017	Elimination	11.15	No
Generation company	ABARROTES ECONOMICOS SA	2018	Elimination	11.22	No
Generation company	ABARROTES ECONOMICOS SA	2019	Elimination	12.11	No
Generation company	ABARROTES ECONOMICOS SA	2017	Elimination	12.74	No
Generation company	ABARROTES ECONOMICOS SA	2019	Elimination	12.82	No
Generation company	ABARROTES ECONOMICOS SA	2019	Elimination	13.31	No
Generation company	ABARROTES ECONOMICOS SA	2018	Elimination	13.49	No
Generation company	ABARROTES ECONOMICOS SA	2018	Elimination	14.08	No
Generation company	ABARROTES ECONOMICOS SA	2019	Elimination	14.17	No
Generation company	ABARROTES ECONOMICOS SA	2017	Elimination	14.44	No
Generation company	ABARROTES ECONOMICOS SA	2017	Elimination	14.45	No
Generation company	ABARROTES ECONOMICOS SA	2018	Elimination	15.07	No
Generation company	ABARROTES ECONOMICOS SA	2019	Elimination	15.38	No
Generation company	ABARROTES ECONOMICOS SA	2018	Elimination	15.58	No
Generation company	ABARROTES ECONOMICOS SA	2019	Elimination	16.67	No
Generation company	ABARROTES ECONOMICOS SA	2017	Elimination	19.17	No
Generation company	ABARROTES ECONOMICOS SA	2017	Elimination	20.85	No
Generation company	ABARROTES ECONOMICOS SA	2015	Elimination	21.79	No
Generation company	ABARROTES ECONOMICOS SA	2018	Elimination	22.44	No
Generation company	ABARROTES ECONOMICOS SA	2018	Elimination	23.34	No
Generation company	ABARROTES ECONOMICOS SA	2016	Elimination	24.71	No
Generation company	ABARROTES ECONOMICOS SA	2019	Elimination	25.55	No
Generation company	ABARROTES ECONOMICOS SA	2017	Elimination	27.29	No
Generation company	ABARROTES ECONOMICOS SA	2016	Elimination	28	No
Generation company	ABARROTES ECONOMICOS SA	2014	Elimination	28.85	No
Generation company	ABARROTES ECONOMICOS SA	2018	Elimination	30.18	No
Generation company	ABARROTES ECONOMICOS SA	2017	Elimination	30.6	No
Generation company	ABARROTES ECONOMICOS SA	2017	Elimination	31.09	No
Generation company	ABARROTES ECONOMICOS SA	2017	Elimination	32.73	No
Generation company	ABARROTES ECONOMICOS SA	2015	Elimination	34.26	No
Generation company	ABARROTES ECONOMICOS SA	2017	Elimination	43.2	No
Generation company	ABARROTES ECONOMICOS SA	2014	Elimination	43.28	No
Generation company	ABARROTES ECONOMICOS SA	2015	Elimination	46.64	No
Generation company	ABARROTES ECONOMICOS SA	2017	Elimination	50.34	No
Generation company	ABARROTES ECONOMICOS SA	2015	Elimination	50.52	No
Generation company	ABARROTES ECONOMICOS SA	2017	Elimination	53.82	No
Generation company	ABARROTES ECONOMICOS SA	2017	Elimination	54	No
Generation company	ABARROTES ECONOMICOS SA	2015	Elimination	58.2	No
Generation company	ABARROTES ECONOMICOS SA	2019	Elimination	60.14	No
Generation company	ABARROTES ECONOMICOS SA	2017	Elimination	60.37	No
Generation company	ABARROTES ECONOMICOS SA	2019	Elimination	61.68	No
Generation company	ABARROTES ECONOMICOS SA	2019	Elimination	63.6	No
Generation company	ABARROTES ECONOMICOS SA	2018	Elimination	64	No
Generation company	ABARROTES ECONOMICOS SA	2019	Elimination	64.01	No
Generation company	ABARROTES ECONOMICOS SA	2018	Elimination	68.95	No
Generation company	ABARROTES ECONOMICOS SA	2019	Elimination	70.7	No
Generation company	ABARROTES ECONOMICOS SA	2019	Elimination	70.78	No
Generation company	ABARROTES ECONOMICOS SA	2018	Elimination	74.76	No
Generation company	ABARROTES ECONOMICOS SA	2017	Elimination	75.61	No
Generation company	ABARROTES ECONOMICOS SA	2019	Elimination	75.65	No
Generation company	ABARROTES ECONOMICOS SA	2018	Elimination	77.42	No
Generation company	ABARROTES ECONOMICOS SA	2019	Elimination	77.7	No
Generation company	ABARROTES ECONOMICOS SA	2018	Elimination	80.12	No
Generation company	ABARROTES ECONOMICOS SA	2017	Elimination	81.02	No
Generation company	ABARROTES ECONOMICOS SA	2019	Elimination	83.2	No
Generation company	ABARROTES ECONOMICOS SA	2019	Elimination	83.24	No
Generation company	ABARROTES ECONOMICOS SA	2019	Elimination	83.4	No
Generation company	ABARROTES ECONOMICOS SA	2017	Elimination	84.23	No
Generation company	ABARROTES ECONOMICOS SA	2019	Elimination	84.3	No
Generation company	ABARROTES ECONOMICOS SA	2019	Elimination	88.4	No
Generation company	ABARROTES ECONOMICOS SA	2018	Elimination	97.36	No
Generation company	ABARROTES ECONOMICOS SA	2019	Elimination	104.01	No
Generation company	ABARROTES ECONOMICOS SA	2017	Elimination	107.02	No
Generation company	ABARROTES ECONOMICOS SA	2019	Elimination	108.33	No
Generation company	ABARROTES ECONOMICOS SA	2018	Elimination	108.37	No
Generation company	ABARROTES ECONOMICOS SA	2018	Elimination	129.95	No
Generation company	ABARROTES ECONOMICOS SA	2019	Elimination	146.57	No
Generation company	ABARROTES ECONOMICOS SA	2014	Elimination	149.21	No
Generation company	ABARROTES ECONOMICOS SA	2018	Elimination	159.62	No
Generation company	ABARROTES ECONOMICOS SA	2018	Elimination	258	No
Generation company	ABARROTES ECONOMICOS SA	2019	Elimination	411	No
Generation company	ABARROTES ECONOMICOS SA	2017	Valorization	0.02	No
Generation company	ABARROTES ECONOMICOS SA	2017	Valorization	0.03	No
Generation company	ABARROTES ECONOMICOS SA	2016	Valorization	0.03	No
Generation company	ABARROTES ECONOMICOS SA	2017	Valorization	0.03	No
Generation company	ABARROTES ECONOMICOS SA	2018	Valorization	0.04	No
Generation company	ABARROTES ECONOMICOS SA	2016	Valorization	0.05	No
Generation company	ABARROTES ECONOMICOS SA	2016	Valorization	0.05	No
Generation company	ABARROTES ECONOMICOS SA	2018	Valorization	0.06	No
Generation company	ABARROTES ECONOMICOS SA	2017	Valorization	0.07	No
Generation company	ABARROTES ECONOMICOS SA	2016	Valorization	0.08	No
Generation company	ABARROTES ECONOMICOS SA	2016	Valorization	0.08	No
Generation company	ABARROTES ECONOMICOS SA	2016	Valorization	0.08	No
Generation company	ABARROTES ECONOMICOS SA	2016	Valorization	0.088	No
Generation company	ABARROTES ECONOMICOS SA	2017	Valorization	0.09	No
Generation company	ABARROTES ECONOMICOS SA	2017	Valorization	0.09	No
Generation company	ABARROTES ECONOMICOS SA	2016	Valorization	0.11	No
Generation company	ABARROTES ECONOMICOS SA	2015	Valorization	0.12	No
Generation company	ABARROTES ECONOMICOS SA	2016	Valorization	0.12	No
Generation company	ABARROTES ECONOMICOS SA	2016	Valorization	0.12	No
Generation company	ABARROTES ECONOMICOS SA	2019	Valorization	0.12	No
Generation company	ABARROTES ECONOMICOS SA	2017	Valorization	0.12	No
Generation company	ABARROTES ECONOMICOS SA	2016	Valorization	0.15	No
Generation company	ABARROTES ECONOMICOS SA	2019	Valorization	0.17	No
Generation company	ABARROTES ECONOMICOS SA	2016	Valorization	0.18	No
Generation company	ABARROTES ECONOMICOS SA	2016	Valorization	0.19	No
Generation company	ABARROTES ECONOMICOS SA	2015	Valorization	0.19	No
Generation company	ABARROTES ECONOMICOS SA	2016	Valorization	0.19	No
Generation company	ABARROTES ECONOMICOS SA	2019	Valorization	0.2	No
Generation company	ABARROTES ECONOMICOS SA	2016	Valorization	0.21	No
Generation company	ABARROTES ECONOMICOS SA	2016	Valorization	0.23	No
Generation company	ABARROTES ECONOMICOS SA	2018	Valorization	0.23	No
Generation company	ABARROTES ECONOMICOS SA	2017	Valorization	0.23	No
Generation company	ABARROTES ECONOMICOS SA	2017	Valorization	0.24	No
Generation company	ABARROTES ECONOMICOS SA	2016	Valorization	0.25	No
Generation company	ABARROTES ECONOMICOS SA	2016	Valorization	0.25	No
Generation company	ABARROTES ECONOMICOS SA	2017	Valorization	0.25	No
Generation company	ABARROTES ECONOMICOS SA	2018	Valorization	0.25	No
Generation company	ABARROTES ECONOMICOS SA	2016	Valorization	0.26	No
Generation company	ABARROTES ECONOMICOS SA	2015	Valorization	0.26	No
Generation company	ABARROTES ECONOMICOS SA	2016	Valorization	0.26	No
Generation company	ABARROTES ECONOMICOS SA	2018	Valorization	0.26	No
Generation company	ABARROTES ECONOMICOS SA	2016	Valorization	0.27	No
Generation company	ABARROTES ECONOMICOS SA	2016	Valorization	0.28	No
Generation company	ABARROTES ECONOMICOS SA	2016	Valorization	0.28	No
Generation company	ABARROTES ECONOMICOS SA	2017	Valorization	0.28	No
Generation company	ABARROTES ECONOMICOS SA	2016	Valorization	0.28	No
Generation company	ABARROTES ECONOMICOS SA	2016	Valorization	0.29	No
Generation company	ABARROTES ECONOMICOS SA	2017	Valorization	0.29	No
Generation company	ABARROTES ECONOMICOS SA	2017	Valorization	0.29	No
Generation company	ABARROTES ECONOMICOS SA	2017	Valorization	0.29	No
Generation company	ABARROTES ECONOMICOS SA	2015	Valorization	0.3	No
Generation company	ABARROTES ECONOMICOS SA	2016	Valorization	0.3	No
Generation company	ABARROTES ECONOMICOS SA	2017	Valorization	0.31	No
Generation company	ABARROTES ECONOMICOS SA	2017	Valorization	0.32	No
Generation company	ABARROTES ECONOMICOS SA	2016	Valorization	0.32	No
Generation company	ABARROTES ECONOMICOS SA	2016	Valorization	0.32	No
Generation company	ABARROTES ECONOMICOS SA	2017	Valorization	0.34	No
Generation company	ABARROTES ECONOMICOS SA	2017	Valorization	0.34	No
Generation company	ABARROTES ECONOMICOS SA	2016	Valorization	0.34	No
Generation company	ABARROTES ECONOMICOS SA	2017	Valorization	0.35	No
Generation company	ABARROTES ECONOMICOS SA	2016	Valorization	0.36	No
Generation company	ABARROTES ECONOMICOS SA	2016	Valorization	0.36	No
Generation company	ABARROTES ECONOMICOS SA	2016	Valorization	0.36	No
Generation company	ABARROTES ECONOMICOS SA	2016	Valorization	0.37	No
Generation company	ABARROTES ECONOMICOS SA	2016	Valorization	0.38	No
Generation company	ABARROTES ECONOMICOS SA	2017	Valorization	0.38	No
Generation company	ABARROTES ECONOMICOS SA	2016	Valorization	0.38	No
Generation company	ABARROTES ECONOMICOS SA	2016	Valorization	0.39	No
Generation company	ABARROTES ECONOMICOS SA	2017	Valorization	0.396	No
Generation company	ABARROTES ECONOMICOS SA	2016	Valorization	0.4	No
Generation company	ABARROTES ECONOMICOS SA	2016	Valorization	0.4	No
Generation company	ABARROTES ECONOMICOS SA	2019	Valorization	0.4	No
Generation company	ABARROTES ECONOMICOS SA	2017	Valorization	0.41	No
Generation company	ABARROTES ECONOMICOS SA	2016	Valorization	0.41	No
Generation company	ABARROTES ECONOMICOS SA	2019	Valorization	0.415	No
Generation company	ABARROTES ECONOMICOS SA	2017	Valorization	0.418	No
Generation company	ABARROTES ECONOMICOS SA	2016	Valorization	0.42	No
Generation company	ABARROTES ECONOMICOS SA	2016	Valorization	0.43	No
Generation company	ABARROTES ECONOMICOS SA	2016	Valorization	0.43	No
Generation company	ABARROTES ECONOMICOS SA	2016	Valorization	0.44	No
Generation company	ABARROTES ECONOMICOS SA	2016	Valorization	0.44	No
Generation company	ABARROTES ECONOMICOS SA	2016	Valorization	0.44	No
Generation company	ABARROTES ECONOMICOS SA	2015	Valorization	0.47	No
Generation company	ABARROTES ECONOMICOS SA	2016	Valorization	0.48	No
Generation company	ABARROTES ECONOMICOS SA	2016	Valorization	0.48	No
Generation company	ABARROTES ECONOMICOS SA	2017	Valorization	0.48	No
Generation company	ABARROTES ECONOMICOS SA	2016	Valorization	0.5	No
Generation company	ABARROTES ECONOMICOS SA	2016	Valorization	0.5	No
Generation company	ABARROTES ECONOMICOS SA	2017	Valorization	0.5	No
Generation company	ABARROTES ECONOMICOS SA	2019	Valorization	0.5	No
Generation company	ABARROTES ECONOMICOS SA	2019	Valorization	0.5	No
Generation company	ABARROTES ECONOMICOS SA	2019	Valorization	0.5	No
Generation company	ABARROTES ECONOMICOS SA	2016	Valorization	0.51	No
Generation company	ABARROTES ECONOMICOS SA	2016	Valorization	0.52	No
Generation company	ABARROTES ECONOMICOS SA	2017	Valorization	0.52	No
Generation company	ABARROTES ECONOMICOS SA	2016	Valorization	0.52	No
Generation company	ABARROTES ECONOMICOS SA	2016	Valorization	0.53	No
Generation company	ABARROTES ECONOMICOS SA	2016	Valorization	0.53	No
Generation company	ABARROTES ECONOMICOS SA	2016	Valorization	0.53	No
Generation company	ABARROTES ECONOMICOS SA	2018	Valorization	0.53	No
Generation company	ABARROTES ECONOMICOS SA	2018	Valorization	0.53	No
Generation company	ABARROTES ECONOMICOS SA	2016	Valorization	0.54	No
Generation company	ABARROTES ECONOMICOS SA	2016	Valorization	0.54	No
Generation company	ABARROTES ECONOMICOS SA	2016	Valorization	0.55	No
Generation company	ABARROTES ECONOMICOS SA	2016	Valorization	0.556	No
Generation company	ABARROTES ECONOMICOS SA	2016	Valorization	0.56	No
Generation company	ABARROTES ECONOMICOS SA	2016	Valorization	0.56	No
Generation company	ABARROTES ECONOMICOS SA	2018	Valorization	0.56	No
Generation company	ABARROTES ECONOMICOS SA	2016	Valorization	0.57	No
Generation company	ABARROTES ECONOMICOS SA	2016	Valorization	0.57	No
Generation company	ABARROTES ECONOMICOS SA	2017	Valorization	0.58	No
Generation company	ABARROTES ECONOMICOS SA	2017	Valorization	0.59	No
Generation company	ABARROTES ECONOMICOS SA	2016	Valorization	0.59	No
Generation company	ABARROTES ECONOMICOS SA	2018	Valorization	0.59	No
Generation company	ABARROTES ECONOMICOS SA	2016	Valorization	0.6	No
Generation company	ABARROTES ECONOMICOS SA	2016	Valorization	0.6	No
Generation company	ABARROTES ECONOMICOS SA	2015	Valorization	0.6	No
Generation company	ABARROTES ECONOMICOS SA	2017	Valorization	0.6	No
Generation company	ABARROTES ECONOMICOS SA	2016	Valorization	0.61	No
Generation company	ABARROTES ECONOMICOS SA	2016	Valorization	0.61	No
Generation company	ABARROTES ECONOMICOS SA	2016	Valorization	0.62	No
Generation company	ABARROTES ECONOMICOS SA	2016	Valorization	0.62	No
Generation company	ABARROTES ECONOMICOS SA	2016	Valorization	0.64	No
Generation company	ABARROTES ECONOMICOS SA	2016	Valorization	0.64	No
Generation company	ABARROTES ECONOMICOS SA	2018	Valorization	0.64	No
Generation company	ABARROTES ECONOMICOS SA	2016	Valorization	0.65	No
Generation company	ABARROTES ECONOMICOS SA	2016	Valorization	0.65	No
Generation company	ABARROTES ECONOMICOS SA	2017	Valorization	0.65	No
Generation company	ABARROTES ECONOMICOS SA	2017	Valorization	0.66	No
Generation company	ABARROTES ECONOMICOS SA	2016	Valorization	0.67	No
Generation company	ABARROTES ECONOMICOS SA	2016	Valorization	0.67	No
Generation company	ABARROTES ECONOMICOS SA	2016	Valorization	0.67	No
Generation company	ABARROTES ECONOMICOS SA	2017	Valorization	0.68	No
Generation company	ABARROTES ECONOMICOS SA	2015	Valorization	0.69	No
Generation company	ABARROTES ECONOMICOS SA	2015	Valorization	0.69	No
Generation company	ABARROTES ECONOMICOS SA	2017	Valorization	0.69	No
Generation company	ABARROTES ECONOMICOS SA	2016	Valorization	0.691	No
Generation company	ABARROTES ECONOMICOS SA	2016	Valorization	0.7	No
Generation company	ABARROTES ECONOMICOS SA	2017	Valorization	0.7	No
Generation company	ABARROTES ECONOMICOS SA	2016	Valorization	0.7	No
Generation company	ABARROTES ECONOMICOS SA	2019	Valorization	0.7	No
Generation company	ABARROTES ECONOMICOS SA	2016	Valorization	0.7	No
Generation company	ABARROTES ECONOMICOS SA	2016	Valorization	0.7	No
Generation company	ABARROTES ECONOMICOS SA	2016	Valorization	0.7	No
Generation company	ABARROTES ECONOMICOS SA	2018	Valorization	0.7	No
Generation company	ABARROTES ECONOMICOS SA	2017	Valorization	0.71	No
Generation company	ABARROTES ECONOMICOS SA	2017	Valorization	0.73	No
Generation company	ABARROTES ECONOMICOS SA	2017	Valorization	0.73	No
Generation company	ABARROTES ECONOMICOS SA	2018	Valorization	0.73	No
Generation company	ABARROTES ECONOMICOS SA	2017	Valorization	0.737	No
Generation company	ABARROTES ECONOMICOS SA	2017	Valorization	0.74	No
Generation company	ABARROTES ECONOMICOS SA	2016	Valorization	0.74	No
Generation company	ABARROTES ECONOMICOS SA	2017	Valorization	0.74	No
Generation company	ABARROTES ECONOMICOS SA	2016	Valorization	0.74	No
Generation company	ABARROTES ECONOMICOS SA	2017	Valorization	0.74	No
Generation company	ABARROTES ECONOMICOS SA	2016	Valorization	0.76	No
Generation company	ABARROTES ECONOMICOS SA	2016	Valorization	0.76	No
Generation company	ABARROTES ECONOMICOS SA	2017	Valorization	0.76	No
Generation company	ABARROTES ECONOMICOS SA	2017	Valorization	0.76	No
Generation company	ABARROTES ECONOMICOS SA	2017	Valorization	0.76	No
Generation company	ABARROTES ECONOMICOS SA	2018	Valorization	0.77	No
Generation company	ABARROTES ECONOMICOS SA	2018	Valorization	0.77	No
Generation company	ABARROTES ECONOMICOS SA	2019	Valorization	0.771	No
Generation company	ABARROTES ECONOMICOS SA	2018	Valorization	0.78	No
Generation company	ABARROTES ECONOMICOS SA	2016	Valorization	0.79	No
Generation company	ABARROTES ECONOMICOS SA	2016	Valorization	0.79	No
Generation company	ABARROTES ECONOMICOS SA	2015	Valorization	0.79	No
Generation company	ABARROTES ECONOMICOS SA	2016	Valorization	0.79	No
Generation company	ABARROTES ECONOMICOS SA	2017	Valorization	0.79	No
Generation company	ABARROTES ECONOMICOS SA	2018	Valorization	0.8	No
Generation company	ABARROTES ECONOMICOS SA	2018	Valorization	0.8	No
Generation company	ABARROTES ECONOMICOS SA	2016	Valorization	0.81	No
Generation company	ABARROTES ECONOMICOS SA	2017	Valorization	0.81	No
Generation company	ABARROTES ECONOMICOS SA	2018	Valorization	0.81	No
Generation company	ABARROTES ECONOMICOS SA	2017	Valorization	0.824	No
Generation company	ABARROTES ECONOMICOS SA	2016	Valorization	0.85	No
Generation company	ABARROTES ECONOMICOS SA	2017	Valorization	0.85	No
Generation company	ABARROTES ECONOMICOS SA	2018	Valorization	0.86	No
Generation company	ABARROTES ECONOMICOS SA	2017	Valorization	0.86	No
Generation company	ABARROTES ECONOMICOS SA	2016	Valorization	0.87	No
Generation company	ABARROTES ECONOMICOS SA	2018	Valorization	0.87	No
Generation company	ABARROTES ECONOMICOS SA	2018	Valorization	0.89	No
Generation company	ABARROTES ECONOMICOS SA	2016	Valorization	0.9	No
Generation company	ABARROTES ECONOMICOS SA	2016	Valorization	0.9	No
Generation company	ABARROTES ECONOMICOS SA	2016	Valorization	0.92	No
Generation company	ABARROTES ECONOMICOS SA	2018	Valorization	0.92	No
Generation company	ABARROTES ECONOMICOS SA	2017	Valorization	0.93	No
Generation company	ABARROTES ECONOMICOS SA	2016	Valorization	0.94	No
Generation company	ABARROTES ECONOMICOS SA	2018	Valorization	0.94	No
Generation company	ABARROTES ECONOMICOS SA	2018	Valorization	0.94	No
Generation company	ABARROTES ECONOMICOS SA	2017	Valorization	0.95	No
Generation company	ABARROTES ECONOMICOS SA	2016	Valorization	0.95	No
Generation company	ABARROTES ECONOMICOS SA	2017	Valorization	0.95	No
Generation company	ABARROTES ECONOMICOS SA	2018	Valorization	0.95	No
Generation company	ABARROTES ECONOMICOS SA	2015	Valorization	0.96	No
Generation company	ABARROTES ECONOMICOS SA	2017	Valorization	0.96	No
Generation company	ABARROTES ECONOMICOS SA	2016	Valorization	0.96	No
Generation company	ABARROTES ECONOMICOS SA	2018	Valorization	0.96	No
Generation company	ABARROTES ECONOMICOS SA	2018	Valorization	0.96	No
Generation company	ABARROTES ECONOMICOS SA	2018	Valorization	0.96	No
Generation company	ABARROTES ECONOMICOS SA	2015	Valorization	0.97	No
Generation company	ABARROTES ECONOMICOS SA	2018	Valorization	0.97	No
Generation company	ABARROTES ECONOMICOS SA	2017	Valorization	0.97	No
Generation company	ABARROTES ECONOMICOS SA	2017	Valorization	0.98	No
Generation company	ABARROTES ECONOMICOS SA	2015	Valorization	0.98	No
Generation company	ABARROTES ECONOMICOS SA	2017	Valorization	0.99	No
Generation company	ABARROTES ECONOMICOS SA	2016	Valorization	1	No
Generation company	ABARROTES ECONOMICOS SA	2016	Valorization	1	No
Generation company	ABARROTES ECONOMICOS SA	2016	Valorization	1	No
Generation company	ABARROTES ECONOMICOS SA	2019	Valorization	1	No
Generation company	ABARROTES ECONOMICOS SA	2018	Valorization	1.02	No
Generation company	ABARROTES ECONOMICOS SA	2017	Valorization	1.04	No
Generation company	ABARROTES ECONOMICOS SA	2017	Valorization	1.04	No
Generation company	ABARROTES ECONOMICOS SA	2016	Valorization	1.05	No
Generation company	ABARROTES ECONOMICOS SA	2016	Valorization	1.06	No
Generation company	ABARROTES ECONOMICOS SA	2017	Valorization	1.07	No
Generation company	ABARROTES ECONOMICOS SA	2017	Valorization	1.07	No
Generation company	ABARROTES ECONOMICOS SA	2017	Valorization	1.082	No
Generation company	ABARROTES ECONOMICOS SA	2016	Valorization	1.09	No
Generation company	ABARROTES ECONOMICOS SA	2018	Valorization	1.09	No
Generation company	ABARROTES ECONOMICOS SA	2016	Valorization	1.1	No
Generation company	ABARROTES ECONOMICOS SA	2017	Valorization	1.1	No
Generation company	ABARROTES ECONOMICOS SA	2016	Valorization	1.1	No
Generation company	ABARROTES ECONOMICOS SA	2015	Valorization	1.1	No
Generation company	ABARROTES ECONOMICOS SA	2016	Valorization	1.12	No
Generation company	ABARROTES ECONOMICOS SA	2017	Valorization	1.13	No
Generation company	ABARROTES ECONOMICOS SA	2016	Valorization	1.14	No
Generation company	ABARROTES ECONOMICOS SA	2016	Valorization	1.14	No
Generation company	ABARROTES ECONOMICOS SA	2017	Valorization	1.15	No
Generation company	ABARROTES ECONOMICOS SA	2016	Valorization	1.158	No
Generation company	ABARROTES ECONOMICOS SA	2016	Valorization	1.18	No
Generation company	ABARROTES ECONOMICOS SA	2017	Valorization	1.19	No
Generation company	ABARROTES ECONOMICOS SA	2016	Valorization	1.2	No
Generation company	ABARROTES ECONOMICOS SA	2017	Valorization	1.2	No
Generation company	ABARROTES ECONOMICOS SA	2015	Valorization	1.2	No
Generation company	ABARROTES ECONOMICOS SA	2017	Valorization	1.21	No
Generation company	ABARROTES ECONOMICOS SA	2018	Valorization	1.22	No
Generation company	ABARROTES ECONOMICOS SA	2018	Valorization	1.24	No
Generation company	ABARROTES ECONOMICOS SA	2017	Valorization	1.251	No
Generation company	ABARROTES ECONOMICOS SA	2018	Valorization	1.26	No
Generation company	ABARROTES ECONOMICOS SA	2016	Valorization	1.27	No
Generation company	ABARROTES ECONOMICOS SA	2017	Valorization	1.28	No
Generation company	ABARROTES ECONOMICOS SA	2017	Valorization	1.28	No
Generation company	ABARROTES ECONOMICOS SA	2016	Valorization	1.28	No
Generation company	ABARROTES ECONOMICOS SA	2017	Valorization	1.29	No
Generation company	ABARROTES ECONOMICOS SA	2017	Valorization	1.3	No
Generation company	ABARROTES ECONOMICOS SA	2018	Valorization	1.3	No
Generation company	ABARROTES ECONOMICOS SA	2016	Valorization	1.32	No
Generation company	ABARROTES ECONOMICOS SA	2017	Valorization	1.32	No
Generation company	ABARROTES ECONOMICOS SA	2018	Valorization	1.32	No
Generation company	ABARROTES ECONOMICOS SA	2015	Valorization	1.33	No
Generation company	ABARROTES ECONOMICOS SA	2015	Valorization	1.34	No
Generation company	ABARROTES ECONOMICOS SA	2018	Valorization	1.34	No
Generation company	ABARROTES ECONOMICOS SA	2016	Valorization	1.35	No
Generation company	ABARROTES ECONOMICOS SA	2019	Valorization	1.35	No
Generation company	ABARROTES ECONOMICOS SA	2017	Valorization	1.37	No
Generation company	ABARROTES ECONOMICOS SA	2017	Valorization	1.37	No
Generation company	ABARROTES ECONOMICOS SA	2017	Valorization	1.38	No
Generation company	ABARROTES ECONOMICOS SA	2016	Valorization	1.38	No
Generation company	ABARROTES ECONOMICOS SA	2018	Valorization	1.38	No
Generation company	ABARROTES ECONOMICOS SA	2017	Valorization	1.39	No
Generation company	ABARROTES ECONOMICOS SA	2017	Valorization	1.39	No
Generation company	ABARROTES ECONOMICOS SA	2018	Valorization	1.39	No
Generation company	ABARROTES ECONOMICOS SA	2017	Valorization	1.4	No
Generation company	ABARROTES ECONOMICOS SA	2017	Valorization	1.4	No
Generation company	ABARROTES ECONOMICOS SA	2017	Valorization	1.4	No
Generation company	ABARROTES ECONOMICOS SA	2015	Valorization	1.4	No
Generation company	ABARROTES ECONOMICOS SA	2017	Valorization	1.42	No
Generation company	ABARROTES ECONOMICOS SA	2016	Valorization	1.426	No
Generation company	ABARROTES ECONOMICOS SA	2019	Valorization	1.43	No
Generation company	ABARROTES ECONOMICOS SA	2018	Valorization	1.43	No
Generation company	ABARROTES ECONOMICOS SA	2016	Valorization	1.44	No
Generation company	ABARROTES ECONOMICOS SA	2017	Valorization	1.45	No
Generation company	ABARROTES ECONOMICOS SA	2017	Valorization	1.46	No
Generation company	ABARROTES ECONOMICOS SA	2018	Valorization	1.46	No
Generation company	ABARROTES ECONOMICOS SA	2016	Valorization	1.47	No
Generation company	ABARROTES ECONOMICOS SA	2017	Valorization	1.47	No
Generation company	ABARROTES ECONOMICOS SA	2016	Valorization	1.5	No
Generation company	ABARROTES ECONOMICOS SA	2017	Valorization	1.5	No
Generation company	ABARROTES ECONOMICOS SA	2019	Valorization	1.5	No
Generation company	ABARROTES ECONOMICOS SA	2017	Valorization	1.51	No
Generation company	ABARROTES ECONOMICOS SA	2017	Valorization	1.51	No
Generation company	ABARROTES ECONOMICOS SA	2016	Valorization	1.51	No
Generation company	ABARROTES ECONOMICOS SA	2017	Valorization	1.52	No
Generation company	ABARROTES ECONOMICOS SA	2018	Valorization	1.52	No
Generation company	ABARROTES ECONOMICOS SA	2018	Valorization	1.52	No
Generation company	ABARROTES ECONOMICOS SA	2016	Valorization	1.55	No
Generation company	ABARROTES ECONOMICOS SA	2017	Valorization	1.55	No
Generation company	ABARROTES ECONOMICOS SA	2018	Valorization	1.55	No
Generation company	ABARROTES ECONOMICOS SA	2015	Valorization	1.56	No
Generation company	ABARROTES ECONOMICOS SA	2017	Valorization	1.566	No
Generation company	ABARROTES ECONOMICOS SA	2016	Valorization	1.57	No
Generation company	ABARROTES ECONOMICOS SA	2017	Valorization	1.57	No
Generation company	ABARROTES ECONOMICOS SA	2017	Valorization	1.576	No
Generation company	ABARROTES ECONOMICOS SA	2016	Valorization	1.59	No
Generation company	ABARROTES ECONOMICOS SA	2016	Valorization	1.6	No
Generation company	ABARROTES ECONOMICOS SA	2015	Valorization	1.6	No
Generation company	ABARROTES ECONOMICOS SA	2018	Valorization	1.6	No
Generation company	ABARROTES ECONOMICOS SA	2015	Valorization	1.61	No
Generation company	ABARROTES ECONOMICOS SA	2018	Valorization	1.62	No
Generation company	ABARROTES ECONOMICOS SA	2017	Valorization	1.62	No
Generation company	ABARROTES ECONOMICOS SA	2015	Valorization	1.64	No
Generation company	ABARROTES ECONOMICOS SA	2017	Valorization	1.64	No
Generation company	ABARROTES ECONOMICOS SA	2017	Valorization	1.65	No
Generation company	ABARROTES ECONOMICOS SA	2017	Valorization	1.655	No
Generation company	ABARROTES ECONOMICOS SA	2017	Valorization	1.66	No
Generation company	ABARROTES ECONOMICOS SA	2016	Valorization	1.67	No
Generation company	ABARROTES ECONOMICOS SA	2018	Valorization	1.67	No
Generation company	ABARROTES ECONOMICOS SA	2015	Valorization	1.7	No
Generation company	ABARROTES ECONOMICOS SA	2015	Valorization	1.7	No
Generation company	ABARROTES ECONOMICOS SA	2017	Valorization	1.71	No
Generation company	ABARROTES ECONOMICOS SA	2017	Valorization	1.719	No
Generation company	ABARROTES ECONOMICOS SA	2017	Valorization	1.72	No
Generation company	ABARROTES ECONOMICOS SA	2017	Valorization	1.72	No
Generation company	ABARROTES ECONOMICOS SA	2017	Valorization	1.73	No
Generation company	ABARROTES ECONOMICOS SA	2015	Valorization	1.74	No
Generation company	ABARROTES ECONOMICOS SA	2016	Valorization	1.74	No
Generation company	ABARROTES ECONOMICOS SA	2017	Valorization	1.744	No
Generation company	ABARROTES ECONOMICOS SA	2015	Valorization	1.76	No
Generation company	ABARROTES ECONOMICOS SA	2015	Valorization	1.76	No
Generation company	ABARROTES ECONOMICOS SA	2017	Valorization	1.792	No
Generation company	ABARROTES ECONOMICOS SA	2018	Valorization	1.8	No
Generation company	ABARROTES ECONOMICOS SA	2016	Valorization	1.8	No
Generation company	ABARROTES ECONOMICOS SA	2016	Valorization	1.8	No
Generation company	ABARROTES ECONOMICOS SA	2018	Valorization	1.84	No
Generation company	ABARROTES ECONOMICOS SA	2016	Valorization	1.86	No
Generation company	ABARROTES ECONOMICOS SA	2017	Valorization	1.87	No
Generation company	ABARROTES ECONOMICOS SA	2018	Valorization	1.87	No
Generation company	ABARROTES ECONOMICOS SA	2017	Valorization	1.872	No
Generation company	ABARROTES ECONOMICOS SA	2017	Valorization	1.88	No
Generation company	ABARROTES ECONOMICOS SA	2017	Valorization	1.88	No
Generation company	ABARROTES ECONOMICOS SA	2017	Valorization	1.887	No
Generation company	ABARROTES ECONOMICOS SA	2016	Valorization	1.9	No
Generation company	ABARROTES ECONOMICOS SA	2015	Valorization	1.9	No
Generation company	ABARROTES ECONOMICOS SA	2016	Valorization	1.908	No
Generation company	ABARROTES ECONOMICOS SA	2017	Valorization	1.91	No
Generation company	ABARROTES ECONOMICOS SA	2017	Valorization	1.92	No
Generation company	ABARROTES ECONOMICOS SA	2016	Valorization	1.94	No
Generation company	ABARROTES ECONOMICOS SA	2017	Valorization	1.94	No
Generation company	ABARROTES ECONOMICOS SA	2015	Valorization	1.96	No
Generation company	ABARROTES ECONOMICOS SA	2019	Valorization	1.984	No
Generation company	ABARROTES ECONOMICOS SA	2018	Valorization	1.99	No
Generation company	ABARROTES ECONOMICOS SA	2015	Valorization	2	No
Generation company	ABARROTES ECONOMICOS SA	2016	Valorization	2.02	No
Generation company	ABARROTES ECONOMICOS SA	2017	Valorization	2.04	No
Generation company	ABARROTES ECONOMICOS SA	2019	Valorization	2.042	No
Generation company	ABARROTES ECONOMICOS SA	2018	Valorization	2.06	No
Generation company	ABARROTES ECONOMICOS SA	2017	Valorization	2.08	No
Generation company	ABARROTES ECONOMICOS SA	2018	Valorization	2.08	No
Generation company	ABARROTES ECONOMICOS SA	2017	Valorization	2.09	No
Generation company	ABARROTES ECONOMICOS SA	2018	Valorization	2.1	No
Generation company	ABARROTES ECONOMICOS SA	2015	Valorization	2.1	No
Generation company	ABARROTES ECONOMICOS SA	2019	Valorization	2.112	No
Generation company	ABARROTES ECONOMICOS SA	2017	Valorization	2.13	No
Generation company	ABARROTES ECONOMICOS SA	2017	Valorization	2.13	No
Generation company	ABARROTES ECONOMICOS SA	2016	Valorization	2.14	No
Generation company	ABARROTES ECONOMICOS SA	2018	Valorization	2.14	No
Generation company	ABARROTES ECONOMICOS SA	2016	Valorization	2.15	No
Generation company	ABARROTES ECONOMICOS SA	2017	Valorization	2.16	No
Generation company	ABARROTES ECONOMICOS SA	2015	Valorization	2.16	No
Generation company	ABARROTES ECONOMICOS SA	2019	Valorization	2.166	No
Generation company	ABARROTES ECONOMICOS SA	2019	Valorization	2.17	No
Generation company	ABARROTES ECONOMICOS SA	2019	Valorization	2.18	No
Generation company	ABARROTES ECONOMICOS SA	2018	Valorization	2.19	No
Generation company	ABARROTES ECONOMICOS SA	2015	Valorization	2.2	No
Generation company	ABARROTES ECONOMICOS SA	2017	Valorization	2.21	No
Generation company	ABARROTES ECONOMICOS SA	2017	Valorization	2.21	No
Generation company	ABARROTES ECONOMICOS SA	2016	Valorization	2.24	No
Generation company	ABARROTES ECONOMICOS SA	2016	Valorization	2.25	No
Generation company	ABARROTES ECONOMICOS SA	2017	Valorization	2.255	No
Generation company	ABARROTES ECONOMICOS SA	2017	Valorization	2.26	No
Generation company	ABARROTES ECONOMICOS SA	2017	Valorization	2.28	No
Generation company	ABARROTES ECONOMICOS SA	2019	Valorization	2.289	No
Generation company	ABARROTES ECONOMICOS SA	2017	Valorization	2.3	No
Generation company	ABARROTES ECONOMICOS SA	2019	Valorization	2.301	No
Generation company	ABARROTES ECONOMICOS SA	2016	Valorization	2.31	No
Generation company	ABARROTES ECONOMICOS SA	2016	Valorization	2.34	No
Generation company	ABARROTES ECONOMICOS SA	2016	Valorization	2.36	No
Generation company	ABARROTES ECONOMICOS SA	2016	Valorization	2.372	No
Generation company	ABARROTES ECONOMICOS SA	2017	Valorization	2.38	No
Generation company	ABARROTES ECONOMICOS SA	2017	Valorization	2.38	No
Generation company	ABARROTES ECONOMICOS SA	2016	Valorization	2.38	No
Generation company	ABARROTES ECONOMICOS SA	2016	Valorization	2.4	No
Generation company	ABARROTES ECONOMICOS SA	2015	Valorization	2.4	No
Generation company	ABARROTES ECONOMICOS SA	2019	Valorization	2.41	No
Generation company	ABARROTES ECONOMICOS SA	2016	Valorization	2.447	No
Generation company	ABARROTES ECONOMICOS SA	2016	Valorization	2.45	No
Generation company	ABARROTES ECONOMICOS SA	2017	Valorization	2.46	No
Generation company	ABARROTES ECONOMICOS SA	2017	Valorization	2.49	No
Generation company	ABARROTES ECONOMICOS SA	2016	Valorization	2.49	No
Generation company	ABARROTES ECONOMICOS SA	2017	Valorization	2.5	No
Generation company	ABARROTES ECONOMICOS SA	2017	Valorization	2.5	No
Generation company	ABARROTES ECONOMICOS SA	2015	Valorization	2.52	No
Generation company	ABARROTES ECONOMICOS SA	2017	Valorization	2.53	No
Generation company	ABARROTES ECONOMICOS SA	2019	Valorization	2.543	No
Generation company	ABARROTES ECONOMICOS SA	2017	Valorization	2.55	No
Generation company	ABARROTES ECONOMICOS SA	2016	Valorization	2.553	No
Generation company	ABARROTES ECONOMICOS SA	2017	Valorization	2.56	No
Generation company	ABARROTES ECONOMICOS SA	2015	Valorization	2.57	No
Generation company	ABARROTES ECONOMICOS SA	2019	Valorization	2.59	No
Generation company	ABARROTES ECONOMICOS SA	2015	Valorization	2.6	No
Generation company	ABARROTES ECONOMICOS SA	2018	Valorization	2.6	No
Generation company	ABARROTES ECONOMICOS SA	2016	Valorization	2.62	No
Generation company	ABARROTES ECONOMICOS SA	2017	Valorization	2.64	No
Generation company	ABARROTES ECONOMICOS SA	2017	Valorization	2.64	No
Generation company	ABARROTES ECONOMICOS SA	2017	Valorization	2.65	No
Generation company	ABARROTES ECONOMICOS SA	2019	Valorization	2.65	No
Generation company	ABARROTES ECONOMICOS SA	2017	Valorization	2.67	No
Generation company	ABARROTES ECONOMICOS SA	2016	Valorization	2.69	No
Generation company	ABARROTES ECONOMICOS SA	2018	Valorization	2.7	No
Generation company	ABARROTES ECONOMICOS SA	2017	Valorization	2.74	No
Generation company	ABARROTES ECONOMICOS SA	2017	Valorization	2.74	No
Generation company	ABARROTES ECONOMICOS SA	2017	Valorization	2.74	No
Generation company	ABARROTES ECONOMICOS SA	2017	Valorization	2.751	No
Generation company	ABARROTES ECONOMICOS SA	2017	Valorization	2.77	No
Generation company	ABARROTES ECONOMICOS SA	2017	Valorization	2.77	No
Generation company	ABARROTES ECONOMICOS SA	2016	Valorization	2.78	No
Generation company	ABARROTES ECONOMICOS SA	2017	Valorization	2.78	No
Generation company	ABARROTES ECONOMICOS SA	2016	Valorization	2.8	No
Generation company	ABARROTES ECONOMICOS SA	2015	Valorization	2.81	No
Generation company	ABARROTES ECONOMICOS SA	2018	Valorization	2.82	No
Generation company	ABARROTES ECONOMICOS SA	2018	Valorization	2.83	No
Generation company	ABARROTES ECONOMICOS SA	2016	Valorization	2.84	No
Generation company	ABARROTES ECONOMICOS SA	2018	Valorization	2.87	No
Generation company	ABARROTES ECONOMICOS SA	2016	Valorization	2.9	No
Generation company	ABARROTES ECONOMICOS SA	2017	Valorization	2.94	No
Generation company	ABARROTES ECONOMICOS SA	2016	Valorization	2.96	No
Generation company	ABARROTES ECONOMICOS SA	2018	Valorization	2.97	No
Generation company	ABARROTES ECONOMICOS SA	2018	Valorization	2.98	No
Generation company	ABARROTES ECONOMICOS SA	2016	Valorization	2.99	No
Generation company	ABARROTES ECONOMICOS SA	2018	Valorization	3	No
Generation company	ABARROTES ECONOMICOS SA	2015	Valorization	3	No
Generation company	ABARROTES ECONOMICOS SA	2018	Valorization	3.01	No
Generation company	ABARROTES ECONOMICOS SA	2019	Valorization	3.015	No
Generation company	ABARROTES ECONOMICOS SA	2017	Valorization	3.04	No
Generation company	ABARROTES ECONOMICOS SA	2017	Valorization	3.06	No
Generation company	ABARROTES ECONOMICOS SA	2017	Valorization	3.07	No
Generation company	ABARROTES ECONOMICOS SA	2017	Valorization	3.09	No
Generation company	ABARROTES ECONOMICOS SA	2016	Valorization	3.09	No
Generation company	ABARROTES ECONOMICOS SA	2017	Valorization	3.13	No
Generation company	ABARROTES ECONOMICOS SA	2017	Valorization	3.13	No
Generation company	ABARROTES ECONOMICOS SA	2018	Valorization	3.13	No
Generation company	ABARROTES ECONOMICOS SA	2017	Valorization	3.14	No
Generation company	ABARROTES ECONOMICOS SA	2017	Valorization	3.145	No
Generation company	ABARROTES ECONOMICOS SA	2017	Valorization	3.15	No
Generation company	ABARROTES ECONOMICOS SA	2016	Valorization	3.199	No
Generation company	ABARROTES ECONOMICOS SA	2017	Valorization	3.22	No
Generation company	ABARROTES ECONOMICOS SA	2017	Valorization	3.223	No
Generation company	ABARROTES ECONOMICOS SA	2017	Valorization	3.31	No
Generation company	ABARROTES ECONOMICOS SA	2018	Valorization	3.32	No
Generation company	ABARROTES ECONOMICOS SA	2015	Valorization	3.33	No
Generation company	ABARROTES ECONOMICOS SA	2018	Valorization	3.33	No
Generation company	ABARROTES ECONOMICOS SA	2016	Valorization	3.337	No
Generation company	ABARROTES ECONOMICOS SA	2017	Valorization	3.35	No
Generation company	ABARROTES ECONOMICOS SA	2016	Valorization	3.365	No
Generation company	ABARROTES ECONOMICOS SA	2017	Valorization	3.429	No
Generation company	ABARROTES ECONOMICOS SA	2016	Valorization	3.429	No
Generation company	ABARROTES ECONOMICOS SA	2017	Valorization	3.48	No
Generation company	ABARROTES ECONOMICOS SA	2017	Valorization	3.52	No
Generation company	ABARROTES ECONOMICOS SA	2017	Valorization	3.52	No
Generation company	ABARROTES ECONOMICOS SA	2017	Valorization	3.53	No
Generation company	ABARROTES ECONOMICOS SA	2019	Valorization	3.544	No
Generation company	ABARROTES ECONOMICOS SA	2016	Valorization	3.55	No
Generation company	ABARROTES ECONOMICOS SA	2015	Valorization	3.56	No
Generation company	ABARROTES ECONOMICOS SA	2016	Valorization	3.57	No
Generation company	ABARROTES ECONOMICOS SA	2015	Valorization	3.58	No
Generation company	ABARROTES ECONOMICOS SA	2018	Valorization	3.58	No
Generation company	ABARROTES ECONOMICOS SA	2016	Valorization	3.6	No
Generation company	ABARROTES ECONOMICOS SA	2015	Valorization	3.6	No
Generation company	ABARROTES ECONOMICOS SA	2017	Valorization	3.61	No
Generation company	ABARROTES ECONOMICOS SA	2017	Valorization	3.63	No
Generation company	ABARROTES ECONOMICOS SA	2019	Valorization	3.644	No
Generation company	ABARROTES ECONOMICOS SA	2018	Valorization	3.65	No
Generation company	ABARROTES ECONOMICOS SA	2015	Valorization	3.7	No
Generation company	ABARROTES ECONOMICOS SA	2019	Valorization	3.717	No
Generation company	ABARROTES ECONOMICOS SA	2018	Valorization	3.72	No
Generation company	ABARROTES ECONOMICOS SA	2016	Valorization	3.74	No
Generation company	ABARROTES ECONOMICOS SA	2015	Valorization	3.75	No
Generation company	ABARROTES ECONOMICOS SA	2019	Valorization	3.769	No
Generation company	ABARROTES ECONOMICOS SA	2015	Valorization	3.8	No
Generation company	ABARROTES ECONOMICOS SA	2019	Valorization	3.825	No
Generation company	ABARROTES ECONOMICOS SA	2016	Valorization	3.842	No
Generation company	ABARROTES ECONOMICOS SA	2017	Valorization	3.89	No
Generation company	ABARROTES ECONOMICOS SA	2017	Valorization	3.92	No
Generation company	ABARROTES ECONOMICOS SA	2017	Valorization	3.98	No
Generation company	ABARROTES ECONOMICOS SA	2019	Valorization	3.98	No
Generation company	ABARROTES ECONOMICOS SA	2017	Valorization	4	No
Generation company	ABARROTES ECONOMICOS SA	2016	Valorization	4	No
Generation company	ABARROTES ECONOMICOS SA	2018	Valorization	4.01	No
Generation company	ABARROTES ECONOMICOS SA	2018	Valorization	4.04	No
Generation company	ABARROTES ECONOMICOS SA	2019	Valorization	4.072	No
Generation company	ABARROTES ECONOMICOS SA	2017	Valorization	4.08	No
Generation company	ABARROTES ECONOMICOS SA	2015	Valorization	4.1	No
Generation company	ABARROTES ECONOMICOS SA	2016	Valorization	4.1	No
Generation company	ABARROTES ECONOMICOS SA	2016	Valorization	4.146	No
Generation company	ABARROTES ECONOMICOS SA	2017	Valorization	4.16	No
Generation company	ABARROTES ECONOMICOS SA	2016	Valorization	4.17	No
Generation company	ABARROTES ECONOMICOS SA	2019	Valorization	4.171	No
Generation company	ABARROTES ECONOMICOS SA	2019	Valorization	4.18	No
Generation company	ABARROTES ECONOMICOS SA	2017	Valorization	4.223	No
Generation company	ABARROTES ECONOMICOS SA	2018	Valorization	4.25	No
Generation company	ABARROTES ECONOMICOS SA	2017	Valorization	4.26	No
Generation company	ABARROTES ECONOMICOS SA	2018	Valorization	4.27	No
Generation company	ABARROTES ECONOMICOS SA	2017	Valorization	4.306	No
Generation company	ABARROTES ECONOMICOS SA	2019	Valorization	4.31	No
Generation company	ABARROTES ECONOMICOS SA	2019	Valorization	4.311	No
Generation company	ABARROTES ECONOMICOS SA	2019	Valorization	4.323	No
Generation company	ABARROTES ECONOMICOS SA	2019	Valorization	4.335	No
Generation company	ABARROTES ECONOMICOS SA	2019	Valorization	4.339	No
Generation company	ABARROTES ECONOMICOS SA	2015	Valorization	4.35	No
Generation company	ABARROTES ECONOMICOS SA	2019	Valorization	4.366	No
Generation company	ABARROTES ECONOMICOS SA	2019	Valorization	4.382	No
Generation company	ABARROTES ECONOMICOS SA	2017	Valorization	4.383	No
Generation company	ABARROTES ECONOMICOS SA	2016	Valorization	4.43	No
Generation company	ABARROTES ECONOMICOS SA	2017	Valorization	4.44	No
Generation company	ABARROTES ECONOMICOS SA	2015	Valorization	4.45	No
Generation company	ABARROTES ECONOMICOS SA	2017	Valorization	4.47	No
Generation company	ABARROTES ECONOMICOS SA	2017	Valorization	4.47	No
Generation company	ABARROTES ECONOMICOS SA	2017	Valorization	4.496	No
Generation company	ABARROTES ECONOMICOS SA	2019	Valorization	4.5	No
Generation company	ABARROTES ECONOMICOS SA	2018	Valorization	4.5	No
Generation company	ABARROTES ECONOMICOS SA	2019	Valorization	4.51	No
Generation company	ABARROTES ECONOMICOS SA	2019	Valorization	4.51	No
Generation company	ABARROTES ECONOMICOS SA	2016	Valorization	4.525	No
Generation company	ABARROTES ECONOMICOS SA	2018	Valorization	4.55	No
Generation company	ABARROTES ECONOMICOS SA	2019	Valorization	4.573	No
Generation company	ABARROTES ECONOMICOS SA	2019	Valorization	4.597	No
Generation company	ABARROTES ECONOMICOS SA	2017	Valorization	4.6	No
Generation company	ABARROTES ECONOMICOS SA	2016	Valorization	4.605	No
Generation company	ABARROTES ECONOMICOS SA	2017	Valorization	4.62	No
Generation company	ABARROTES ECONOMICOS SA	2017	Valorization	4.639	No
Generation company	ABARROTES ECONOMICOS SA	2017	Valorization	4.65	No
Generation company	ABARROTES ECONOMICOS SA	2019	Valorization	4.656	No
Generation company	ABARROTES ECONOMICOS SA	2019	Valorization	4.691	No
Generation company	ABARROTES ECONOMICOS SA	2019	Valorization	4.694	No
Generation company	ABARROTES ECONOMICOS SA	2019	Valorization	4.7	No
Generation company	ABARROTES ECONOMICOS SA	2017	Valorization	4.71	No
Generation company	ABARROTES ECONOMICOS SA	2017	Valorization	4.72	No
Generation company	ABARROTES ECONOMICOS SA	2019	Valorization	4.746	No
Generation company	ABARROTES ECONOMICOS SA	2019	Valorization	4.772	No
Generation company	ABARROTES ECONOMICOS SA	2017	Valorization	4.804	No
Generation company	ABARROTES ECONOMICOS SA	2017	Valorization	4.83	No
Generation company	ABARROTES ECONOMICOS SA	2017	Valorization	4.836	No
Generation company	ABARROTES ECONOMICOS SA	2019	Valorization	4.84	No
Generation company	ABARROTES ECONOMICOS SA	2017	Valorization	4.84	No
Generation company	ABARROTES ECONOMICOS SA	2019	Valorization	4.9	No
Generation company	ABARROTES ECONOMICOS SA	2015	Valorization	4.9	No
Generation company	ABARROTES ECONOMICOS SA	2019	Valorization	4.911	No
Generation company	ABARROTES ECONOMICOS SA	2017	Valorization	4.94	No
Generation company	ABARROTES ECONOMICOS SA	2016	Valorization	4.97	No
Generation company	ABARROTES ECONOMICOS SA	2018	Valorization	4.99	No
Generation company	ABARROTES ECONOMICOS SA	2016	Valorization	5	No
Generation company	ABARROTES ECONOMICOS SA	2015	Valorization	5	No
Generation company	ABARROTES ECONOMICOS SA	2015	Valorization	5	No
Generation company	ABARROTES ECONOMICOS SA	2015	Valorization	5	No
Generation company	ABARROTES ECONOMICOS SA	2017	Valorization	5.015	No
Generation company	ABARROTES ECONOMICOS SA	2019	Valorization	5.029	No
Generation company	ABARROTES ECONOMICOS SA	2017	Valorization	5.03	No
Generation company	ABARROTES ECONOMICOS SA	2017	Valorization	5.052	No
Generation company	ABARROTES ECONOMICOS SA	2016	Valorization	5.076	No
Generation company	ABARROTES ECONOMICOS SA	2019	Valorization	5.092	No
Generation company	ABARROTES ECONOMICOS SA	2017	Valorization	5.11	No
Generation company	ABARROTES ECONOMICOS SA	2019	Valorization	5.139	No
Generation company	ABARROTES ECONOMICOS SA	2016	Valorization	5.168	No
Generation company	ABARROTES ECONOMICOS SA	2016	Valorization	5.174	No
Generation company	ABARROTES ECONOMICOS SA	2016	Valorization	5.178	No
Generation company	ABARROTES ECONOMICOS SA	2019	Valorization	5.19	No
Generation company	ABARROTES ECONOMICOS SA	2015	Valorization	5.2	No
Generation company	ABARROTES ECONOMICOS SA	2016	Valorization	5.25	No
Generation company	ABARROTES ECONOMICOS SA	2019	Valorization	5.281	No
Generation company	ABARROTES ECONOMICOS SA	2016	Valorization	5.3	No
Generation company	ABARROTES ECONOMICOS SA	2017	Valorization	5.318	No
Generation company	ABARROTES ECONOMICOS SA	2016	Valorization	5.32	No
Generation company	ABARROTES ECONOMICOS SA	2017	Valorization	5.37	No
Generation company	ABARROTES ECONOMICOS SA	2019	Valorization	5.37	No
Generation company	ABARROTES ECONOMICOS SA	2018	Valorization	5.38	No
Generation company	ABARROTES ECONOMICOS SA	2015	Valorization	5.4	No
Generation company	ABARROTES ECONOMICOS SA	2016	Valorization	5.41	No
Generation company	ABARROTES ECONOMICOS SA	2019	Valorization	5.429	No
Generation company	ABARROTES ECONOMICOS SA	2019	Valorization	5.43	No
Generation company	ABARROTES ECONOMICOS SA	2016	Valorization	5.44	No
Generation company	ABARROTES ECONOMICOS SA	2017	Valorization	5.47	No
Generation company	ABARROTES ECONOMICOS SA	2016	Valorization	5.477	No
Generation company	ABARROTES ECONOMICOS SA	2016	Valorization	5.5	No
Generation company	ABARROTES ECONOMICOS SA	2016	Valorization	5.569	No
Generation company	ABARROTES ECONOMICOS SA	2017	Valorization	5.58	No
Generation company	ABARROTES ECONOMICOS SA	2019	Valorization	5.605	No
Generation company	ABARROTES ECONOMICOS SA	2017	Valorization	5.625	No
Generation company	ABARROTES ECONOMICOS SA	2019	Valorization	5.664	No
Generation company	ABARROTES ECONOMICOS SA	2019	Valorization	5.7	No
Generation company	ABARROTES ECONOMICOS SA	2019	Valorization	5.715	No
Generation company	ABARROTES ECONOMICOS SA	2017	Valorization	5.73	No
Generation company	ABARROTES ECONOMICOS SA	2018	Valorization	5.74	No
Generation company	ABARROTES ECONOMICOS SA	2017	Valorization	5.748	No
Generation company	ABARROTES ECONOMICOS SA	2015	Valorization	5.77	No
Generation company	ABARROTES ECONOMICOS SA	2018	Valorization	5.79	No
Generation company	ABARROTES ECONOMICOS SA	2016	Valorization	5.8	No
Generation company	ABARROTES ECONOMICOS SA	2017	Valorization	5.81	No
Generation company	ABARROTES ECONOMICOS SA	2016	Valorization	5.811	No
Generation company	ABARROTES ECONOMICOS SA	2019	Valorization	5.813	No
Generation company	ABARROTES ECONOMICOS SA	2019	Valorization	5.85	No
Generation company	ABARROTES ECONOMICOS SA	2019	Valorization	5.87	No
Generation company	ABARROTES ECONOMICOS SA	2016	Valorization	5.893	No
Generation company	ABARROTES ECONOMICOS SA	2018	Valorization	5.93	No
Generation company	ABARROTES ECONOMICOS SA	2016	Valorization	5.946	No
Generation company	ABARROTES ECONOMICOS SA	2019	Valorization	5.95	No
Generation company	ABARROTES ECONOMICOS SA	2019	Valorization	5.981	No
Generation company	ABARROTES ECONOMICOS SA	2019	Valorization	5.99	No
Generation company	ABARROTES ECONOMICOS SA	2015	Valorization	6	No
Generation company	ABARROTES ECONOMICOS SA	2019	Valorization	6	No
Generation company	ABARROTES ECONOMICOS SA	2016	Valorization	6.033	No
Generation company	ABARROTES ECONOMICOS SA	2019	Valorization	6.043	No
Generation company	ABARROTES ECONOMICOS SA	2017	Valorization	6.078	No
Generation company	ABARROTES ECONOMICOS SA	2017	Valorization	6.182	No
Generation company	ABARROTES ECONOMICOS SA	2017	Valorization	6.183	No
Generation company	ABARROTES ECONOMICOS SA	2018	Valorization	6.19	No
Generation company	ABARROTES ECONOMICOS SA	2017	Valorization	6.25	No
Generation company	ABARROTES ECONOMICOS SA	2015	Valorization	6.3	No
Generation company	ABARROTES ECONOMICOS SA	2019	Valorization	6.318	No
Generation company	ABARROTES ECONOMICOS SA	2019	Valorization	6.32	No
Generation company	ABARROTES ECONOMICOS SA	2019	Valorization	6.32	No
Generation company	ABARROTES ECONOMICOS SA	2019	Valorization	6.327	No
Generation company	ABARROTES ECONOMICOS SA	2018	Valorization	6.33	No
Generation company	ABARROTES ECONOMICOS SA	2018	Valorization	6.33	No
Generation company	ABARROTES ECONOMICOS SA	2016	Valorization	6.35	No
Generation company	ABARROTES ECONOMICOS SA	2019	Valorization	6.35	No
Generation company	ABARROTES ECONOMICOS SA	2019	Valorization	6.357	No
Generation company	ABARROTES ECONOMICOS SA	2016	Valorization	6.36	No
Generation company	ABARROTES ECONOMICOS SA	2019	Valorization	6.384	No
Generation company	ABARROTES ECONOMICOS SA	2019	Valorization	6.41	No
Generation company	ABARROTES ECONOMICOS SA	2018	Valorization	6.44	No
Generation company	ABARROTES ECONOMICOS SA	2018	Valorization	6.45	No
Generation company	ABARROTES ECONOMICOS SA	2019	Valorization	6.465	No
Generation company	ABARROTES ECONOMICOS SA	2019	Valorization	6.489	No
Generation company	ABARROTES ECONOMICOS SA	2016	Valorization	6.5	No
Generation company	ABARROTES ECONOMICOS SA	2016	Valorization	6.51	No
Generation company	ABARROTES ECONOMICOS SA	2019	Valorization	6.529	No
Generation company	ABARROTES ECONOMICOS SA	2015	Valorization	6.54	No
Generation company	ABARROTES ECONOMICOS SA	2015	Valorization	6.6	No
Generation company	ABARROTES ECONOMICOS SA	2015	Valorization	6.6	No
Generation company	ABARROTES ECONOMICOS SA	2019	Valorization	6.648	No
Generation company	ABARROTES ECONOMICOS SA	2017	Valorization	6.655	No
Generation company	ABARROTES ECONOMICOS SA	2017	Valorization	6.668	No
Generation company	ABARROTES ECONOMICOS SA	2019	Valorization	6.698	No
Generation company	ABARROTES ECONOMICOS SA	2017	Valorization	6.72	No
Generation company	ABARROTES ECONOMICOS SA	2016	Valorization	6.72	No
Generation company	ABARROTES ECONOMICOS SA	2017	Valorization	6.731	No
Generation company	ABARROTES ECONOMICOS SA	2019	Valorization	6.751	No
Generation company	ABARROTES ECONOMICOS SA	2016	Valorization	6.753	No
Generation company	ABARROTES ECONOMICOS SA	2019	Valorization	6.816	No
Generation company	ABARROTES ECONOMICOS SA	2019	Valorization	6.829	No
Generation company	ABARROTES ECONOMICOS SA	2018	Valorization	6.83	No
Generation company	ABARROTES ECONOMICOS SA	2016	Valorization	6.86	No
Generation company	ABARROTES ECONOMICOS SA	2017	Valorization	6.871	No
Generation company	ABARROTES ECONOMICOS SA	2016	Valorization	7.069	No
Generation company	ABARROTES ECONOMICOS SA	2017	Valorization	7.086	No
Generation company	ABARROTES ECONOMICOS SA	2019	Valorization	7.145	No
Generation company	ABARROTES ECONOMICOS SA	2017	Valorization	7.2	No
Generation company	ABARROTES ECONOMICOS SA	2016	Valorization	7.2	No
Generation company	ABARROTES ECONOMICOS SA	2016	Valorization	7.245	No
Generation company	ABARROTES ECONOMICOS SA	2019	Valorization	7.269	No
Generation company	ABARROTES ECONOMICOS SA	2017	Valorization	7.304	No
Generation company	ABARROTES ECONOMICOS SA	2017	Valorization	7.335	No
Generation company	ABARROTES ECONOMICOS SA	2016	Valorization	7.34	No
Generation company	ABARROTES ECONOMICOS SA	2016	Valorization	7.35	No
Generation company	ABARROTES ECONOMICOS SA	2016	Valorization	7.39	No
Generation company	ABARROTES ECONOMICOS SA	2016	Valorization	7.39	No
Generation company	ABARROTES ECONOMICOS SA	2016	Valorization	7.4	No
Generation company	ABARROTES ECONOMICOS SA	2017	Valorization	7.415	No
Generation company	ABARROTES ECONOMICOS SA	2017	Valorization	7.47	No
Generation company	ABARROTES ECONOMICOS SA	2016	Valorization	7.525	No
Generation company	ABARROTES ECONOMICOS SA	2017	Valorization	7.527	No
Generation company	ABARROTES ECONOMICOS SA	2017	Valorization	7.54	No
Generation company	ABARROTES ECONOMICOS SA	2017	Valorization	7.563	No
Generation company	ABARROTES ECONOMICOS SA	2016	Valorization	7.6	No
Generation company	ABARROTES ECONOMICOS SA	2016	Valorization	7.6	No
Generation company	ABARROTES ECONOMICOS SA	2015	Valorization	7.63	No
Generation company	ABARROTES ECONOMICOS SA	2018	Valorization	7.66	No
Generation company	ABARROTES ECONOMICOS SA	2019	Valorization	7.662	No
Generation company	ABARROTES ECONOMICOS SA	2019	Valorization	7.671	No
Generation company	ABARROTES ECONOMICOS SA	2019	Valorization	7.682	No
Generation company	ABARROTES ECONOMICOS SA	2016	Valorization	7.69	No
Generation company	ABARROTES ECONOMICOS SA	2015	Valorization	7.7	No
Generation company	ABARROTES ECONOMICOS SA	2016	Valorization	7.765	No
Generation company	ABARROTES ECONOMICOS SA	2019	Valorization	7.805	No
Generation company	ABARROTES ECONOMICOS SA	2017	Valorization	7.805	No
Generation company	ABARROTES ECONOMICOS SA	2019	Valorization	7.827	No
Generation company	ABARROTES ECONOMICOS SA	2019	Valorization	7.83	No
Generation company	ABARROTES ECONOMICOS SA	2016	Valorization	7.831	No
Generation company	ABARROTES ECONOMICOS SA	2019	Valorization	7.838	No
Generation company	ABARROTES ECONOMICOS SA	2019	Valorization	7.85	No
Generation company	ABARROTES ECONOMICOS SA	2019	Valorization	7.856	No
Generation company	ABARROTES ECONOMICOS SA	2016	Valorization	7.9	No
Generation company	ABARROTES ECONOMICOS SA	2016	Valorization	7.92	No
Generation company	ABARROTES ECONOMICOS SA	2016	Valorization	7.926	No
Generation company	ABARROTES ECONOMICOS SA	2017	Valorization	7.96	No
Generation company	ABARROTES ECONOMICOS SA	2019	Valorization	7.96	No
Generation company	ABARROTES ECONOMICOS SA	2016	Valorization	8	No
Generation company	ABARROTES ECONOMICOS SA	2016	Valorization	8	No
Generation company	ABARROTES ECONOMICOS SA	2017	Valorization	8.023	No
Generation company	ABARROTES ECONOMICOS SA	2017	Valorization	8.064	No
Generation company	ABARROTES ECONOMICOS SA	2018	Valorization	8.07	No
Generation company	ABARROTES ECONOMICOS SA	2019	Valorization	8.19	No
Generation company	ABARROTES ECONOMICOS SA	2019	Valorization	8.26	No
Generation company	ABARROTES ECONOMICOS SA	2019	Valorization	8.284	No
Generation company	ABARROTES ECONOMICOS SA	2017	Valorization	8.359	No
Generation company	ABARROTES ECONOMICOS SA	2018	Valorization	8.38	No
Generation company	ABARROTES ECONOMICOS SA	2018	Valorization	8.39	No
Generation company	ABARROTES ECONOMICOS SA	2019	Valorization	8.421	No
Generation company	ABARROTES ECONOMICOS SA	2017	Valorization	8.428	No
Generation company	ABARROTES ECONOMICOS SA	2019	Valorization	8.467	No
Generation company	ABARROTES ECONOMICOS SA	2016	Valorization	8.5	No
Generation company	ABARROTES ECONOMICOS SA	2017	Valorization	8.525	No
Generation company	ABARROTES ECONOMICOS SA	2016	Valorization	8.59	No
Generation company	ABARROTES ECONOMICOS SA	2015	Valorization	8.6	No
Generation company	ABARROTES ECONOMICOS SA	2018	Valorization	8.61	No
Generation company	ABARROTES ECONOMICOS SA	2018	Valorization	8.62	No
Generation company	ABARROTES ECONOMICOS SA	2018	Valorization	8.65	No
Generation company	ABARROTES ECONOMICOS SA	2018	Valorization	8.69	No
Generation company	ABARROTES ECONOMICOS SA	2017	Valorization	8.727	No
Generation company	ABARROTES ECONOMICOS SA	2016	Valorization	8.8	No
Generation company	ABARROTES ECONOMICOS SA	2019	Valorization	8.853	No
Generation company	ABARROTES ECONOMICOS SA	2018	Valorization	8.86	No
Generation company	ABARROTES ECONOMICOS SA	2018	Valorization	8.9	No
Generation company	ABARROTES ECONOMICOS SA	2019	Valorization	8.943	No
Generation company	ABARROTES ECONOMICOS SA	2016	Valorization	8.967	No
Generation company	ABARROTES ECONOMICOS SA	2018	Valorization	9.09	No
Generation company	ABARROTES ECONOMICOS SA	2017	Valorization	9.159	No
Generation company	ABARROTES ECONOMICOS SA	2018	Valorization	9.24	No
Generation company	ABARROTES ECONOMICOS SA	2017	Valorization	9.26	No
Generation company	ABARROTES ECONOMICOS SA	2017	Valorization	9.337	No
Generation company	ABARROTES ECONOMICOS SA	2016	Valorization	9.5	No
Generation company	ABARROTES ECONOMICOS SA	2018	Valorization	9.56	No
Generation company	ABARROTES ECONOMICOS SA	2017	Valorization	9.57	No
Generation company	ABARROTES ECONOMICOS SA	2019	Valorization	9.735	No
Generation company	ABARROTES ECONOMICOS SA	2016	Valorization	9.767	No
Generation company	ABARROTES ECONOMICOS SA	2017	Valorization	9.81	No
Generation company	ABARROTES ECONOMICOS SA	2017	Valorization	9.81	No
Generation company	ABARROTES ECONOMICOS SA	2015	Valorization	9.9	No
Generation company	ABARROTES ECONOMICOS SA	2015	Valorization	9.9	No
Generation company	ABARROTES ECONOMICOS SA	2017	Valorization	9.921	No
Generation company	ABARROTES ECONOMICOS SA	2015	Valorization	10	No
Generation company	ABARROTES ECONOMICOS SA	2019	Valorization	10	No
Generation company	ABARROTES ECONOMICOS SA	2015	Valorization	10	No
Generation company	ABARROTES ECONOMICOS SA	2017	Valorization	10.01	No
Generation company	ABARROTES ECONOMICOS SA	2018	Valorization	10.04	No
Generation company	ABARROTES ECONOMICOS SA	2016	Valorization	10.32	No
Generation company	ABARROTES ECONOMICOS SA	2018	Valorization	10.44	No
Generation company	ABARROTES ECONOMICOS SA	2017	Valorization	10.45	No
Generation company	ABARROTES ECONOMICOS SA	2018	Valorization	10.5	No
Generation company	ABARROTES ECONOMICOS SA	2016	Valorization	10.55	No
Generation company	ABARROTES ECONOMICOS SA	2019	Valorization	10.632	No
Generation company	ABARROTES ECONOMICOS SA	2018	Valorization	10.65	No
Generation company	ABARROTES ECONOMICOS SA	2018	Valorization	10.72	No
Generation company	ABARROTES ECONOMICOS SA	2015	Valorization	10.8	No
Generation company	ABARROTES ECONOMICOS SA	2017	Valorization	10.814	No
Generation company	ABARROTES ECONOMICOS SA	2019	Valorization	10.917	No
Generation company	ABARROTES ECONOMICOS SA	2016	Valorization	10.92	No
Generation company	ABARROTES ECONOMICOS SA	2017	Valorization	10.946	No
Generation company	ABARROTES ECONOMICOS SA	2018	Valorization	10.95	No
Generation company	ABARROTES ECONOMICOS SA	2015	Valorization	11	No
Generation company	ABARROTES ECONOMICOS SA	2016	Valorization	11.06	No
Generation company	ABARROTES ECONOMICOS SA	2018	Valorization	11.21	No
Generation company	ABARROTES ECONOMICOS SA	2018	Valorization	11.22	No
Generation company	ABARROTES ECONOMICOS SA	2018	Valorization	11.22	No
Generation company	ABARROTES ECONOMICOS SA	2019	Valorization	11.242	No
Generation company	ABARROTES ECONOMICOS SA	2018	Valorization	11.25	No
Generation company	ABARROTES ECONOMICOS SA	2015	Valorization	11.3	No
Generation company	ABARROTES ECONOMICOS SA	2018	Valorization	11.39	No
Generation company	ABARROTES ECONOMICOS SA	2016	Valorization	11.5	No
Generation company	ABARROTES ECONOMICOS SA	2016	Valorization	11.5	No
Generation company	ABARROTES ECONOMICOS SA	2018	Valorization	11.54	No
Generation company	ABARROTES ECONOMICOS SA	2015	Valorization	11.7	No
Generation company	ABARROTES ECONOMICOS SA	2015	Valorization	11.7	No
Generation company	ABARROTES ECONOMICOS SA	2016	Valorization	11.781	No
Generation company	ABARROTES ECONOMICOS SA	2015	Valorization	11.8	No
Generation company	ABARROTES ECONOMICOS SA	2017	Valorization	11.88	No
Generation company	ABARROTES ECONOMICOS SA	2017	Valorization	11.93	No
Generation company	ABARROTES ECONOMICOS SA	2017	Valorization	12	No
Generation company	ABARROTES ECONOMICOS SA	2015	Valorization	12	No
Generation company	ABARROTES ECONOMICOS SA	2018	Valorization	12.13	No
Generation company	ABARROTES ECONOMICOS SA	2018	Valorization	12.38	No
Generation company	ABARROTES ECONOMICOS SA	2018	Valorization	12.44	No
Generation company	ABARROTES ECONOMICOS SA	2017	Valorization	12.461	No
Generation company	ABARROTES ECONOMICOS SA	2015	Valorization	12.5	No
Generation company	ABARROTES ECONOMICOS SA	2016	Valorization	12.54	No
Generation company	ABARROTES ECONOMICOS SA	2018	Valorization	12.62	No
Generation company	ABARROTES ECONOMICOS SA	2015	Valorization	12.7	No
Generation company	ABARROTES ECONOMICOS SA	2017	Valorization	12.76	No
Generation company	ABARROTES ECONOMICOS SA	2017	Valorization	12.96	No
Generation company	ABARROTES ECONOMICOS SA	2016	Valorization	13.1	No
Generation company	ABARROTES ECONOMICOS SA	2016	Valorization	13.2	No
Generation company	ABARROTES ECONOMICOS SA	2019	Valorization	13.36	No
Generation company	ABARROTES ECONOMICOS SA	2018	Valorization	13.45	No
Generation company	ABARROTES ECONOMICOS SA	2018	Valorization	13.8	No
Generation company	ABARROTES ECONOMICOS SA	2018	Valorization	13.95	No
Generation company	ABARROTES ECONOMICOS SA	2018	Valorization	14	No
Generation company	ABARROTES ECONOMICOS SA	2018	Valorization	14.1	No
Generation company	ABARROTES ECONOMICOS SA	2018	Valorization	14.25	No
Generation company	ABARROTES ECONOMICOS SA	2018	Valorization	14.57	No
Generation company	ABARROTES ECONOMICOS SA	2017	Valorization	14.59	No
Generation company	ABARROTES ECONOMICOS SA	2018	Valorization	14.63	No
Generation company	ABARROTES ECONOMICOS SA	2016	Valorization	15.1	No
Generation company	ABARROTES ECONOMICOS SA	2016	Valorization	15.1	No
Generation company	ABARROTES ECONOMICOS SA	2018	Valorization	15.16	No
Generation company	ABARROTES ECONOMICOS SA	2018	Valorization	15.29	No
Generation company	ABARROTES ECONOMICOS SA	2016	Valorization	15.3	No
Generation company	ABARROTES ECONOMICOS SA	2017	Valorization	15.36	No
Generation company	ABARROTES ECONOMICOS SA	2015	Valorization	15.5	No
Generation company	ABARROTES ECONOMICOS SA	2018	Valorization	15.5	No
Generation company	ABARROTES ECONOMICOS SA	2018	Valorization	15.56	No
Generation company	ABARROTES ECONOMICOS SA	2018	Valorization	16.27	No
Generation company	ABARROTES ECONOMICOS SA	2016	Valorization	16.4	No
Generation company	ABARROTES ECONOMICOS SA	2018	Valorization	16.66	No
Generation company	ABARROTES ECONOMICOS SA	2015	Valorization	16.8	No
Generation company	ABARROTES ECONOMICOS SA	2015	Valorization	17.1	No
Generation company	ABARROTES ECONOMICOS SA	2016	Valorization	17.235	No
Generation company	ABARROTES ECONOMICOS SA	2019	Valorization	17.241	No
Generation company	ABARROTES ECONOMICOS SA	2017	Valorization	17.29	No
Generation company	ABARROTES ECONOMICOS SA	2018	Valorization	17.37	No
Generation company	ABARROTES ECONOMICOS SA	2016	Valorization	17.8	No
Generation company	ABARROTES ECONOMICOS SA	2015	Valorization	17.9	No
Generation company	ABARROTES ECONOMICOS SA	2015	Valorization	18.3	No
Generation company	ABARROTES ECONOMICOS SA	2018	Valorization	18.44	No
Generation company	ABARROTES ECONOMICOS SA	2015	Valorization	18.7	No
Generation company	ABARROTES ECONOMICOS SA	2017	Valorization	19.01	No
Generation company	ABARROTES ECONOMICOS SA	2018	Valorization	19.08	No
Generation company	ABARROTES ECONOMICOS SA	2018	Valorization	19.18	No
Generation company	ABARROTES ECONOMICOS SA	2019	Valorization	19.355	No
Generation company	ABARROTES ECONOMICOS SA	2018	Valorization	19.45	No
Generation company	ABARROTES ECONOMICOS SA	2018	Valorization	19.9	No
Generation company	ABARROTES ECONOMICOS SA	2016	Valorization	19.925	No
Generation company	ABARROTES ECONOMICOS SA	2016	Valorization	20.1	No
Generation company	ABARROTES ECONOMICOS SA	2018	Valorization	20.23	No
Generation company	ABARROTES ECONOMICOS SA	2019	Valorization	20.42	No
Generation company	ABARROTES ECONOMICOS SA	2017	Valorization	20.42	No
Generation company	ABARROTES ECONOMICOS SA	2018	Valorization	20.81	No
Generation company	ABARROTES ECONOMICOS SA	2018	Valorization	20.82	No
Generation company	ABARROTES ECONOMICOS SA	2018	Valorization	21.5	No
Generation company	ABARROTES ECONOMICOS SA	2016	Valorization	21.6	No
Generation company	ABARROTES ECONOMICOS SA	2018	Valorization	21.74	No
Generation company	ABARROTES ECONOMICOS SA	2015	Valorization	21.8	No
Generation company	ABARROTES ECONOMICOS SA	2019	Valorization	21.958	No
Generation company	ABARROTES ECONOMICOS SA	2018	Valorization	22.14	No
Generation company	ABARROTES ECONOMICOS SA	2018	Valorization	22.35	No
Generation company	ABARROTES ECONOMICOS SA	2017	Valorization	22.92	No
Generation company	ABARROTES ECONOMICOS SA	2017	Valorization	22.96	No
Generation company	ABARROTES ECONOMICOS SA	2017	Valorization	22.97	No
Generation company	ABARROTES ECONOMICOS SA	2016	Valorization	23.3	No
Generation company	ABARROTES ECONOMICOS SA	2015	Valorization	23.3	No
Generation company	ABARROTES ECONOMICOS SA	2017	Valorization	23.365	No
Generation company	ABARROTES ECONOMICOS SA	2016	Valorization	23.6	No
Generation company	ABARROTES ECONOMICOS SA	2018	Valorization	23.66	No
Generation company	ABARROTES ECONOMICOS SA	2017	Valorization	24	No
Generation company	ABARROTES ECONOMICOS SA	2018	Valorization	24.05	No
Generation company	ABARROTES ECONOMICOS SA	2016	Valorization	24.2	No
Generation company	ABARROTES ECONOMICOS SA	2018	Valorization	24.38	No
Generation company	ABARROTES ECONOMICOS SA	2015	Valorization	24.5	No
Generation company	ABARROTES ECONOMICOS SA	2019	Valorization	24.707	No
Generation company	ABARROTES ECONOMICOS SA	2017	Valorization	25.62	No
Generation company	ABARROTES ECONOMICOS SA	2019	Valorization	25.75	No
Generation company	ABARROTES ECONOMICOS SA	2018	Valorization	26.02	No
Generation company	ABARROTES ECONOMICOS SA	2017	Valorization	26.274	No
Generation company	ABARROTES ECONOMICOS SA	2018	Valorization	26.39	No
Generation company	ABARROTES ECONOMICOS SA	2019	Valorization	26.42	No
Generation company	ABARROTES ECONOMICOS SA	2016	Valorization	26.5	No
Generation company	ABARROTES ECONOMICOS SA	2017	Valorization	26.6	No
Generation company	ABARROTES ECONOMICOS SA	2017	Valorization	26.66	No
Generation company	ABARROTES ECONOMICOS SA	2017	Valorization	26.754	No
Generation company	ABARROTES ECONOMICOS SA	2018	Valorization	26.86	No
Generation company	ABARROTES ECONOMICOS SA	2018	Valorization	26.877	No
Generation company	ABARROTES ECONOMICOS SA	2018	Valorization	27.02	No
Generation company	ABARROTES ECONOMICOS SA	2016	Valorization	27.8	No
Generation company	ABARROTES ECONOMICOS SA	2019	Valorization	28	No
Generation company	ABARROTES ECONOMICOS SA	2015	Valorization	28.1	No
Generation company	ABARROTES ECONOMICOS SA	2017	Valorization	28.294	No
Generation company	ABARROTES ECONOMICOS SA	2016	Valorization	28.7	No
Generation company	ABARROTES ECONOMICOS SA	2016	Valorization	28.7	No
Generation company	ABARROTES ECONOMICOS SA	2016	Valorization	28.7	No
Generation company	ABARROTES ECONOMICOS SA	2017	Valorization	29.084	No
Generation company	ABARROTES ECONOMICOS SA	2015	Valorization	29.1	No
Generation company	ABARROTES ECONOMICOS SA	2015	Valorization	29.2	No
Generation company	ABARROTES ECONOMICOS SA	2017	Valorization	29.58	No
Generation company	ABARROTES ECONOMICOS SA	2017	Valorization	29.661	No
Generation company	ABARROTES ECONOMICOS SA	2015	Valorization	30.2	No
Generation company	ABARROTES ECONOMICOS SA	2019	Valorization	30.208	No
Generation company	ABARROTES ECONOMICOS SA	2016	Valorization	31.382	No
Generation company	ABARROTES ECONOMICOS SA	2016	Valorization	31.7	No
Generation company	ABARROTES ECONOMICOS SA	2017	Valorization	31.835	No
Generation company	ABARROTES ECONOMICOS SA	2019	Valorization	31.84	No
Generation company	ABARROTES ECONOMICOS SA	2019	Valorization	32.105	No
Generation company	ABARROTES ECONOMICOS SA	2018	Valorization	32.15	No
Generation company	ABARROTES ECONOMICOS SA	2018	Valorization	32.23	No
Generation company	ABARROTES ECONOMICOS SA	2018	Valorization	32.36	No
Generation company	ABARROTES ECONOMICOS SA	2017	Valorization	32.46	No
Generation company	ABARROTES ECONOMICOS SA	2018	Valorization	32.65	No
Generation company	ABARROTES ECONOMICOS SA	2015	Valorization	32.7	No
Generation company	ABARROTES ECONOMICOS SA	2018	Valorization	32.74	No
Generation company	ABARROTES ECONOMICOS SA	2017	Valorization	33.59	No
Generation company	ABARROTES ECONOMICOS SA	2015	Valorization	33.9	No
Generation company	ABARROTES ECONOMICOS SA	2019	Valorization	34.099	No
Generation company	ABARROTES ECONOMICOS SA	2016	Valorization	34.4	No
Generation company	ABARROTES ECONOMICOS SA	2019	Valorization	34.435	No
Generation company	ABARROTES ECONOMICOS SA	2018	Valorization	34.53	No
Generation company	ABARROTES ECONOMICOS SA	2016	Valorization	34.9	No
Generation company	ABARROTES ECONOMICOS SA	2018	Valorization	34.9	No
Generation company	ABARROTES ECONOMICOS SA	2016	Valorization	35.1	No
Generation company	ABARROTES ECONOMICOS SA	2018	Valorization	35.28	No
Generation company	ABARROTES ECONOMICOS SA	2015	Valorization	35.3	No
Generation company	ABARROTES ECONOMICOS SA	2016	Valorization	35.6	No
Generation company	ABARROTES ECONOMICOS SA	2015	Valorization	35.6	No
Generation company	ABARROTES ECONOMICOS SA	2019	Valorization	35.78	No
Generation company	ABARROTES ECONOMICOS SA	2019	Valorization	35.82	No
Generation company	ABARROTES ECONOMICOS SA	2016	Valorization	35.86	No
Generation company	ABARROTES ECONOMICOS SA	2017	Valorization	36.26	No
Generation company	ABARROTES ECONOMICOS SA	2017	Valorization	36.36	No
Generation company	ABARROTES ECONOMICOS SA	2017	Valorization	36.53	No
Generation company	ABARROTES ECONOMICOS SA	2016	Valorization	36.6	No
Generation company	ABARROTES ECONOMICOS SA	2016	Valorization	36.8	No
Generation company	ABARROTES ECONOMICOS SA	2017	Valorization	37	No
Generation company	ABARROTES ECONOMICOS SA	2016	Valorization	37.358	No
Generation company	ABARROTES ECONOMICOS SA	2018	Valorization	37.63	No
Generation company	ABARROTES ECONOMICOS SA	2017	Valorization	37.64	No
Generation company	ABARROTES ECONOMICOS SA	2017	Valorization	37.67	No
Generation company	ABARROTES ECONOMICOS SA	2016	Valorization	37.87	No
Generation company	ABARROTES ECONOMICOS SA	2018	Valorization	37.89	No
Generation company	ABARROTES ECONOMICOS SA	2018	Valorization	38.07	No
Generation company	ABARROTES ECONOMICOS SA	2017	Valorization	38.38	No
Generation company	ABARROTES ECONOMICOS SA	2018	Valorization	38.41	No
Generation company	ABARROTES ECONOMICOS SA	2016	Valorization	38.6	No
Generation company	ABARROTES ECONOMICOS SA	2016	Valorization	38.7	No
Generation company	ABARROTES ECONOMICOS SA	2016	Valorization	38.7	No
Generation company	ABARROTES ECONOMICOS SA	2016	Valorization	38.787	No
Generation company	ABARROTES ECONOMICOS SA	2017	Valorization	38.803	No
Generation company	ABARROTES ECONOMICOS SA	2017	Valorization	38.945	No
Generation company	ABARROTES ECONOMICOS SA	2016	Valorization	39.1	No
Generation company	ABARROTES ECONOMICOS SA	2017	Valorization	39.14	No
Generation company	ABARROTES ECONOMICOS SA	2019	Valorization	39.437	No
Generation company	ABARROTES ECONOMICOS SA	2018	Valorization	39.58	No
Generation company	ABARROTES ECONOMICOS SA	2015	Valorization	39.7	No
Generation company	ABARROTES ECONOMICOS SA	2015	Valorization	39.8	No
Generation company	ABARROTES ECONOMICOS SA	2018	Valorization	39.94	No
Generation company	ABARROTES ECONOMICOS SA	2019	Valorization	39.95	No
Generation company	ABARROTES ECONOMICOS SA	2017	Valorization	40.148	No
Generation company	ABARROTES ECONOMICOS SA	2017	Valorization	40.53	No
Generation company	ABARROTES ECONOMICOS SA	2015	Valorization	40.6	No
Generation company	ABARROTES ECONOMICOS SA	2019	Valorization	41.031	No
Generation company	ABARROTES ECONOMICOS SA	2016	Valorization	41.1	No
Generation company	ABARROTES ECONOMICOS SA	2017	Valorization	41.37	No
Generation company	ABARROTES ECONOMICOS SA	2019	Valorization	41.601	No
Generation company	ABARROTES ECONOMICOS SA	2015	Valorization	41.7	No
Generation company	ABARROTES ECONOMICOS SA	2019	Valorization	41.72	No
Generation company	ABARROTES ECONOMICOS SA	2019	Valorization	41.91	No
Generation company	ABARROTES ECONOMICOS SA	2019	Valorization	41.93	No
Generation company	ABARROTES ECONOMICOS SA	2016	Valorization	41.94	No
Generation company	ABARROTES ECONOMICOS SA	2019	Valorization	41.982	No
Generation company	ABARROTES ECONOMICOS SA	2019	Valorization	42.55	No
Generation company	ABARROTES ECONOMICOS SA	2016	Valorization	42.58	No
Generation company	ABARROTES ECONOMICOS SA	2017	Valorization	42.69	No
Generation company	ABARROTES ECONOMICOS SA	2018	Valorization	43.28	No
Generation company	ABARROTES ECONOMICOS SA	2016	Valorization	43.327	No
Generation company	ABARROTES ECONOMICOS SA	2015	Valorization	43.4	No
Generation company	ABARROTES ECONOMICOS SA	2016	Valorization	43.5	No
Generation company	ABARROTES ECONOMICOS SA	2016	Valorization	43.529	No
Generation company	ABARROTES ECONOMICOS SA	2017	Valorization	43.716	No
Generation company	ABARROTES ECONOMICOS SA	2017	Valorization	44.63	No
Generation company	ABARROTES ECONOMICOS SA	2015	Valorization	44.7	No
Generation company	ABARROTES ECONOMICOS SA	2017	Valorization	44.806	No
Generation company	ABARROTES ECONOMICOS SA	2017	Valorization	44.92	No
Generation company	ABARROTES ECONOMICOS SA	2017	Valorization	44.996	No
Generation company	ABARROTES ECONOMICOS SA	2017	Valorization	45.18	No
Generation company	ABARROTES ECONOMICOS SA	2017	Valorization	45.39	No
Generation company	ABARROTES ECONOMICOS SA	2019	Valorization	45.41	No
Generation company	ABARROTES ECONOMICOS SA	2016	Valorization	45.5	No
Generation company	ABARROTES ECONOMICOS SA	2017	Valorization	45.52	No
Generation company	ABARROTES ECONOMICOS SA	2015	Valorization	45.6	No
Generation company	ABARROTES ECONOMICOS SA	2019	Valorization	45.655	No
Generation company	ABARROTES ECONOMICOS SA	2015	Valorization	45.7	No
Generation company	ABARROTES ECONOMICOS SA	2015	Valorization	45.9	No
Generation company	ABARROTES ECONOMICOS SA	2015	Valorization	46.1	No
Generation company	ABARROTES ECONOMICOS SA	2019	Valorization	46.16	No
Generation company	ABARROTES ECONOMICOS SA	2018	Valorization	46.25	No
Generation company	ABARROTES ECONOMICOS SA	2017	Valorization	46.32	No
Generation company	ABARROTES ECONOMICOS SA	2019	Valorization	46.337	No
Generation company	ABARROTES ECONOMICOS SA	2017	Valorization	46.53	No
Generation company	ABARROTES ECONOMICOS SA	2018	Valorization	46.641	No
Generation company	ABARROTES ECONOMICOS SA	2017	Valorization	46.65	No
Generation company	ABARROTES ECONOMICOS SA	2018	Valorization	46.83	No
Generation company	ABARROTES ECONOMICOS SA	2017	Valorization	46.89	No
Generation company	ABARROTES ECONOMICOS SA	2016	Valorization	47.332	No
Generation company	ABARROTES ECONOMICOS SA	2017	Valorization	47.34	No
Generation company	ABARROTES ECONOMICOS SA	2015	Valorization	47.4	No
Generation company	ABARROTES ECONOMICOS SA	2016	Valorization	47.489	No
Generation company	ABARROTES ECONOMICOS SA	2018	Valorization	47.7	No
Generation company	ABARROTES ECONOMICOS SA	2018	Valorization	47.85	No
Generation company	ABARROTES ECONOMICOS SA	2019	Valorization	47.885	No
Generation company	ABARROTES ECONOMICOS SA	2015	Valorization	47.9	No
Generation company	ABARROTES ECONOMICOS SA	2019	Valorization	48.057	No
Generation company	ABARROTES ECONOMICOS SA	2019	Valorization	48.111	No
Generation company	ABARROTES ECONOMICOS SA	2019	Valorization	48.199	No
Generation company	ABARROTES ECONOMICOS SA	2015	Valorization	48.4	No
Generation company	ABARROTES ECONOMICOS SA	2015	Valorization	48.5	No
Generation company	ABARROTES ECONOMICOS SA	2016	Valorization	48.59	No
Generation company	ABARROTES ECONOMICOS SA	2017	Valorization	48.593	No
Generation company	ABARROTES ECONOMICOS SA	2018	Valorization	48.69	No
Generation company	ABARROTES ECONOMICOS SA	2019	Valorization	48.905	No
Generation company	ABARROTES ECONOMICOS SA	2019	Valorization	49.115	No
Generation company	ABARROTES ECONOMICOS SA	2018	Valorization	49.23	No
Generation company	ABARROTES ECONOMICOS SA	2015	Valorization	49.4	No
Generation company	ABARROTES ECONOMICOS SA	2018	Valorization	49.51	No
Generation company	ABARROTES ECONOMICOS SA	2015	Valorization	49.7	No
Generation company	ABARROTES ECONOMICOS SA	2019	Valorization	49.92	No
Generation company	ABARROTES ECONOMICOS SA	2017	Valorization	50.062	No
Generation company	ABARROTES ECONOMICOS SA	2019	Valorization	50.269	No
Generation company	ABARROTES ECONOMICOS SA	2015	Valorization	50.3	No
Generation company	ABARROTES ECONOMICOS SA	2016	Valorization	50.36	No
Generation company	ABARROTES ECONOMICOS SA	2018	Valorization	50.41	No
Generation company	ABARROTES ECONOMICOS SA	2016	Valorization	50.52	No
Generation company	ABARROTES ECONOMICOS SA	2016	Valorization	50.6	No
Generation company	ABARROTES ECONOMICOS SA	2017	Valorization	50.709	No
Generation company	ABARROTES ECONOMICOS SA	2018	Valorization	50.73	No
Generation company	ABARROTES ECONOMICOS SA	2018	Valorization	50.78	No
Generation company	ABARROTES ECONOMICOS SA	2016	Valorization	50.9	No
Generation company	ABARROTES ECONOMICOS SA	2015	Valorization	50.9	No
Generation company	ABARROTES ECONOMICOS SA	2019	Valorization	51.085	No
Generation company	ABARROTES ECONOMICOS SA	2016	Valorization	51.1	No
Generation company	ABARROTES ECONOMICOS SA	2016	Valorization	51.3	No
Generation company	ABARROTES ECONOMICOS SA	2017	Valorization	51.409	No
Generation company	ABARROTES ECONOMICOS SA	2016	Valorization	51.78	No
Generation company	ABARROTES ECONOMICOS SA	2015	Valorization	51.9	No
Generation company	ABARROTES ECONOMICOS SA	2015	Valorization	51.9	No
Generation company	ABARROTES ECONOMICOS SA	2018	Valorization	51.99	No
Generation company	ABARROTES ECONOMICOS SA	2017	Valorization	52.18	No
Generation company	ABARROTES ECONOMICOS SA	2015	Valorization	52.2	No
Generation company	ABARROTES ECONOMICOS SA	2017	Valorization	52.36	No
Generation company	ABARROTES ECONOMICOS SA	2017	Valorization	52.442	No
Generation company	ABARROTES ECONOMICOS SA	2019	Valorization	52.459	No
Generation company	ABARROTES ECONOMICOS SA	2019	Valorization	52.577	No
Generation company	ABARROTES ECONOMICOS SA	2019	Valorization	52.65	No
Generation company	ABARROTES ECONOMICOS SA	2018	Valorization	52.78	No
Generation company	ABARROTES ECONOMICOS SA	2015	Valorization	52.8	No
Generation company	ABARROTES ECONOMICOS SA	2018	Valorization	53.01	No
Generation company	ABARROTES ECONOMICOS SA	2018	Valorization	53.19	No
Generation company	ABARROTES ECONOMICOS SA	2018	Valorization	53.35	No
Generation company	ABARROTES ECONOMICOS SA	2017	Valorization	53.358	No
Generation company	ABARROTES ECONOMICOS SA	2015	Valorization	53.5	No
Generation company	ABARROTES ECONOMICOS SA	2016	Valorization	53.79	No
Generation company	ABARROTES ECONOMICOS SA	2018	Valorization	53.98	No
Generation company	ABARROTES ECONOMICOS SA	2019	Valorization	54.073	No
Generation company	ABARROTES ECONOMICOS SA	2019	Valorization	54.11	No
Generation company	ABARROTES ECONOMICOS SA	2017	Valorization	54.15	No
Generation company	ABARROTES ECONOMICOS SA	2018	Valorization	54.21	No
Generation company	ABARROTES ECONOMICOS SA	2017	Valorization	54.267	No
Generation company	ABARROTES ECONOMICOS SA	2015	Valorization	54.3	No
Generation company	ABARROTES ECONOMICOS SA	2017	Valorization	54.54	No
Generation company	ABARROTES ECONOMICOS SA	2016	Valorization	55.191	No
Generation company	ABARROTES ECONOMICOS SA	2019	Valorization	55.2	No
Generation company	ABARROTES ECONOMICOS SA	2016	Valorization	55.3	No
Generation company	ABARROTES ECONOMICOS SA	2017	Valorization	55.429	No
Generation company	ABARROTES ECONOMICOS SA	2017	Valorization	55.665	No
Generation company	ABARROTES ECONOMICOS SA	2016	Valorization	55.861	No
Generation company	ABARROTES ECONOMICOS SA	2017	Valorization	55.96	No
Generation company	ABARROTES ECONOMICOS SA	2017	Valorization	56.033	No
Generation company	ABARROTES ECONOMICOS SA	2017	Valorization	56.066	No
Generation company	ABARROTES ECONOMICOS SA	2017	Valorization	56.26	No
Generation company	ABARROTES ECONOMICOS SA	2019	Valorization	56.272	No
Generation company	ABARROTES ECONOMICOS SA	2019	Valorization	56.469	No
Generation company	ABARROTES ECONOMICOS SA	2018	Valorization	56.67	No
Generation company	ABARROTES ECONOMICOS SA	2016	Valorization	56.884	No
Generation company	ABARROTES ECONOMICOS SA	2016	Valorization	57.006	No
Generation company	ABARROTES ECONOMICOS SA	2017	Valorization	57.025	No
Generation company	ABARROTES ECONOMICOS SA	2016	Valorization	57.6	No
Generation company	ABARROTES ECONOMICOS SA	2018	Valorization	57.69	No
Generation company	ABARROTES ECONOMICOS SA	2016	Valorization	57.771	No
Generation company	ABARROTES ECONOMICOS SA	2015	Valorization	57.8	No
Generation company	ABARROTES ECONOMICOS SA	2019	Valorization	58.37	No
Generation company	ABARROTES ECONOMICOS SA	2015	Valorization	58.5	No
Generation company	ABARROTES ECONOMICOS SA	2019	Valorization	58.574	No
Generation company	ABARROTES ECONOMICOS SA	2017	Valorization	58.95	No
Generation company	ABARROTES ECONOMICOS SA	2019	Valorization	59.055	No
Generation company	ABARROTES ECONOMICOS SA	2019	Valorization	59.16	No
Generation company	ABARROTES ECONOMICOS SA	2017	Valorization	59.401	No
Generation company	ABARROTES ECONOMICOS SA	2018	Valorization	59.43	No
Generation company	ABARROTES ECONOMICOS SA	2017	Valorization	59.453	No
Generation company	ABARROTES ECONOMICOS SA	2019	Valorization	59.52	No
Generation company	ABARROTES ECONOMICOS SA	2015	Valorization	59.8	No
Generation company	ABARROTES ECONOMICOS SA	2015	Valorization	59.8	No
Generation company	ABARROTES ECONOMICOS SA	2019	Valorization	59.833	No
Generation company	ABARROTES ECONOMICOS SA	2017	Valorization	59.89	No
Generation company	ABARROTES ECONOMICOS SA	2017	Valorization	60.087	No
Generation company	ABARROTES ECONOMICOS SA	2015	Valorization	60.4	No
Generation company	ABARROTES ECONOMICOS SA	2018	Valorization	60.52	No
Generation company	ABARROTES ECONOMICOS SA	2016	Valorization	60.887	No
Generation company	ABARROTES ECONOMICOS SA	2017	Valorization	60.93	No
Generation company	ABARROTES ECONOMICOS SA	2019	Valorization	61	No
Generation company	ABARROTES ECONOMICOS SA	2015	Valorization	61	No
Generation company	ABARROTES ECONOMICOS SA	2017	Valorization	61.03	No
Generation company	ABARROTES ECONOMICOS SA	2019	Valorization	61.183	No
Generation company	ABARROTES ECONOMICOS SA	2019	Valorization	61.253	No
Generation company	ABARROTES ECONOMICOS SA	2016	Valorization	61.7	No
Generation company	ABARROTES ECONOMICOS SA	2018	Valorization	61.97	No
Generation company	ABARROTES ECONOMICOS SA	2018	Valorization	62.23	No
Generation company	ABARROTES ECONOMICOS SA	2019	Valorization	62.275	No
Generation company	ABARROTES ECONOMICOS SA	2017	Valorization	62.589	No
Generation company	ABARROTES ECONOMICOS SA	2018	Valorization	62.85	No
Generation company	ABARROTES ECONOMICOS SA	2019	Valorization	62.956	No
Generation company	ABARROTES ECONOMICOS SA	2016	Valorization	63	No
Generation company	ABARROTES ECONOMICOS SA	2019	Valorization	63.354	No
Generation company	ABARROTES ECONOMICOS SA	2016	Valorization	63.395	No
Generation company	ABARROTES ECONOMICOS SA	2018	Valorization	63.48	No
Generation company	ABARROTES ECONOMICOS SA	2015	Valorization	63.6	No
Generation company	ABARROTES ECONOMICOS SA	2015	Valorization	63.6	No
Generation company	ABARROTES ECONOMICOS SA	2016	Valorization	63.76	No
Generation company	ABARROTES ECONOMICOS SA	2018	Valorization	63.87	No
Generation company	ABARROTES ECONOMICOS SA	2017	Valorization	64.076	No
Generation company	ABARROTES ECONOMICOS SA	2015	Valorization	64.2	No
Generation company	ABARROTES ECONOMICOS SA	2019	Valorization	64.24	No
Generation company	ABARROTES ECONOMICOS SA	2018	Valorization	64.27	No
Generation company	ABARROTES ECONOMICOS SA	2017	Valorization	64.42	No
Generation company	ABARROTES ECONOMICOS SA	2016	Valorization	64.5	No
Generation company	ABARROTES ECONOMICOS SA	2016	Valorization	64.673	No
Generation company	ABARROTES ECONOMICOS SA	2018	Valorization	64.881	No
Generation company	ABARROTES ECONOMICOS SA	2019	Valorization	64.975	No
Generation company	ABARROTES ECONOMICOS SA	2017	Valorization	64.988	No
Generation company	ABARROTES ECONOMICOS SA	2016	Valorization	65	No
Generation company	ABARROTES ECONOMICOS SA	2018	Valorization	65.09	No
Generation company	ABARROTES ECONOMICOS SA	2015	Valorization	65.3	No
Generation company	ABARROTES ECONOMICOS SA	2016	Valorization	65.402	No
Generation company	ABARROTES ECONOMICOS SA	2018	Valorization	65.44	No
Generation company	ABARROTES ECONOMICOS SA	2016	Valorization	65.6	No
Generation company	ABARROTES ECONOMICOS SA	2019	Valorization	65.61	No
Generation company	ABARROTES ECONOMICOS SA	2015	Valorization	65.8	No
Generation company	ABARROTES ECONOMICOS SA	2019	Valorization	65.93	No
Generation company	ABARROTES ECONOMICOS SA	2019	Valorization	66.226	No
Generation company	ABARROTES ECONOMICOS SA	2016	Valorization	66.3	No
Generation company	ABARROTES ECONOMICOS SA	2016	Valorization	66.44	No
Generation company	ABARROTES ECONOMICOS SA	2015	Valorization	66.6	No
Generation company	ABARROTES ECONOMICOS SA	2016	Valorization	66.6	No
Generation company	ABARROTES ECONOMICOS SA	2018	Valorization	66.81	No
Generation company	ABARROTES ECONOMICOS SA	2017	Valorization	66.87	No
Generation company	ABARROTES ECONOMICOS SA	2015	Valorization	66.9	No
Generation company	ABARROTES ECONOMICOS SA	2019	Valorization	66.91	No
Generation company	ABARROTES ECONOMICOS SA	2017	Valorization	67.055	No
Generation company	ABARROTES ECONOMICOS SA	2016	Valorization	67.186	No
Generation company	ABARROTES ECONOMICOS SA	2019	Valorization	67.487	No
Generation company	ABARROTES ECONOMICOS SA	2017	Valorization	67.525	No
Generation company	ABARROTES ECONOMICOS SA	2015	Valorization	67.7	No
Generation company	ABARROTES ECONOMICOS SA	2018	Valorization	67.74	No
Generation company	ABARROTES ECONOMICOS SA	2018	Valorization	67.8	No
Generation company	ABARROTES ECONOMICOS SA	2019	Valorization	67.885	No
Generation company	ABARROTES ECONOMICOS SA	2016	Valorization	68	No
Generation company	ABARROTES ECONOMICOS SA	2019	Valorization	68.274	No
Generation company	ABARROTES ECONOMICOS SA	2019	Valorization	68.288	No
Generation company	ABARROTES ECONOMICOS SA	2017	Valorization	68.38	No
Generation company	ABARROTES ECONOMICOS SA	2019	Valorization	68.45	No
Generation company	ABARROTES ECONOMICOS SA	2019	Valorization	68.54	No
Generation company	ABARROTES ECONOMICOS SA	2019	Valorization	68.56	No
Generation company	ABARROTES ECONOMICOS SA	2018	Valorization	68.74	No
Generation company	ABARROTES ECONOMICOS SA	2017	Valorization	68.78	No
Generation company	ABARROTES ECONOMICOS SA	2017	Valorization	68.86	No
Generation company	ABARROTES ECONOMICOS SA	2016	Valorization	69	No
Generation company	ABARROTES ECONOMICOS SA	2019	Valorization	69.06	No
Generation company	ABARROTES ECONOMICOS SA	2015	Valorization	69.1	No
Generation company	ABARROTES ECONOMICOS SA	2019	Valorization	69.215	No
Generation company	ABARROTES ECONOMICOS SA	2018	Valorization	69.39	No
Generation company	ABARROTES ECONOMICOS SA	2015	Valorization	69.4	No
Generation company	ABARROTES ECONOMICOS SA	2016	Valorization	69.5	No
Generation company	ABARROTES ECONOMICOS SA	2015	Valorization	69.5	No
Generation company	ABARROTES ECONOMICOS SA	2016	Valorization	69.517	No
Generation company	ABARROTES ECONOMICOS SA	2016	Valorization	69.75	No
Generation company	ABARROTES ECONOMICOS SA	2017	Valorization	69.84	No
Generation company	ABARROTES ECONOMICOS SA	2016	Valorization	69.958	No
Generation company	ABARROTES ECONOMICOS SA	2016	Valorization	70.202	No
Generation company	ABARROTES ECONOMICOS SA	2019	Valorization	70.25	No
Generation company	ABARROTES ECONOMICOS SA	2019	Valorization	70.275	No
Generation company	ABARROTES ECONOMICOS SA	2019	Valorization	70.584	No
Generation company	ABARROTES ECONOMICOS SA	2017	Valorization	70.658	No
Generation company	ABARROTES ECONOMICOS SA	2019	Valorization	70.679	No
Generation company	ABARROTES ECONOMICOS SA	2016	Valorization	70.82	No
Generation company	ABARROTES ECONOMICOS SA	2019	Valorization	70.928	No
Generation company	ABARROTES ECONOMICOS SA	2016	Valorization	70.99	No
Generation company	ABARROTES ECONOMICOS SA	2019	Valorization	70.992	No
Generation company	ABARROTES ECONOMICOS SA	2017	Valorization	71.28	No
Generation company	ABARROTES ECONOMICOS SA	2019	Valorization	71.54	No
Generation company	ABARROTES ECONOMICOS SA	2018	Valorization	71.6	No
Generation company	ABARROTES ECONOMICOS SA	2016	Valorization	72	No
Generation company	ABARROTES ECONOMICOS SA	2017	Valorization	72.204	No
Generation company	ABARROTES ECONOMICOS SA	2019	Valorization	72.362	No
Generation company	ABARROTES ECONOMICOS SA	2019	Valorization	72.524	No
Generation company	ABARROTES ECONOMICOS SA	2017	Valorization	72.745	No
Generation company	ABARROTES ECONOMICOS SA	2016	Valorization	73.09	No
Generation company	ABARROTES ECONOMICOS SA	2016	Valorization	73.1	No
Generation company	ABARROTES ECONOMICOS SA	2017	Valorization	73.252	No
Generation company	ABARROTES ECONOMICOS SA	2019	Valorization	73.718	No
Generation company	ABARROTES ECONOMICOS SA	2015	Valorization	74	No
Generation company	ABARROTES ECONOMICOS SA	2016	Valorization	74.1	No
Generation company	ABARROTES ECONOMICOS SA	2016	Valorization	74.288	No
Generation company	ABARROTES ECONOMICOS SA	2015	Valorization	74.4	No
Generation company	ABARROTES ECONOMICOS SA	2017	Valorization	74.636	No
Generation company	ABARROTES ECONOMICOS SA	2015	Valorization	74.7	No
Generation company	ABARROTES ECONOMICOS SA	2016	Valorization	74.81	No
Generation company	ABARROTES ECONOMICOS SA	2016	Valorization	74.919	No
Generation company	ABARROTES ECONOMICOS SA	2018	Valorization	74.97	No
Generation company	ABARROTES ECONOMICOS SA	2016	Valorization	75.209	No
Generation company	ABARROTES ECONOMICOS SA	2019	Valorization	75.23	No
Generation company	ABARROTES ECONOMICOS SA	2017	Valorization	75.39	No
Generation company	ABARROTES ECONOMICOS SA	2015	Valorization	75.8	No
Generation company	ABARROTES ECONOMICOS SA	2016	Valorization	75.97	No
Generation company	ABARROTES ECONOMICOS SA	2018	Valorization	75.97	No
Generation company	ABARROTES ECONOMICOS SA	2018	Valorization	76	No
Generation company	ABARROTES ECONOMICOS SA	2016	Valorization	76.1	No
Generation company	ABARROTES ECONOMICOS SA	2018	Valorization	76.46	No
Generation company	ABARROTES ECONOMICOS SA	2017	Valorization	76.521	No
Generation company	ABARROTES ECONOMICOS SA	2017	Valorization	76.73	No
Generation company	ABARROTES ECONOMICOS SA	2016	Valorization	76.978	No
Generation company	ABARROTES ECONOMICOS SA	2019	Valorization	77.215	No
Generation company	ABARROTES ECONOMICOS SA	2018	Valorization	77.37	No
Generation company	ABARROTES ECONOMICOS SA	2016	Valorization	77.74	No
Generation company	ABARROTES ECONOMICOS SA	2018	Valorization	78.25	No
Generation company	ABARROTES ECONOMICOS SA	2018	Valorization	78.52	No
Generation company	ABARROTES ECONOMICOS SA	2019	Valorization	78.79	No
Generation company	ABARROTES ECONOMICOS SA	2019	Valorization	78.792	No
Generation company	ABARROTES ECONOMICOS SA	2017	Valorization	78.92	No
Generation company	ABARROTES ECONOMICOS SA	2016	Valorization	79.376	No
Generation company	ABARROTES ECONOMICOS SA	2017	Valorization	79.38	No
Generation company	ABARROTES ECONOMICOS SA	2019	Valorization	79.555	No
Generation company	ABARROTES ECONOMICOS SA	2015	Valorization	79.6	No
Generation company	ABARROTES ECONOMICOS SA	2018	Valorization	79.65	No
Generation company	ABARROTES ECONOMICOS SA	2019	Valorization	79.666	No
Generation company	ABARROTES ECONOMICOS SA	2017	Valorization	79.93	No
Generation company	ABARROTES ECONOMICOS SA	2016	Valorization	79.971	No
Generation company	ABARROTES ECONOMICOS SA	2019	Valorization	80.045	No
Generation company	ABARROTES ECONOMICOS SA	2017	Valorization	80.245	No
Generation company	ABARROTES ECONOMICOS SA	2018	Valorization	80.29	No
Generation company	ABARROTES ECONOMICOS SA	2018	Valorization	80.39	No
Generation company	ABARROTES ECONOMICOS SA	2017	Valorization	80.45	No
Generation company	ABARROTES ECONOMICOS SA	2018	Valorization	80.48	No
Generation company	ABARROTES ECONOMICOS SA	2015	Valorization	80.6	No
Generation company	ABARROTES ECONOMICOS SA	2015	Valorization	80.9	No
Generation company	ABARROTES ECONOMICOS SA	2015	Valorization	81.3	No
Generation company	ABARROTES ECONOMICOS SA	2018	Valorization	81.92	No
Generation company	ABARROTES ECONOMICOS SA	2016	Valorization	82.2	No
Generation company	ABARROTES ECONOMICOS SA	2016	Valorization	82.224	No
Generation company	ABARROTES ECONOMICOS SA	2019	Valorization	82.246	No
Generation company	ABARROTES ECONOMICOS SA	2017	Valorization	82.338	No
Generation company	ABARROTES ECONOMICOS SA	2017	Valorization	82.566	No
Generation company	ABARROTES ECONOMICOS SA	2019	Valorization	82.598	No
Generation company	ABARROTES ECONOMICOS SA	2018	Valorization	82.6	No
Generation company	ABARROTES ECONOMICOS SA	2018	Valorization	82.85	No
Generation company	ABARROTES ECONOMICOS SA	2018	Valorization	83.31	No
Generation company	ABARROTES ECONOMICOS SA	2015	Valorization	83.4	No
Generation company	ABARROTES ECONOMICOS SA	2017	Valorization	83.437	No
Generation company	ABARROTES ECONOMICOS SA	2017	Valorization	83.512	No
Generation company	ABARROTES ECONOMICOS SA	2017	Valorization	83.527	No
Generation company	ABARROTES ECONOMICOS SA	2019	Valorization	83.573	No
Generation company	ABARROTES ECONOMICOS SA	2018	Valorization	83.62	No
Generation company	ABARROTES ECONOMICOS SA	2017	Valorization	83.85	No
Generation company	ABARROTES ECONOMICOS SA	2019	Valorization	83.856	No
Generation company	ABARROTES ECONOMICOS SA	2018	Valorization	84.08	No
Generation company	ABARROTES ECONOMICOS SA	2018	Valorization	84.38	No
Generation company	ABARROTES ECONOMICOS SA	2015	Valorization	84.4	No
Generation company	ABARROTES ECONOMICOS SA	2015	Valorization	84.4	No
Generation company	ABARROTES ECONOMICOS SA	2015	Valorization	84.5	No
Generation company	ABARROTES ECONOMICOS SA	2018	Valorization	84.5	No
Generation company	ABARROTES ECONOMICOS SA	2019	Valorization	84.71	No
Generation company	ABARROTES ECONOMICOS SA	2018	Valorization	84.99	No
Generation company	ABARROTES ECONOMICOS SA	2015	Valorization	85.1	No
Generation company	ABARROTES ECONOMICOS SA	2017	Valorization	85.15	No
Generation company	ABARROTES ECONOMICOS SA	2018	Valorization	85.39	No
Generation company	ABARROTES ECONOMICOS SA	2015	Valorization	86.2	No
Generation company	ABARROTES ECONOMICOS SA	2017	Valorization	86.383	No
Generation company	ABARROTES ECONOMICOS SA	2015	Valorization	86.6	No
Generation company	ABARROTES ECONOMICOS SA	2016	Valorization	86.8	No
Generation company	ABARROTES ECONOMICOS SA	2019	Valorization	87	No
Generation company	ABARROTES ECONOMICOS SA	2017	Valorization	87.07	No
Generation company	ABARROTES ECONOMICOS SA	2019	Valorization	87.26	No
Generation company	ABARROTES ECONOMICOS SA	2018	Valorization	87.811	No
Generation company	ABARROTES ECONOMICOS SA	2015	Valorization	87.9	No
Generation company	ABARROTES ECONOMICOS SA	2018	Valorization	88.41	No
Generation company	ABARROTES ECONOMICOS SA	2019	Valorization	88.75	No
Generation company	ABARROTES ECONOMICOS SA	2018	Valorization	88.77	No
Generation company	ABARROTES ECONOMICOS SA	2019	Valorization	88.78	No
Generation company	ABARROTES ECONOMICOS SA	2015	Valorization	89	No
Generation company	ABARROTES ECONOMICOS SA	2019	Valorization	89.05	No
Generation company	ABARROTES ECONOMICOS SA	2018	Valorization	89.28	No
Generation company	ABARROTES ECONOMICOS SA	2016	Valorization	89.3	No
Generation company	ABARROTES ECONOMICOS SA	2018	Valorization	89.37	No
Generation company	ABARROTES ECONOMICOS SA	2016	Valorization	89.7	No
Generation company	ABARROTES ECONOMICOS SA	2016	Valorization	90.7	No
Generation company	ABARROTES ECONOMICOS SA	2019	Valorization	90.749	No
Generation company	ABARROTES ECONOMICOS SA	2017	Valorization	91.047	No
Generation company	ABARROTES ECONOMICOS SA	2017	Valorization	91.348	No
Generation company	ABARROTES ECONOMICOS SA	2019	Valorization	91.645	No
Generation company	ABARROTES ECONOMICOS SA	2018	Valorization	91.82	No
Generation company	ABARROTES ECONOMICOS SA	2019	Valorization	91.89	No
Generation company	ABARROTES ECONOMICOS SA	2019	Valorization	92.194	No
Generation company	ABARROTES ECONOMICOS SA	2019	Valorization	92.636	No
Generation company	ABARROTES ECONOMICOS SA	2016	Valorization	92.698	No
Generation company	ABARROTES ECONOMICOS SA	2015	Valorization	93.4	No
Generation company	ABARROTES ECONOMICOS SA	2017	Valorization	93.506	No
Generation company	ABARROTES ECONOMICOS SA	2015	Valorization	94	No
Generation company	ABARROTES ECONOMICOS SA	2015	Valorization	94	No
Generation company	ABARROTES ECONOMICOS SA	2015	Valorization	94.4	No
Generation company	ABARROTES ECONOMICOS SA	2019	Valorization	94.537	No
Generation company	ABARROTES ECONOMICOS SA	2019	Valorization	94.716	No
Generation company	ABARROTES ECONOMICOS SA	2016	Valorization	94.882	No
Generation company	ABARROTES ECONOMICOS SA	2018	Valorization	95.29	No
Generation company	ABARROTES ECONOMICOS SA	2017	Valorization	95.466	No
Generation company	ABARROTES ECONOMICOS SA	2016	Valorization	95.5	No
Generation company	ABARROTES ECONOMICOS SA	2015	Valorization	95.6	No
Generation company	ABARROTES ECONOMICOS SA	2015	Valorization	96.1	No
Generation company	ABARROTES ECONOMICOS SA	2019	Valorization	97.04	No
Generation company	ABARROTES ECONOMICOS SA	2019	Valorization	97.049	No
Generation company	ABARROTES ECONOMICOS SA	2017	Valorization	97.361	No
Generation company	ABARROTES ECONOMICOS SA	2019	Valorization	97.427	No
Generation company	ABARROTES ECONOMICOS SA	2016	Valorization	98.3	No
Generation company	ABARROTES ECONOMICOS SA	2016	Valorization	98.449	No
Generation company	ABARROTES ECONOMICOS SA	2016	Valorization	98.6	No
Generation company	ABARROTES ECONOMICOS SA	2019	Valorization	98.77	No
Generation company	ABARROTES ECONOMICOS SA	2019	Valorization	99.228	No
Generation company	ABARROTES ECONOMICOS SA	2016	Valorization	99.632	No
Generation company	ABARROTES ECONOMICOS SA	2017	Valorization	99.76	No
Generation company	ABARROTES ECONOMICOS SA	2016	Valorization	100.043	No
Generation company	ABARROTES ECONOMICOS SA	2018	Valorization	100.11	No
Generation company	ABARROTES ECONOMICOS SA	2019	Valorization	100.551	No
Generation company	ABARROTES ECONOMICOS SA	2018	Valorization	100.62	No
Generation company	ABARROTES ECONOMICOS SA	2016	Valorization	100.923	No
Generation company	ABARROTES ECONOMICOS SA	2018	Valorization	101.53	No
Generation company	ABARROTES ECONOMICOS SA	2015	Valorization	102	No
Generation company	ABARROTES ECONOMICOS SA	2015	Valorization	102	No
Generation company	ABARROTES ECONOMICOS SA	2017	Valorization	102.783	No
Generation company	ABARROTES ECONOMICOS SA	2015	Valorization	103.2	No
Generation company	ABARROTES ECONOMICOS SA	2015	Valorization	103.2	No
Generation company	ABARROTES ECONOMICOS SA	2017	Valorization	103.544	No
Generation company	ABARROTES ECONOMICOS SA	2015	Valorization	103.7	No
Generation company	ABARROTES ECONOMICOS SA	2018	Valorization	103.95	No
Generation company	ABARROTES ECONOMICOS SA	2019	Valorization	105.18	No
Generation company	ABARROTES ECONOMICOS SA	2018	Valorization	105.27	No
Generation company	ABARROTES ECONOMICOS SA	2015	Valorization	106	No
Generation company	ABARROTES ECONOMICOS SA	2017	Valorization	107.54	No
Generation company	ABARROTES ECONOMICOS SA	2016	Valorization	108.3	No
Generation company	ABARROTES ECONOMICOS SA	2015	Valorization	108.4	No
Generation company	ABARROTES ECONOMICOS SA	2019	Valorization	109.18	No
Generation company	ABARROTES ECONOMICOS SA	2017	Valorization	109.19	No
Generation company	ABARROTES ECONOMICOS SA	2017	Valorization	109.87	No
Generation company	ABARROTES ECONOMICOS SA	2018	Valorization	110.14	No
Generation company	ABARROTES ECONOMICOS SA	2015	Valorization	110.5	No
Generation company	ABARROTES ECONOMICOS SA	2014	Valorization	111	No
Generation company	ABARROTES ECONOMICOS SA	2018	Valorization	111.22	No
Generation company	ABARROTES ECONOMICOS SA	2015	Valorization	111.3	No
Generation company	ABARROTES ECONOMICOS SA	2017	Valorization	112.281	No
Generation company	ABARROTES ECONOMICOS SA	2017	Valorization	112.614	No
Generation company	ABARROTES ECONOMICOS SA	2016	Valorization	113.007	No
Generation company	ABARROTES ECONOMICOS SA	2018	Valorization	116.47	No
Generation company	ABARROTES ECONOMICOS SA	2018	Valorization	117.99	No
Generation company	ABARROTES ECONOMICOS SA	2018	Valorization	118.83	No
Generation company	ABARROTES ECONOMICOS SA	2016	Valorization	119.678	No
Generation company	ABARROTES ECONOMICOS SA	2015	Valorization	122	No
Generation company	ABARROTES ECONOMICOS SA	2015	Valorization	127.1	No
Generation company	ABARROTES ECONOMICOS SA	2018	Valorization	128.16	No
Generation company	ABARROTES ECONOMICOS SA	2019	Valorization	131.92	No
Generation company	ABARROTES ECONOMICOS SA	2016	Valorization	135.19	No
Generation company	ABARROTES ECONOMICOS SA	2017	Valorization	135.265	No
Generation company	ABARROTES ECONOMICOS SA	2017	Valorization	137.139	No
Generation company	ABARROTES ECONOMICOS SA	2018	Valorization	140.36	No
Generation company	ABARROTES ECONOMICOS SA	2015	Valorization	140.4	No
Generation company	ABARROTES ECONOMICOS SA	2015	Valorization	140.8	No
Generation company	ABARROTES ECONOMICOS SA	2015	Valorization	141	No
Generation company	ABARROTES ECONOMICOS SA	2016	Valorization	145	No
Generation company	ABARROTES ECONOMICOS SA	2018	Valorization	152.13	No
Generation company	ABARROTES ECONOMICOS SA	2015	Valorization	152.3	No
Generation company	ABARROTES ECONOMICOS SA	2018	Valorization	156.98	No
Generation company	ABARROTES ECONOMICOS SA	2019	Valorization	158.482	No
Generation company	ABARROTES ECONOMICOS SA	2019	Valorization	159.963	No
Generation company	ABARROTES ECONOMICOS SA	2014	Valorization	160	No
Generation company	ABARROTES ECONOMICOS SA	2015	Valorization	162.2	No
Generation company	ABARROTES ECONOMICOS SA	2015	Valorization	164.9	No
Generation company	ABARROTES ECONOMICOS SA	2018	Valorization	167.84	No
Generation company	ABARROTES ECONOMICOS SA	2018	Valorization	179.05	No
Generation company	ABARROTES ECONOMICOS SA	2015	Valorization	193.1	No
Generation company	ABARROTES ECONOMICOS SA	2018	Valorization	208.94	No
Generation company	ABASTECEDORA DE COMERCIO LTDA	2017	Elimination	0.9	No
Generation company	ABASTECEDORA DE COMERCIO LTDA	2014	Elimination	1	No
Generation company	ABASTECEDORA DE COMERCIO LTDA	2015	Elimination	1.87	No
Generation company	ABASTECEDORA DE COMERCIO LTDA	2016	Elimination	10.44	No
Generation company	ABASTECEDORA DE COMERCIO LTDA	2014	Elimination	33.9	No
Generation company	Abastecedora de Cristales VM Glass S.A.	2016	Valorization	19.56	No
Generation company	Abastecedora general insumos el alto	2017	Valorization	11.94	No
Generation company	ABASTIBLE S.A.	2018	Elimination	0.18	Yes
Generation company	ABASTIBLE S.A.	2018	Elimination	0.68	Yes
Generation company	ABASTIBLE S.A.	2018	Elimination	0.77	Yes
Generation company	ABASTIBLE S.A.	2018	Elimination	0.84	Yes
Generation company	ABASTIBLE S.A.	2018	Elimination	0.88	Yes
Generation company	ABASTIBLE S.A.	2018	Elimination	0.91	Yes
Generation company	ABASTIBLE S.A.	2018	Elimination	0.92	Yes
Generation company	ABASTIBLE S.A.	2018	Elimination	0.92	Yes
Generation company	ABASTIBLE S.A.	2018	Elimination	0.96	Yes
Generation company	ABASTIBLE S.A.	2018	Elimination	0.99	Yes
Generation company	ABASTIBLE S.A.	2018	Elimination	1.03	Yes
Generation company	ABASTIBLE S.A.	2018	Elimination	1.03	Yes
Generation company	ABASTIBLE S.A.	2018	Elimination	1.03	Yes
Generation company	ABASTIBLE S.A.	2018	Elimination	1.05	Yes
Generation company	ABASTIBLE S.A.	2018	Elimination	1.06	Yes
Generation company	ABASTIBLE S.A.	2018	Elimination	1.07	Yes
Generation company	ABASTIBLE S.A.	2018	Elimination	1.09	Yes
Generation company	ABASTIBLE S.A.	2018	Elimination	1.16	Yes
Generation company	ABASTIBLE S.A.	2018	Elimination	1.16	Yes
Generation company	ABASTIBLE S.A.	2018	Elimination	1.16	Yes
Generation company	ABASTIBLE S.A.	2018	Elimination	1.23	Yes
Generation company	ABASTIBLE S.A.	2018	Elimination	1.28	Yes
Generation company	ABASTIBLE S.A.	2018	Elimination	1.35	Yes
Generation company	ABASTIBLE S.A.	2018	Elimination	1.36	Yes
Generation company	ABASTIBLE S.A.	2018	Elimination	1.38	Yes
Generation company	ABASTIBLE S.A.	2018	Elimination	1.43	Yes
Generation company	ABASTIBLE S.A.	2018	Elimination	1.44	Yes
Generation company	ABASTIBLE S.A.	2018	Elimination	1.44	Yes
Generation company	ABASTIBLE S.A.	2018	Elimination	1.45	Yes
Generation company	ABASTIBLE S.A.	2018	Elimination	1.46	Yes
Generation company	ABASTIBLE S.A.	2018	Elimination	1.48	Yes
Generation company	ABASTIBLE S.A.	2018	Elimination	1.5	Yes
Generation company	ABASTIBLE S.A.	2018	Elimination	1.52	Yes
Generation company	ABASTIBLE S.A.	2018	Elimination	1.52	Yes
Generation company	ABASTIBLE S.A.	2018	Elimination	1.53	Yes
Generation company	ABASTIBLE S.A.	2018	Elimination	1.54	Yes
Generation company	ABASTIBLE S.A.	2018	Elimination	1.55	Yes
Generation company	ABASTIBLE S.A.	2018	Elimination	1.57	Yes
Generation company	ABASTIBLE S.A.	2018	Elimination	1.59	Yes
Generation company	ABASTIBLE S.A.	2018	Elimination	1.62	Yes
Generation company	ABASTIBLE S.A.	2018	Elimination	1.65	Yes
Generation company	ABASTIBLE S.A.	2018	Elimination	1.65	Yes
Generation company	ABASTIBLE S.A.	2018	Elimination	1.71	Yes
Generation company	ABASTIBLE S.A.	2018	Elimination	1.74	Yes
Generation company	ABASTIBLE S.A.	2018	Elimination	1.76	Yes
Generation company	ABASTIBLE S.A.	2018	Elimination	1.8	Yes
Generation company	ABASTIBLE S.A.	2018	Elimination	1.8	Yes
Generation company	ABASTIBLE S.A.	2018	Elimination	1.8	Yes
Generation company	ABASTIBLE S.A.	2018	Elimination	1.83	Yes
Generation company	ABASTIBLE S.A.	2018	Elimination	1.84	Yes
Generation company	ABASTIBLE S.A.	2018	Elimination	1.88	Yes
Generation company	ABASTIBLE S.A.	2018	Elimination	1.88	Yes
Generation company	ABASTIBLE S.A.	2018	Elimination	1.91	Yes
Generation company	ABASTIBLE S.A.	2018	Elimination	1.92	Yes
Generation company	ABASTIBLE S.A.	2018	Elimination	1.94	Yes
Generation company	ABASTIBLE S.A.	2018	Elimination	1.96	Yes
Generation company	ABASTIBLE S.A.	2018	Elimination	1.99	Yes
Generation company	ABASTIBLE S.A.	2018	Elimination	2.05	Yes
Generation company	ABASTIBLE S.A.	2018	Elimination	2.07	Yes
Generation company	ABASTIBLE S.A.	2018	Elimination	2.15	Yes
Generation company	ABASTIBLE S.A.	2018	Elimination	2.15	Yes
Generation company	ABASTIBLE S.A.	2018	Elimination	2.25	Yes
Generation company	ABASTIBLE S.A.	2018	Elimination	2.27	Yes
Generation company	ABASTIBLE S.A.	2018	Elimination	2.31	Yes
Generation company	ABASTIBLE S.A.	2018	Elimination	2.34	Yes
Generation company	ABASTIBLE S.A.	2018	Elimination	2.35	Yes
Generation company	ABASTIBLE S.A.	2018	Elimination	2.35	Yes
Generation company	ABASTIBLE S.A.	2019	Elimination	2.36	Yes
Generation company	ABASTIBLE S.A.	2019	Elimination	50.65	Yes
Generation company	ABASTIBLE S.A.	2017	Elimination	53.91	Yes
Generation company	ABASTIBLE S.A.	2018	Elimination	59.35	Yes
Generation company	ABASTIBLE S.A.	2018	Valorization	0.2	Yes
Generation company	Abastible S.A.	2019	Valorization	0.2	Yes
Generation company	Abastible S.A.	2019	Valorization	0.22	Yes
Generation company	ABASTIBLE S.A.	2018	Valorization	0.24	Yes
Generation company	ABASTIBLE S.A.	2018	Valorization	0.24	Yes
Generation company	ABASTIBLE S.A.	2015	Valorization	0.26	Yes
Generation company	ABASTIBLE S.A.	2018	Valorization	0.28	Yes
Generation company	ABASTIBLE S.A.	2018	Valorization	0.35	Yes
Generation company	ABASTIBLE S.A.	2018	Valorization	0.42	Yes
Generation company	ABASTIBLE S.A.	2018	Valorization	0.43	Yes
Generation company	ABASTIBLE S.A.	2018	Valorization	0.46	Yes
Generation company	ABASTIBLE S.A.	2018	Valorization	0.49	Yes
Generation company	ABASTIBLE S.A.	2018	Valorization	0.49	Yes
Generation company	ABASTIBLE S.A.	2018	Valorization	0.5	Yes
Generation company	ABASTIBLE S.A.	2018	Valorization	0.51	Yes
Generation company	ABASTIBLE S.A.	2018	Valorization	0.53	Yes
Generation company	ABASTIBLE S.A.	2018	Valorization	0.54	Yes
Generation company	ABASTIBLE S.A.	2018	Valorization	0.57	Yes
Generation company	ABASTIBLE S.A.	2018	Valorization	0.58	Yes
Generation company	ABASTIBLE S.A.	2018	Valorization	0.59	Yes
Generation company	ABASTIBLE S.A.	2018	Valorization	0.59	Yes
Generation company	ABASTIBLE S.A.	2018	Valorization	0.59	Yes
Generation company	ABASTIBLE S.A.	2018	Valorization	0.59	Yes
Generation company	ABASTIBLE S.A.	2018	Valorization	0.6	Yes
Generation company	ABASTIBLE S.A.	2018	Valorization	0.61	Yes
Generation company	ABASTIBLE S.A.	2018	Valorization	0.62	Yes
Generation company	ABASTIBLE S.A.	2018	Valorization	0.64	Yes
Generation company	ABASTIBLE S.A.	2018	Valorization	0.71	Yes
Generation company	ABASTIBLE S.A.	2014	Valorization	0.75	Yes
Generation company	ABASTIBLE S.A.	2018	Valorization	0.79	Yes
Generation company	ABASTIBLE S.A.	2018	Valorization	0.85	Yes
Generation company	ABASTIBLE S.A.	2018	Valorization	0.94	Yes
Generation company	ABASTIBLE S.A.	2018	Valorization	0.94	Yes
Generation company	ABASTIBLE S.A.	2018	Valorization	0.95	Yes
Generation company	ABASTIBLE S.A.	2018	Valorization	0.96	Yes
Generation company	ABASTIBLE S.A.	2018	Valorization	1.03	Yes
Generation company	ABASTIBLE S.A.	2018	Valorization	1.04	Yes
Generation company	ABASTIBLE S.A.	2018	Valorization	1.04	Yes
Generation company	ABASTIBLE S.A.	2018	Valorization	1.06	Yes
Generation company	ABASTIBLE S.A.	2018	Valorization	1.07	Yes
Generation company	ABASTIBLE S.A.	2018	Valorization	1.07	Yes
Generation company	ABASTIBLE S.A.	2018	Valorization	1.08	Yes
Generation company	ABASTIBLE S.A.	2018	Valorization	1.08	Yes
Generation company	ABASTIBLE S.A.	2018	Valorization	1.09	Yes
Generation company	ABASTIBLE S.A.	2018	Valorization	1.09	Yes
Generation company	ABASTIBLE S.A.	2018	Valorization	1.1	Yes
Generation company	ABASTIBLE S.A.	2018	Valorization	1.1	Yes
Generation company	ABASTIBLE S.A.	2018	Valorization	1.1	Yes
Generation company	ABASTIBLE S.A.	2018	Valorization	1.11	Yes
Generation company	ABASTIBLE S.A.	2018	Valorization	1.11	Yes
Generation company	ABASTIBLE S.A.	2018	Valorization	1.11	Yes
Generation company	ABASTIBLE S.A.	2018	Valorization	1.12	Yes
Generation company	ABASTIBLE S.A.	2018	Valorization	1.12	Yes
Generation company	ABASTIBLE S.A.	2018	Valorization	1.12	Yes
Generation company	ABASTIBLE S.A.	2018	Valorization	1.12	Yes
Generation company	ABASTIBLE S.A.	2018	Valorization	1.12	Yes
Generation company	ABASTIBLE S.A.	2018	Valorization	1.13	Yes
Generation company	ABASTIBLE S.A.	2018	Valorization	1.13	Yes
Generation company	ABASTIBLE S.A.	2018	Valorization	1.13	Yes
Generation company	ABASTIBLE S.A.	2018	Valorization	1.13	Yes
Generation company	ABASTIBLE S.A.	2018	Valorization	1.13	Yes
Generation company	ABASTIBLE S.A.	2018	Valorization	1.14	Yes
Generation company	ABASTIBLE S.A.	2018	Valorization	1.14	Yes
Generation company	ABASTIBLE S.A.	2018	Valorization	1.15	Yes
Generation company	ABASTIBLE S.A.	2018	Valorization	1.16	Yes
Generation company	ABASTIBLE S.A.	2018	Valorization	1.16	Yes
Generation company	ABASTIBLE S.A.	2018	Valorization	1.18	Yes
Generation company	ABASTIBLE S.A.	2018	Valorization	1.18	Yes
Generation company	ABASTIBLE S.A.	2018	Valorization	1.19	Yes
Generation company	ABASTIBLE S.A.	2018	Valorization	1.19	Yes
Generation company	ABASTIBLE S.A.	2018	Valorization	1.19	Yes
Generation company	ABASTIBLE S.A.	2018	Valorization	1.2	Yes
Generation company	ABASTIBLE S.A.	2018	Valorization	1.21	Yes
Generation company	ABASTIBLE S.A.	2018	Valorization	1.23	Yes
Generation company	ABASTIBLE S.A.	2016	Valorization	1.8	Yes
Generation company	ABASTIBLE S.A.	2019	Valorization	2.34	Yes
Generation company	ABASTIBLE S.A.	2018	Valorization	2.91	Yes
Generation company	ABASTIBLE S.A.	2018	Valorization	3.26	Yes
Generation company	ABASTIBLE S.A.	2017	Valorization	4	Yes
Generation company	ABASTIBLE S.A.	2016	Valorization	6.69	Yes
Generation company	ABASTIBLE S.A.	2016	Valorization	6.95	Yes
Generation company	ABASTIBLE S.A.	2016	Valorization	7.02	Yes
Generation company	ABASTIBLE S.A.	2016	Valorization	7.18	Yes
Generation company	ABASTIBLE S.A.	2016	Valorization	7.21	Yes
Generation company	ABASTIBLE S.A.	2016	Valorization	7.31	Yes
Generation company	ABASTIBLE S.A.	2016	Valorization	7.39	Yes
Generation company	ABASTIBLE S.A.	2016	Valorization	7.47	Yes
Generation company	ABASTIBLE S.A.	2016	Valorization	7.48	Yes
Generation company	ABASTIBLE S.A.	2016	Valorization	7.5	Yes
Generation company	ABASTIBLE S.A.	2016	Valorization	7.54	Yes
Generation company	ABASTIBLE S.A.	2016	Valorization	7.93	Yes
Generation company	ABASTIBLE S.A.	2016	Valorization	8.12	Yes
Generation company	ABASTIBLE S.A.	2016	Valorization	8.59	Yes
Generation company	ABASTIBLE S.A.	2016	Valorization	14.5	Yes
Generation company	ABASTIBLE S.A.	2018	Valorization	27.76	Yes
Generation company	ABASTIBLE S.A.	2019	Valorization	47.67	Yes
Generation company	ABASTIBLE S.A.	2015	Valorization	58	Yes
Generation company	ABASTIBLE S.A.	2017	Valorization	79.4	Yes
Generation company	ABASTIBLE S.A.	2016	Valorization	172.3	Yes
Generation company	ABASTIBLE S.A.	2018	Valorization	245	Yes
Generation company	ABASTIBLE S.A.	2016	Valorization	247.98	Yes
Generation company	ABASTIBLE S.A.	2015	Valorization	330	Yes
Generation company	ABASTIBLE S.A.	2019	Valorization	436.68	Yes
Generation company	ABASTIBLE S.A.	2017	Valorization	447.08	Yes
Generation company	ABASTIBLE S.A.	2014	Valorization	462	Yes
Generation company	ABASTIBLE S.A.	2018	Valorization	537	Yes
Generation company	ABASTIBLE S.A.	2018	Valorization	537	Yes
Generation company	ABB S.A.	2018	Elimination	0.44	No
Generation company	ABB S.A.	2017	Valorization	0.4	No
Generation company	ABB S.A.	2017	Valorization	0.56	No
Generation company	ABB S.A.	2018	Valorization	0.78	No
Generation company	ABB S.A.	2015	Valorization	1.29	No
Generation company	ABB S.A.	2017	Valorization	3.31	No
Generation company	ABB S.A.	2018	Valorization	13.58	No
Generation company	ABB S.A.	2017	Valorization	45.75	No
Generation company	ABB S.A.	2019	Valorization	59.16	No
Generation company	ABBOTT LABORATORIES DE CHILE LTDA	2017	Elimination	4.08	No
Generation company	ABBOTT LABORATORIES DE CHILE LTDA	2019	Valorization	0.06	No
Generation company	ABBOTT LABORATORIES DE CHILE LTDA	2019	Valorization	0.14	No
Generation company	ABBOTT LABORATORIES DE CHILE LTDA	2019	Valorization	0.17	No
Generation company	ABBOTT LABORATORIES DE CHILE LTDA	2019	Valorization	0.51	No
Generation company	ABBOTT LABORATORIES DE CHILE LTDA	2019	Valorization	0.53	No
Generation company	ABBOTT LABORATORIES DE CHILE LTDA	2018	Valorization	0.7	No
Generation company	ABBOTT LABORATORIES DE CHILE LTDA	2019	Valorization	0.72	No
Generation company	ABBOTT LABORATORIES DE CHILE LTDA	2019	Valorization	1.09	No
Generation company	ABBOTT LABORATORIES DE CHILE LTDA	2017	Valorization	1.24	No
Generation company	ABBOTT LABORATORIES DE CHILE LTDA	2018	Valorization	2.18	No
Generation company	ABBOTT LABORATORIES DE CHILE LTDA	2019	Valorization	3.11	No
Generation company	ABBOTT LABORATORIES DE CHILE LTDA	2017	Valorization	9.19	No
Generation company	ABBOTT LABORATORIES DE CHILE LTDA	2016	Valorization	15.43	No
Generation company	ABBOTT LABORATORIES DE CHILE LTDA	2015	Valorization	17.114	No
Generation company	ABBOTT LABORATORIES DE CHILE LTDA	2017	Valorization	17.98	No
Generation company	ABBOTT LABORATORIES DE CHILE LTDA	2019	Valorization	22.92	No
Generation company	ABBOTT LABORATORIES DE CHILE LTDA	2019	Valorization	36.62	No
Generation company	ABBOTT LABORATORIES DE CHILE LTDA	2019	Valorization	68.05	No
Generation company	ABBUA FLORES SPA	2014	Elimination	8.5	No
Generation company	Abdel Karim Jalil Sukni	2015	Valorization	1360	No
Generation company	ABDON MURILLO ESCOBAR	2017	Valorization	14.71	No
Generation company	ABDON MURILLO ESCOBAR	2016	Valorization	17.76	No
Generation company	ABEL ESTEBAN CEA CASTILLO	2019	Valorization	33.02	No
Generation company	ABEL ESTEBAN CEA CASTILLO	2019	Valorization	119.08	No
Generation company	ABEL ESTEBAN CEA CASTILLO	2018	Valorization	135	No
Generation company	ABEL IGNACIO MEDINA GONZALEZ	2016	Valorization	23.52	No
Generation company	ABELARDO ESPINOZA MORALES	2015	Valorization	72.52	No
Generation company	ABELARDO ESPINOZA MORALES	2014	Valorization	74.42	No
Generation company	ABELARDO ESPINOZA MORALES	2016	Valorization	96.56	No
Generation company	ABELARDO LOPEZ	2016	Valorization	1.4	No
Generation company	ABENGOA CHILE S.A.	2019	Elimination	3.15	No
Generation company	ABENGOA CHILE S.A.	2019	Elimination	5.7	No
Generation company	ABENGOA CHILE S.A.	2017	Elimination	12.53	No
Generation company	ABENGOA CHILE S.A.	2018	Elimination	13.33	No
Generation company	ABENGOA CHILE S.A.	2019	Elimination	366.38	No
Generation company	ABENGOA CHILE S.A.	2017	Valorization	0.21	No
Generation company	ABENGOA CHILE S.A.	2018	Valorization	0.22	No
Generation company	ABENGOA CHILE S.A.	2014	Valorization	55.93	No
Generation company	ABICK S.A.	2015	Elimination	58.4	No
Generation company	ABICK S.A.	2015	Elimination	131.12	No
Generation company	ABICK S.A.	2018	Elimination	143.6	No
Generation company	ABICK S.A.	2017	Elimination	197.1	No
Generation company	ABICK S.A.	2019	Elimination	260.8	No
Generation company	ABICK S.A.	2017	Elimination	741.4	No
Generation company	ABICK S.A.	2019	Elimination	787.3	No
Generation company	ABICK S.A.	2018	Elimination	1144.35	No
Generation company	Abick S.A.	2017	Valorization	24.07	No
Generation company	Abick S.A.	2017	Valorization	285.32	No
Generation company	Abick S.A.	2017	Valorization	897.08	No
Generation company	ABIRE SPA	2019	Valorization	0.1	No
Generation company	ABP SPA	2017	Elimination	2.51	No
Generation company	ABP SPA	2017	Elimination	2.6	No
Generation company	ABP SPA	2017	Elimination	8.67	No
Generation company	ABRAHAM ESPINOZA FAUNDEZ	2019	Valorization	7.02	No
Generation company	ABRAHAM ESPINOZA FAUNDEZ	2019	Valorization	13.74	No
Generation company	Abraham Espinoza Faundez	2019	Valorization	14.7	No
Generation company	ABRAHAM ZEDAN E HIJOS LTDA.	2014	Valorization	7.34	No
Generation company	ABRAHAM ZEDAN E HIJOS LTDA.	2015	Valorization	10.47	No
Generation company	ABRAHAM ZEDAN E HIJOS LTDA.	2018	Valorization	332.56	No
Generation company	ABUPLAST SPA | ABUPLAST SPA	2019	Valorization	7.53	No
Generation company	ABUPLAST SPA | ABUPLAST SPA	2019	Valorization	24.99	No
Generation company	ABUPLAST SPA | ABUPLAST SPA	2019	Valorization	32.03	No
Generation company	ABUPLAST SPA | ABUPLAST SPA	2019	Valorization	82.61	No
Generation company	AC REDES SERVICIOS ACUICOLAS LIMITADA	2016	Elimination	10	No
Generation company	AC REDES SERVICIOS ACUICOLAS LIMITADA	2015	Elimination	26	No
Generation company	AC REDES SERVICIOS ACUICOLAS LIMITADA	2019	Elimination	30	No
Generation company	AC REDES SERVICIOS ACUICOLAS LIMITADA	2017	Elimination	40	No
Generation company	AC REDES SERVICIOS ACUICOLAS LIMITADA	2019	Elimination	78.81	No
Generation company	AC REDES SERVICIOS ACUICOLAS LIMITADA	2019	Elimination	92.4	No
Generation company	AC REDES SERVICIOS ACUICOLAS LIMITADA	2019	Elimination	178.5	No
Generation company	AC REDES SERVICIOS ACUICOLAS LIMITADA	2019	Elimination	217.5	No
Generation company	AC REDES SERVICIOS ACUICOLAS LIMITADA	2014	Elimination	222.5	No
Generation company	AC REDES SERVICIOS ACUICOLAS LIMITADA	2018	Elimination	258.6	No
Generation company	AC REDES SERVICIOS ACUICOLAS LIMITADA	2019	Elimination	275	No
Generation company	AC REDES SERVICIOS ACUICOLAS LIMITADA	2016	Elimination	286.8	No
Generation company	AC REDES SERVICIOS ACUICOLAS LIMITADA	2017	Elimination	321.3	No
Generation company	AC REDES SERVICIOS ACUICOLAS LIMITADA	2014	Elimination	746.46	No
Generation company	AC REDES SERVICIOS ACUICOLAS LIMITADA	2017	Elimination	894	No
Generation company	AC REDES SERVICIOS ACUICOLAS LIMITADA	2018	Elimination	1037	No
Generation company	AC REDES SERVICIOS ACUICOLAS LIMITADA	2015	Elimination	1124	No
Generation company	AC REDES SERVICIOS ACUICOLAS LIMITADA	2015	Elimination	1787	No
Generation company	AC REDES SERVICIOS ACUICOLAS LIMITADA	2016	Elimination	1802	No
Generation company	AC REDES SERVICIOS ACUICOLAS LIMITADA	2018	Elimination	1908.54	No
Generation company	AC REDES SERVICIOS ACUICOLAS LIMITADA	2015	Elimination	2208	No
Generation company	AC REDES SERVICIOS ACUICOLAS LIMITADA	2017	Elimination	2368.08	No
Generation company	AC REDES SERVICIOS ACUICOLAS LIMITADA	2016	Elimination	3364.99	No
Generation company	AC REDES SERVICIOS ACUICOLAS LIMITADA	2014	Elimination	5028	No
Generation company	AC REDES SERVICIOS ACUICOLAS LIMITADA	2016	Valorization	0.01	No
Generation company	AC REDES SERVICIOS ACUICOLAS LIMITADA	2016	Valorization	0.09	No
Generation company	AC REDES SERVICIOS ACUICOLAS LIMITADA	2019	Valorization	36.59	No
Generation company	ACADEMIA POLITECNICA NAVAL	2017	Elimination	19.12	No
Generation company	ACADEMIA POLITECNICA NAVAL	2016	Elimination	48	No
Generation company	ACADEMIA POLITECNICA NAVAL	2018	Elimination	389.73	No
Generation company	ACADEMIA POLITECNICA NAVAL	2019	Elimination	833.7	No
Generation company	ACADEMIA POLITECNICA NAVAL	2015	Elimination	1317	No
Generation company	ACADEMIA POLITECNICA NAVAL	2014	Elimination	3119	No
Generation company	ACADEMIA POLITECNICA NAVAL	2016	Elimination	5027.4	No
Generation company	ACANTO SERVICIOS S.A.	2015	Valorization	0.8	No
Generation company	ACCION AUSTRAL SPA	2019	Elimination	55.8	No
Generation company	ACCION AUSTRAL SPA	2019	Valorization	19.81	No
Generation company	ACCIONA CONSTRUCCION S.A.	2019	Elimination	315.43	No
Generation company	ACCIONA CONSTRUCCION S.A.	2019	Elimination	3968.66	No
Generation company	ACCIONA CONSTRUCCION S.A.	2018	Valorization	0.3	No
Generation company	ACCIONA CONSTRUCCION S.A.	2019	Valorization	0.58	No
Generation company	ACCIONA CONSTRUCCION S.A.	2018	Valorization	1	No
Generation company	ACCIONA CONSTRUCCION S.A.	2019	Valorization	3.22	No
Generation company	ACCIONA CONSTRUCCION S.A.	2019	Valorization	3.3	No
[truncated: 198,000+ more rows]

## Sheet: DataEnterprise
Enterprise	References
ABASTIBLE S.A.	ALVARO ROBERTO LIZANA MATEO, Packaging Sales Manager Abastible, contributes to Gonzalo Blumel (https://www.escuelasol.cl/cl_luzit_herramientas/static/adjuntos/6755/GGEFE_F.pdf and "ELECCIONES DEFINITIVAS CONVENCIONALES CONSTITUYENTES, GOBERNADORES REGIONALES Y MUNICIPALES" Servel (https://www.servel.cl/resultados-definitivos-elecciones-de-convencionales-constituyentes-gobernadores-regionales-alca…
ADMINISTRADORA DE SUPERMERCADOS EXPRESS LIMITADA	LUCY ANA AVILES HERNANDEZ, Walmart's main shareholder family, contributes to Bernardo Fontaine Talavera and Marcela Cubillos (https://www.escuelasol.cl/cl_luzit_herramientas/static/adjuntos/6755/GGEFE_F.pdf and "ELECCIONES DEFINITIVAS CONVENCIONALES CONSTITUYENTES, GOBERNADORES REGIONALES Y MUNICIPALES" Servel (https://www.servel.cl/resultados-definitivos-elecciones-de-convencionales-constituyent…
ADMINISTRADORA DE SUPERMERCADOS HIPER LIMITADA	LUCY ANA AVILES HERNANDEZ, Walmart's main shareholder family, contributes to Bernardo Fontaine Talavera and Marcela Cubillos (https://www.escuelasol.cl/cl_luzit_herramientas/static/adjuntos/6755/GGEFE_F.pdf and "ELECCIONES DEFINITIVAS CONVENCIONALES CONSTITUYENTES, GOBERNADORES REGIONALES Y MUNICIPALES" Servel (https://www.servel.cl/resultados-definitivos-elecciones-de-convencionales-constituyent…
AGRICOLA ARIZTIA	Ismael Correa, CEO (https://www.ariztia.com/empresas/ , / https://www.conicyt.cl/wp-content/themes/fondef/encuentra_proyectos/INST/2112000.html). Contributes to MIGUEL CARLOS BEJIDE CATRILEO (https://www.escuelasol.cl/cl_luzit_herramientas/static/adjuntos/6755/GGEFE_F.pdf and "ELECCIONES DEFINITIVAS CONVENCIONALES CONSTITUYENTES, GOBERNADORES REGIONALES Y MUNICIPALES" Servel (https://www.servel.c…
AGRICOLA SUPER LIMITADA	Agrosuper subsidiary (https://www.agrosuper.cl/wp-content/uploads/2019/09/EEFF-IFRS-AGROSUPER-06_2019.pdf). MARIA JOSE VIAL CONCHA, director, and FERNANDO BARROS TOCORNAL, director (https://www.cmfchile.cl/institucional/mercados/consulta.php?mercado=V&Estado=VI&entidad=RVEMI / Revisión 31 08 2021 / Revisando Diretorio, Gerentes e inversionistas con más de un 1%). MARIA JOSE VIAL CONCHA: "Bernardo…
AGROINDUSTRIAL EL PAICO S.A.	Ariztía subsidiary (https://www.mercantil.com/empresa/agroindustrial-el-paico-ltda/el-monte/300076287/esp/ https://www.jetro.go.jp/chile/Proyectos/eenergetica/200911_Seminario.html/Presentacion_EE-Ariztia.pdf). Ismael Correa, CEO (https://www.ariztia.com/empresas/ , / https://www.conicyt.cl/wp-content/themes/fondef/encuentra_proyectos/INST/2112000.html). Contributes to MIGUEL CARLOS BEJIDE CATRIL…
AGROSUPER COMERCIALIZADORA DE ALIMENTOS LTDA	MARIA JOSE VIAL CONCHA, director, and FERNANDO BARROS TOCORNAL, director (https://www.cmfchile.cl/institucional/mercados/consulta.php?mercado=V&Estado=VI&entidad=RVEMI / Revisión 31 08 2021 / Revisando Diretorio, Gerentes e inversionistas con más de un 1%). MARIA JOSE VIAL CONCHA: "Bernardo Fontaine Talavera, Candidato Constituyente", among others. FERNANDO BARROS TOCORNAL: "RODRIGO ALEJANDRO ALV…
AGUAS ANDINAS S A	JUAN CUNEO SOLARI, investor (https://www.cmfchile.cl/institucional/mercados/consulta.php?mercado=V&Estado=VI&entidad=RVEMI / Revisión 31 08 2021 / Revisando Diretorio, Gerentes e inversionistas con más de un 1%). "Grupo Solari - Del Rio Este Grupo Familiar, es controlador de Falabella y sus filiales. Aportan lo siguiente PIERO SOLARI DONAGGIO $ 60.566.000, SANDRO SOLARI DONAGGIO $ 58.174.400, CAR…
ANTARFOOD S A	Agrosuper subsidiary (https://www.agrosuper.cl/wp-content/uploads/2019/09/EEFF-IFRS-AGROSUPER-06_2019.pdf). MARIA JOSE VIAL CONCHA, director, and FERNANDO BARROS TOCORNAL, director (https://www.cmfchile.cl/institucional/mercados/consulta.php?mercado=V&Estado=VI&entidad=RVEMI / Revisión 31 08 2021 / Revisando Diretorio, Gerentes e inversionistas con más de un 1%). MARIA JOSE VIAL CONCHA: "Bernardo…
AQUACHILE S A	Agrosuper subsidiary (https://www.agrosuper.cl/wp-content/uploads/2019/09/EEFF-IFRS-AGROSUPER-06_2019.pdf). MARIA JOSE VIAL CONCHA, director, and FERNANDO BARROS TOCORNAL, director (https://www.cmfchile.cl/institucional/mercados/consulta.php?mercado=V&Estado=VI&entidad=RVEMI / Revisión 31 08 2021 / Revisando Diretorio, Gerentes e inversionistas con más de un 1%). MARIA JOSE VIAL CONCHA: "Bernardo…
BLUMAR S.A.	ANDRÉS SANTA CRUZ LÓPEZ, second vice president (https://www.blumar.com/compania). Contributes to ANTONIO WALKER PRIETO, "CONVENCIONAL CONSTITUYENTE" at VAMOS POR CHILE, 574.177 chilean pesos ("ELECCIONES DEFINITIVAS CONVENCIONALES CONSTITUYENTES, GOBERNADORES REGIONALES Y MUNICIPALES" Servel (https://www.servel.cl/resultados-definitivos-elecciones-de-convencionales-constituyentes-gobernadores-reg…
CAMANCHACA CULTIVOS SUR S.A.	RICARDO GARCIA HOLTZ, CEO (https://www.cmfchile.cl/institucional/mercados/consulta.php?mercado=V&Estado=VI&entidad=RVEMI / Revisión 31 08 2021 / Revisando Diretorio, Gerentes e inversionistas con más de un 1%). Contributes to MARCOS ALBERTO EMILFORK KONOW, ELIAS ABRAHAM RAMOS MUÑOZ, RODRIGO ALEJANDRO ALVAREZ ZENTENO, and LUIS ARTURO ZUÑIGA JORY, among others ("ELECCIONES DEFINITIVAS CONVENCIONALE…
CAP	RODOLFO AMERICO KRAUSE LUBASCHER, Ex President, contributes to Alejandro Fernández González (https://www.escuelasol.cl/cl_luzit_herramientas/static/adjuntos/6755/GGEFE_F.pdf and "ELECCIONES DEFINITIVAS CONVENCIONALES CONSTITUYENTES, GOBERNADORES REGIONALES Y MUNICIPALES" Servel (https://www.servel.cl/resultados-definitivos-elecciones-de-convencionales-constituyentes-gobernadores-regionales-alcald…
CARTULINAS CMPC S A	The Matte group owns it. The Matte family contribute as follows JORGE BERNARDO LARRAIN MATTE $59.000.000, HERNAN LARRAIN MATTE $30.000.000, MARIA PATRICIA MATTE LARRAIN $17.000.000, ELIODORO MATTE LARRAIN $16.812.000, MARIA DEL PILAR MATTE CAPDEVILA $12.000.009, BERNARDO MATTE IZQUIERDO $10.000.000, MAGDALENA MATTE LECAROS $4.300.000, MAGDALENA LARRAIN MATTE $4.043.290, MARIA JOSE LARRAIN MATTE $…
CELULOSA ARAUCO Y CONSTITUCION S A	GONZALO ZEGERS RUIZ-TAGLE, Senior Executive VICE PRESIDENT INTERNATIONAL NEW BUSINESSES, CHARLES KIMBER WYLIE Chief Executive Officer CORPORATE MANAGER PEOPLE SUSTAINABILITY (https://www.cmfchile.cl/institucional/mercados/consulta.php?mercado=V&Estado=VI&entidad=RVEMI / Revisión 31 08 2021 / Revisando Diretorio, Gerentes e inversionistas con más de un 1%). CHARLES FRANK KIMBER WYLIE contributes t…
CEMENTO POLPAICO S A	FELIPE SILVA MENDEZ, vice president (https://www.cmfchile.cl/institucional/mercados/consulta.php?mercado=V&Estado=VI&entidad=RVEMI / Revisión 31 08 2021 / Revisando Diretorio, Gerentes e inversionistas con más de un 1%). Contributes to Luis Arturo Zuñiga ("ELECCIONES DEFINITIVAS CONVENCIONALES CONSTITUYENTES, GOBERNADORES REGIONALES Y MUNICIPALES" Servel (https://www.servel.cl/resultados-definiti…
Central Termica Hornitos	Colbun subsidiary (https://www.colbun.cl/centrales/hornitos/). JORGE BERNARDO LARRAIN MATTE, vice president, and RODRIGO JOSÉ DONOSO MUNITA, director (https://www.cmfchile.cl/institucional/mercados/consulta.php?mercado=V&Estado=VI&entidad=RVEMI / Revisión 31 08 2021 / Revisando Diretorio, Gerentes e inversionistas con más de un 1%). RODRIGO JOSE DONOSO MUNITA contributes to Alejandro Fernández Go…
CENTRAL TERMOELECTRICA ANDINA S A	Engie subsidiary (https://engie-energia.cl/wp-content/uploads/2018/06/201604-Reporte-Integrado-EECL.pdf, https://www.engie.cl/wp-content/uploads/2018/06/201004-Memoria-Anual-E-CL-y-Estados-Financieros.pdf). FRANCISCA CASTRO FONES, alternate director, contributes to René Cortázar ("ELECCIONES DEFINITIVAS CONVENCIONALES CONSTITUYENTES, GOBERNADORES REGIONALES Y MUNICIPALES" Servel (https://www.serv…
CERVECERA CCU CHILE LIMITADA	JOSÉ MIGUEL BARROS VAN HOVELL TOT WESTERFLIER, director (https://www.cmfchile.cl/institucional/mercados/consulta.php?mercado=V&Estado=VI&entidad=RVEMI / Revisión 31 08 2021 / Revisando Diretorio, Gerentes e inversionistas con más de un 1%). Contributes to Bernardo Fontaine Talavera, among others (https://www.escuelasol.cl/cl_luzit_herramientas/static/adjuntos/6755/GGEFE_F.pdf and "ELECCIONES DEFI…
CIA PAPELERA DEL PACIFICO S A	Coipsa Holding, Magdalena Matte Lecaros, director (https://cl.linkedin.com/company/compa-ia-papelera-pacifico-s.a https://www.guiachileenergia.cl/energia-pacifico-s-a/ https://www.energiapacifico.cl/ https://www.coipsa.cl/). She contributes to HERNAN LARRAIN MATTE ("ELECCIONES DEFINITIVAS CONVENCIONALES CONSTITUYENTES, GOBERNADORES REGIONALES Y MUNICIPALES" Servel (https://www.servel.cl/resultado…
CIA SIDERURGICA HUACHIPATO S A	Cap Acero subsidiary, Catalina Mertz Kaiser, CEO (https://www.capacero.cl/cap_acero/noticias/cap-acero-informa-nueva-composicion-de-su-directorio/2020-04-22/124404.html http://www.el-directorio.cl/MINERO/MineroFinal/directorio/empresas/CAP%20Aceros.html). Contributes to RAPHAEL BERGOEING VELA ("ELECCIONES DEFINITIVAS CONVENCIONALES CONSTITUYENTES, GOBERNADORES REGIONALES Y MUNICIPALES" Servel (ht…
CMPC CELULOSA S A	The Matte group owns it. The Matte family contribute as follows JORGE BERNARDO LARRAIN MATTE $59.000.000, HERNAN LARRAIN MATTE $30.000.000, MARIA PATRICIA MATTE LARRAIN $17.000.000, ELIODORO MATTE LARRAIN $16.812.000, MARIA DEL PILAR MATTE CAPDEVILA $12.000.009, BERNARDO MATTE IZQUIERDO $10.000.000, MAGDALENA MATTE LECAROS $4.300.000, MAGDALENA LARRAIN MATTE $4.043.290, MARIA JOSE LARRAIN MATTE $…
CMPC TISSUE S A	The Matte group owns it. The Matte family contribute as follows JORGE BERNARDO LARRAIN MATTE $59.000.000, HERNAN LARRAIN MATTE $30.000.000, MARIA PATRICIA MATTE LARRAIN $17.000.000, ELIODORO MATTE LARRAIN $16.812.000, MARIA DEL PILAR MATTE CAPDEVILA $12.000.009, BERNARDO MATTE IZQUIERDO $10.000.000, MAGDALENA MATTE LECAROS $4.300.000, MAGDALENA LARRAIN MATTE $4.043.290, MARIA JOSE LARRAIN MATTE $…
COCA COLA EMBONOR	ANDRÉS VICUÑA GARCIA-HUIDOBRO, president, DIEGO HERNAN VICUÑA GARCIA-HUIDOBRO, director, MANUEL ANTONIO TOCORNAL ASTORECA, director, JOSE TOMAS ERRAZURIZ GREZ, director (https://www.cmfchile.cl/institucional/mercados/consulta.php?mercado=V&Estado=VI&entidad=RVEMI / Revisión 31 08 2021 / Revisando Diretorio, Gerentes e inversionistas con más de un 1%). All contribute to Bernardo Fontaine Talavera …
COLBUN S A	JORGE BERNARDO LARRAIN MATTE, vice president, and RODRIGO JOSÉ DONOSO MUNITA, director (https://www.cmfchile.cl/institucional/mercados/consulta.php?mercado=V&Estado=VI&entidad=RVEMI / Revisión 31 08 2021 / Revisando Diretorio, Gerentes e inversionistas con más de un 1%). RODRIGO JOSE DONOSO MUNITA contributes to Alejandro Fernández González. Jorge Bernardo Larrain Mattecocntribute to several cand…
CORP NACIONAL DEL COBRE DE CHILE	HERNAN DE SOLMINIHAC TAMPIER, director, PEDRO PABLO ERRAZURIZ DOMINGUEZ, director (https://www.cmfchile.cl/institucional/mercados/consulta.php?mercado=V&Estado=VI&entidad=RVEMI / Revisión 31 08 2021 / Revisando Diretorio, Gerentes e inversionistas con más de un 1%). HERNAN EDUARDO DE SOLMINIHAC TAMPIER contributes to Catalina Parot, and PEDRO PABLO ERRAZURIZ DOMINGUEZ contributes to Hernan Larrai…
CORRUPAC S.A.	Coipsa Holding, Magdalena Matte Lecaros, director (https://cl.linkedin.com/company/compa-ia-papelera-pacifico-s.a https://www.guiachileenergia.cl/energia-pacifico-s-a/ https://www.energiapacifico.cl/ https://www.coipsa.cl/). She contributes to HERNAN LARRAIN MATTE ("ELECCIONES DEFINITIVAS CONVENCIONALES CONSTITUYENTES, GOBERNADORES REGIONALES Y MUNICIPALES" Servel (https://www.servel.cl/resultado…
CRISTALERIAS DE CHILE S A	JUAN ANDRÉS OLIVOS BAMBACH, director (https://www.cmfchile.cl/institucional/mercados/consulta.php?mercado=V&Estado=VI&entidad=RVEMI / Revisión 31 08 2021 / Revisando Diretorio, Gerentes e inversionistas con más de un 1%). Contributes to Marcela Cubillos (https://www.escuelasol.cl/cl_luzit_herramientas/static/adjuntos/6755/GGEFE_F.pdf and "ELECCIONES DEFINITIVAS CONVENCIONALES CONSTITUYENTES, GOBE…
EKONO S.A.	LUCY ANA AVILES HERNANDEZ, Walmart's main shareholder family, contributes to Bernardo Fontaine Talavera and Marcela Cubillos (https://www.escuelasol.cl/cl_luzit_herramientas/static/adjuntos/6755/GGEFE_F.pdf and "ELECCIONES DEFINITIVAS CONVENCIONALES CONSTITUYENTES, GOBERNADORES REGIONALES Y MUNICIPALES" Servel (https://www.servel.cl/resultados-definitivos-elecciones-de-convencionales-constituyent…
ELABORADORA DE ALIMENTOS DONIHUE LTDA	Agrosuper subsidiary (https://www.agrosuper.cl/wp-content/uploads/2019/09/EEFF-IFRS-AGROSUPER-06_2019.pdf). MARIA JOSE VIAL CONCHA, director, and FERNANDO BARROS TOCORNAL, director (https://www.cmfchile.cl/institucional/mercados/consulta.php?mercado=V&Estado=VI&entidad=RVEMI / Revisión 31 08 2021 / Revisando Diretorio, Gerentes e inversionistas con más de un 1%). MARIA JOSE VIAL CONCHA contribute…
EMPRESAS CAROZZI S A	Gonzalo Bofill Velarde, investor (https://www.carozzicorp.com/inversionistas/ ). Contributes to JUAN PABLO RODRIGUEZ OYARZUN, CONSTANZA VERONICA HUBE PORTUS, and FRANCISCO ORREGO BAUZA ("CONVENCIONAL CONSTITUYENTE"), a total of 7.000.000 chilean pesos to "Pacto Vamos por Chile" ("ELECCIONES DEFINITIVAS CONVENCIONALES CONSTITUYENTES, GOBERNADORES REGIONALES Y MUNICIPALES" Servel (https://www.serve…
ENERGIA PACIFICO S.A.	Coipsa Holding (https://cl.linkedin.com/company/compa-ia-papelera-pacifico-s.a, https://www.guiachileenergia.cl/energia-pacifico-s-a/, https://www.energiapacifico.cl/, https://www.coipsa.cl/). Magdalena Matte Lecaros, director (https://www.coipsa.cl/). MAGDALENA MATTE LECAROS contributes to HERNAN LARRAIN MATTE, from EVOLUCION POLITICA, 4.300.000 chilean pesos" (https://www.escuelasol.cl/cl_luzit…
EWOS CHILE ALIMENTOS LIMITADA	KARL SAMSING STAMBUK, ex CEO at EWOS contributes to Pauline Kantor ("ELECCIONES DEFINITIVAS CONVENCIONALES CONSTITUYENTES, GOBERNADORES REGIONALES Y MUNICIPALES" Servel (https://www.servel.cl/resultados-definitivos-elecciones-de-convencionales-constituyentes-gobernadores-regionales-alcaldes-y-concejales/)).
EXPORTADORA LOS FIORDOS	Agrosuper subsidiary (https://www.salmonexpert.cl/article/grupo-aquachile-concretar-reestructuracin-para-consolidar-negocio-salmonicultor/ https://cl.linkedin.com/in/ricardo-gomez-83561466 https://www.cmfchile.cl/sitio/aplic/serdoc/ver_sgd.php?s567=8754ae4d6483985b6b666034ad757bddVFdwQmVFOVVRVEJOUkVFeVRrUm5lRTFCUFQwPQ==&secuencia=-1&t=1555502235). MARIA JOSE VIAL CONCHA, director, and FERNANDO BA…
FAENADORA LO MIRANDA LIMITADA	Agrosuper subsidiary (https://www.salmonexpert.cl/article/grupo-aquachile-concretar-reestructuracin-para-consolidar-negocio-salmonicultor/ https://cl.linkedin.com/in/ricardo-gomez-83561466 https://www.cmfchile.cl/sitio/aplic/serdoc/ver_sgd.php?s567=8754ae4d6483985b6b666034ad757bddVFdwQmVFOVVRVEJOUkVFeVRrUm5lRTFCUFQwPQ==&secuencia=-1&t=1555502235). MARIA JOSE VIAL CONCHA, director, and FERNANDO BA…
FAENADORA SAN VICENTE LIMITADA	Agrosuper subsidiary (https://www.salmonexpert.cl/article/grupo-aquachile-concretar-reestructuracin-para-consolidar-negocio-salmonicultor/, https://cl.linkedin.com/in/ricardo-gomez-83561466, https://www.cmfchile.cl/sitio/aplic/serdoc/ver_sgd.php?s567=8754ae4d6483985b6b666034ad757bddVFdwQmVFOVVRVEJOUkVFeVRrUm5lRTFCUFQwPQ==&secuencia=-1&t=1555502235). MARIA JOSE VIAL CONCHA, director, and FERNANDO …
FALABELLA RETAIL S.A.	CARLO SOLARI DONAGGIO, president, JUAN CARLOS CORTES SOLARI, vice president, JOSE LUIS DEL RIO GOUDIE, director, SERGIO CARDONE SOLARI, director, and FELIPE AURELIO DEL RIO GOUDIE, director (https://www.cmfchile.cl/institucional/mercados/consulta.php?mercado=V&Estado=VI&entidad=RVEMI / Revisión 31 08 2021 / Revisando Diretorio, Gerentes e inversionistas con más de un 1%). "Grupo Solari - Del Rio …
GERDAU AZA / ACEROS AZA	José Luis del Rio Goudie, director (https://www.aza.cl/quienes-somos/gobierno-corporativo/). JOSE LUIS DEL RIO GOUDIE contributes 25.120.000 chilean pesos ((https://www.escuelasol.cl/cl_luzit_herramientas/static/adjuntos/6755/GGEFE_F.pdf and "ELECCIONES DEFINITIVAS CONVENCIONALES CONSTITUYENTES, GOBERNADORES REGIONALES Y MUNICIPALES" Servel (https://www.servel.cl/resultados-definitivos-elecciones…
GREENPLAST SA	Wenco subsidiary (https://greenplast.cl/). Anselmo Cyril Palma Pfotzer, director (https://www.cmfchile.cl/sitio/aplic/serdoc/ver_sgd.php?s567=19bdea5f4694936f88f0b563e5a9a356VFdwQmVVMUVSWGhOUkZFMFRYcGplRTFCUFQwPQ==&secuencia=1). Contributes to JUAN CARLOS GAZMURI BARKER, DUILIO RENZO DE LAPEYRA PALMA y XIMENA FRANCISCA AYALA FARIAS, 2.000.000 chilean pesos to Vamos por chile y Chile vamos" ("ELEC…
HIPERMERCADOS TOTTUS SA	CARLO SOLARI DONAGGIO, president, JUAN CARLOS CORTES SOLARI, vice president, JOSE LUIS DEL RIO GOUDIE, director, SERGIO CARDONE SOLARI, director, and FELIPE AURELIO DEL RIO GOUDIE, director (https://www.cmfchile.cl/institucional/mercados/consulta.php?mercado=V&Estado=VI&entidad=RVEMI / Revisión 31 08 2021 / Revisando Diretorio, Gerentes e inversionistas con más de un 1%). "Grupo Solari - Del Rio …
IANSAGRO S A	FELIX JULIO BACIGALUPO VICUNA, ex president, contributes to Marcela Cubillos, and JUAN EDGARDO OBACH GONZALEZ, ex president, contributes to Hernan Larrain Matte (https://www.escuelasol.cl/cl_luzit_herramientas/static/adjuntos/6755/GGEFE_F.pdf and "ELECCIONES DEFINITIVAS CONVENCIONALES CONSTITUYENTES, GOBERNADORES REGIONALES Y MUNICIPALES" Servel (https://www.servel.cl/resultados-definitivos-elecc…
INVERSIONES LAS GARZAS S A	Resiter subsidiary (https://calagro.cl/). ALVARO SALOMON FISCHER ABELIUK (https://www.resiter.com/sobre-resiter/) contributes to Ignacio Briones ("ELECCIONES DEFINITIVAS CONVENCIONALES CONSTITUYENTES, GOBERNADORES REGIONALES Y MUNICIPALES" Servel (https://www.servel.cl/resultados-definitivos-elecciones-de-convencionales-constituyentes-gobernadores-regionales-alcaldes-y-concejales/))).
LOCAL 74 ADMINISTRADORA DE SUPERMERCADOS EXPRESS LIMITADA	LUCY ANA AVILES HERNANDEZ, Walmart's main shareholder family, contributes to Bernardo Fontaine Talavera and Marcela Cubillos (https://www.escuelasol.cl/cl_luzit_herramientas/static/adjuntos/6755/GGEFE_F.pdf and "ELECCIONES DEFINITIVAS CONVENCIONALES CONSTITUYENTES, GOBERNADORES REGIONALES Y MUNICIPALES" Servel (https://www.servel.cl/resultados-definitivos-elecciones-de-convencionales-constituyent…
LUCCHETTI CHILE S.A	Anibal Larrain Cruzat, director (https://www.fundacionlarrainvial.com/). Contributes to BERNARDO FONTAINE TALAVERA ("ELECCIONES DEFINITIVAS CONVENCIONALES CONSTITUYENTES, GOBERNADORES REGIONALES Y MUNICIPALES" Servel (https://www.servel.cl/resultados-definitivos-elecciones-de-convencionales-constituyentes-gobernadores-regionales-alcaldes-y-concejales/).
MOLIBDENOS Y METALES S A	EDUARDO GUILISASTI GANA, president, (https://www.cmfchile.cl/institucional/mercados/consulta.php?mercado=V&Estado=VI&entidad=RVEMI / Revisión 31 08 2021 / Revisando Diretorio, Gerentes e inversionistas con más de un 1%). Details for the contributions of the Guilisasti Family: JOSEFINA GUILISASTI GANA to PEDRO CAYUQUEO MILLAQUEO, RAFAEL GUILISASTI GANA to JUAN LUIS OSSA SANTA CRUZ, RAFAEL GUILISAS…
PAPELERA DIMAR S A	JONATAN FINCES MORAN VERA, CEO, contributes to Hernan Larrain Matte ( (https://www.escuelasol.cl/cl_luzit_herramientas/static/adjuntos/6755/GGEFE_F.pdf and "ELECCIONES DEFINITIVAS CONVENCIONALES CONSTITUYENTES, GOBERNADORES REGIONALES Y MUNICIPALES" Servel (https://www.servel.cl/resultados-definitivos-elecciones-de-convencionales-constituyentes-gobernadores-regionales-alcaldes-y-concejales/).
PAPELES CORDILLERA	The Matte group owns it (http://www.papelescordillera.cl/interior.aspx?cid=42&leng=es). The Matte family contribute as follows JORGE BERNARDO LARRAIN MATTE $59.000.000, HERNAN LARRAIN MATTE $30.000.000, MARIA PATRICIA MATTE LARRAIN $17.000.000, ELIODORO MATTE LARRAIN $16.812.000, MARIA DEL PILAR MATTE CAPDEVILA $12.000.009, BERNARDO MATTE IZQUIERDO $10.000.000, MAGDALENA MATTE LECAROS $4.300.000,…
PISCICULTURA AQUASAN S A	Agrosuper subsidiary (https://www.agrosuper.cl/wp-content/uploads/2021/08/Reporte-Integrado-Matriz-Agrosuper-2020-web.pdf). MARIA JOSE VIAL CONCHA, director, and FERNANDO BARROS TOCORNAL, director (https://www.cmfchile.cl/institucional/mercados/consulta.php?mercado=V&Estado=VI&entidad=RVEMI / Revisión 31 08 2021 / Revisando Diretorio, Gerentes e inversionistas con más de un 1%). MARIA JOSE VIAL C…
PROCESADORA AGUAS CLARAS LIMITADA	Agrosuper subsidiary (https://www.agrosuper.cl/wp-content/uploads/2021/08/Reporte-Integrado-Matriz-Agrosuper-2020-web.pdf). MARIA JOSE VIAL CONCHA, director, and FERNANDO BARROS TOCORNAL, director (https://www.cmfchile.cl/institucional/mercados/consulta.php?mercado=V&Estado=VI&entidad=RVEMI / Revisión 31 08 2021 / Revisando Diretorio, Gerentes e inversionistas con más de un 1%). MARIA JOSE VIAL C…
PROCESADORA DE ALIMENTOS DEL SUR LIMITADA	Agrosuper subsidiary (https://www.agrosuper.cl/wp-content/uploads/2021/08/Reporte-Integrado-Matriz-Agrosuper-2020-web.pdf). MARIA JOSE VIAL CONCHA, director, and FERNANDO BARROS TOCORNAL, director (https://www.cmfchile.cl/institucional/mercados/consulta.php?mercado=V&Estado=VI&entidad=RVEMI / Revisión 31 08 2021 / Revisando Diretorio, Gerentes e inversionistas con más de un 1%). MARIA JOSE VIAL C…
RECUPAC S A	Coipsa Holding, Magdalena Matte Lecaros, director (https://cl.linkedin.com/company/compa-ia-papelera-pacifico-s.a https://www.guiachileenergia.cl/energia-pacifico-s-a/ https://www.energiapacifico.cl/ https://www.coipsa.cl/). She contributes to HERNAN LARRAIN MATTE ("ELECCIONES DEFINITIVAS CONVENCIONALES CONSTITUYENTES, GOBERNADORES REGIONALES Y MUNICIPALES" Servel (https://www.servel.cl/resultado…
RESITER INDUSTRIAL S.A.	ALVARO SALOMON FISCHER ABELIUK (https://www.resiter.com/sobre-resiter/) contributes to Ignacio Briones ("ELECCIONES DEFINITIVAS CONVENCIONALES CONSTITUYENTES, GOBERNADORES REGIONALES Y MUNICIPALES" Servel (https://www.servel.cl/resultados-definitivos-elecciones-de-convencionales-constituyentes-gobernadores-regionales-alcaldes-y-concejales/))).
S Q M SALAR S A	PATRICIO ALEJANDRO DE SOLMINIHAC TAMPIER, Ex CEO contributes to Luis Arturo Zuñiga ((https://www.escuelasol.cl/cl_luzit_herramientas/static/adjuntos/6755/GGEFE_F.pdf and "ELECCIONES DEFINITIVAS CONVENCIONALES CONSTITUYENTES, GOBERNADORES REGIONALES Y MUNICIPALES" Servel (https://www.servel.cl/resultados-definitivos-elecciones-de-convencionales-constituyentes-gobernadores-regionales-alcaldes-y-con…
SOC RECUPERADORA DE PAPEL	The Matte group owns it (https://www.sorepa.cl/sorepa/contenidos.aspx?cat=2). The Matte family contribute as follows JORGE BERNARDO LARRAIN MATTE $59.000.000, HERNAN LARRAIN MATTE $30.000.000, MARIA PATRICIA MATTE LARRAIN $17.000.000, ELIODORO MATTE LARRAIN $16.812.000, MARIA DEL PILAR MATTE CAPDEVILA $12.000.009, BERNARDO MATTE IZQUIERDO $10.000.000, MAGDALENA MATTE LECAROS $4.300.000, MAGDALENA…
SOCOFAR LOGISTICA LIMITADA	ANDRES PATRICIO FUENZALIDA GARRI, CEO, contributes to Luis Arturo Zuñiga ((https://www.escuelasol.cl/cl_luzit_herramientas/static/adjuntos/6755/GGEFE_F.pdf and "ELECCIONES DEFINITIVAS CONVENCIONALES CONSTITUYENTES, GOBERNADORES REGIONALES Y MUNICIPALES" Servel (https://www.servel.cl/resultados-definitivos-elecciones-de-convencionales-constituyentes-gobernadores-regionales-alcaldes-y-concejales/))…
SODIMAC S A	JUAN PABLO DEL RIO GOUDIE, president, JOSE LUIS DEL RIO GOUDIE, director, NICOLAS MAJLUF SAPAG, director, and SANDRO SOLARI DONAGGIO, director (https://www.cmfchile.cl/institucional/mercados/consulta.php?mercado=V&Estado=VI&entidad=RVEMI / Revisión 31 08 2021 / Revisando Diretorio, Gerentes e inversionistas con más de un 1%). "Grupo Solari - Del Rio Este Grupo Familiar, es controlador de Falabell…
SOPRAVAL S A	Agrosuper subsidiary (https://www.agrosuper.cl/wp-content/uploads/2019/09/EEFF-IFRS-AGROSUPER-06_2019.pdf). MARIA JOSE VIAL CONCHA, director, and FERNANDO BARROS TOCORNAL, director (https://www.cmfchile.cl/institucional/mercados/consulta.php?mercado=V&Estado=VI&entidad=RVEMI / Revisión 31 08 2021 / Revisando Diretorio, Gerentes e inversionistas con más de un 1%). MARIA JOSE VIAL CONCHA: "Bernardo…
SOPROLE S.A.	GERARDO VICTORINO VARELA ALFONSO, director (https://www.cmfchile.cl/institucional/mercados/consulta.php?mercado=V&Estado=VI&entidad=RVEMI / Revisión 31 08 2021 / Revisando Diretorio, Gerentes e inversionistas con más de un 1%). Contributes to Luis Arturo Zuñiga ("ELECCIONES DEFINITIVAS CONVENCIONALES CONSTITUYENTES, GOBERNADORES REGIONALES Y MUNICIPALES" Servel (https://www.servel.cl/resultados-d…
TIRSA	Coipsa Holding, Magdalena Matte Lecaros, director (https://cl.linkedin.com/company/compa-ia-papelera-pacifico-s.a https://www.guiachileenergia.cl/energia-pacifico-s-a/ https://www.energiapacifico.cl/ https://www.coipsa.cl/). She contributes to HERNAN LARRAIN MATTE ("ELECCIONES DEFINITIVAS CONVENCIONALES CONSTITUYENTES, GOBERNADORES REGIONALES Y MUNICIPALES" Servel (https://www.servel.cl/resultado…
TRANSPORTES CCU LTDA	JOSÉ MIGUEL BARROS VAN HOVELL TOT WESTERFLIER, director (https://www.cmfchile.cl/institucional/mercados/consulta.php?mercado=V&Estado=VI&entidad=RVEMI / Revisión 31 08 2021 / Revisando Diretorio, Gerentes e inversionistas con más de un 1%). Contributes to Bernardo Fontaine Talavera, among others (https://www.escuelasol.cl/cl_luzit_herramientas/static/adjuntos/6755/GGEFE_F.pdf and "ELECCIONES DEFI…
TRESMONTES S.A	Anibal Larrain Cruzat, director (https://www.fundacionlarrainvial.com/). Contributes to BERNARDO FONTAINE TALAVERA ("ELECCIONES DEFINITIVAS CONVENCIONALES CONSTITUYENTES, GOBERNADORES REGIONALES Y MUNICIPALES" Servel (https://www.servel.cl/resultados-definitivos-elecciones-de-convencionales-constituyentes-gobernadores-regionales-alcaldes-y-concejales/).
VINA CONCHA Y TORO S A	RAFAEL GUILISASTI GANA, vice president (https://www.cmfchile.cl/institucional/mercados/consulta.php?mercado=V&Estado=VI&entidad=RVEMI / Revisión 31 08 2021 / Revisando Diretorio, Gerentes e inversionistas con más de un 1%). Details for the contributions of the Guilisasti Family: JOSEFINA GUILISASTI GANA to PEDRO CAYUQUEO MILLAQUEO, RAFAEL GUILISASTI GANA to JUAN LUIS OSSA SANTA CRUZ, RAFAEL GUILI…
VINA SAN PEDRO TARAPACA S.A.	JOSÉ MIGUEL BARROS VAN HOVELL TOT WESTERFLIER, director (https://www.cmfchile.cl/institucional/mercados/consulta.php?mercado=V&Estado=VI&entidad=RVEMI / Revisión 31 08 2021 / Revisando Diretorio, Gerentes e inversionistas con más de un 1%). Contributes to Bernardo Fontaine Talavera, among others (https://www.escuelasol.cl/cl_luzit_herramientas/static/adjuntos/6755/GGEFE_F.pdf and "ELECCIONES DEFI…
VIÑEDOS EMILIANA S.A	RAFAEL GUILISASTI GANA, president, and JOSEFINA GUILISASTI GANA, director (https://www.cmfchile.cl/institucional/mercados/consulta.php?mercado=V&Estado=VI&entidad=RVEMI / Revisión 31 08 2021 / Revisando Diretorio, Gerentes e inversionistas con más de un 1%). Details for the contributions of the Guilisasti Family: JOSEFINA GUILISASTI GANA to PEDRO CAYUQUEO MILLAQUEO, RAFAEL GUILISASTI GANA to JUAN…
WALMART CHILE ALIMENTOS Y SERVICIOS LIMITADA	LUCY ANA AVILES HERNANDEZ, Walmart's main shareholder family, contributes to Bernardo Fontaine Talavera and Marcela Cubillos (https://www.escuelasol.cl/cl_luzit_herramientas/static/adjuntos/6755/GGEFE_F.pdf and "ELECCIONES DEFINITIVAS CONVENCIONALES CONSTITUYENTES, GOBERNADORES REGIONALES Y MUNICIPALES" Servel (https://www.servel.cl/resultados-definitivos-elecciones-de-convencionales-constituyent…
WALMART CHILE MAYORISTA LIMITADA	LUCY ANA AVILES HERNANDEZ, Walmart's main shareholder family, contributes to Bernardo Fontaine Talavera and Marcela Cubillos (https://www.escuelasol.cl/cl_luzit_herramientas/static/adjuntos/6755/GGEFE_F.pdf and "ELECCIONES DEFINITIVAS CONVENCIONALES CONSTITUYENTES, GOBERNADORES REGIONALES Y MUNICIPALES" Servel (https://www.servel.cl/resultados-definitivos-elecciones-de-convencionales-constituyent…
WATT'S	ANIBAL JOSE LARRAIN CRUZAT, president, PABLO JAVIER ECHEVERRÍA BENÍTEZ, director, PABLO TURNER GONZÁLEZ, director, SANTIAGO LARRAIN CRUZAT, CEO (https://www.cmfchile.cl/institucional/mercados/consulta.php?mercado=V&Estado=VI&entidad=RVEMI / Revisión 31 08 2021 / Revisando Diretorio, Gerentes e inversionistas con más de un 1%). ANIBAL JOSE LARRAIN CRUZAT contributes to Bernardo Fontaine Talavera, …
WENCO S A	Anselmo Cyril Palma Pfotzer, director (https://www.cmfchile.cl/sitio/aplic/serdoc/ver_sgd.php?s567=19bdea5f4694936f88f0b563e5a9a356VFdwQmVVMUVSWGhOUkZFMFRYcGplRTFCUFQwPQ==&secuencia=1). Contributes to JUAN CARLOS GAZMURI BARKER, DUILIO RENZO DE LAPEYRA PALMA y XIMENA FRANCISCA AYALA FARIAS, 2.000.000 chilean pesos to Vamos por chile y Chile vamos" ("ELECCIONES DEFINITIVAS CONVENCIONALES CONSTITUY…
